# Supplementary material for: Identification of commensals and molecular components mediating trypsin degradation in the large intestine
Source: Research Square preprint supplement (doi:10.21203/rs.3.rs-774361/v1), 2022-04-05
Supplement: Supplementary file 3 [file a5b53dba54117399c0007b43.xlsx]

## Sheet: 00502_monomer
Protein Accession	Peptide	Unique	Mass	Length	m/z	z	Area 00502_monomer	Start	End	PTM	AScore	Found By
PROKKA_00502	K.FTDQATLQNM(+15.99)SDNGK.W	Y	1684.74	15	843.376	2	26857000	36	50	Oxidation (M)	M10:Oxidation (M):1000.00	PEAKS DB
PROKKA_00502	K.FTDQATLQNMSDNGK.W	Y	1668.74	15	835.379	2	6768500	36	50			PEAKS DB
P00761|TRYP_PIG	R.LGEHNIDVLEGNEQFINAAK.I	Y	2210.1	20	1106.06	2	42992000	58	77			PEAKS DB
P00761|TRYP_PIG	K.IITHPNFNGNTLDNDIM(+15.99)LIK.L	Y	2298.17	20	767.064	3	1613000	78	97	Oxidation (M)	M17:Oxidation (M):1000.00	PEAKS DB
P00761|TRYP_PIG	K.LSSPATLNSR.V	Y	1044.56	10	523.286	2	0	98	107			PEAKS DB
PROKKA_00502	R.YEGNPAVWTK.T	Y	1163.56	10	582.788	2	10709000	105	114			PEAKS DB
P00761|TRYP_PIG	R.VATVSLPR.S	Y	841.502	8	421.758	2	497670000	108	115			PEAKS DB
PROKKA_00502	K.GQYDETPVLWDM(+15.99)SK.G	Y	1683.74	14	842.881	2	3640500	150	163	Oxidation (M)	M12:Oxidation (M):1000.00	PEAKS DB
PROKKA_00502	K.GQYDETPVLWDMSK.G	Y	1667.75	14	834.883	2	590270	150	163			PEAKS DB
PROKKA_00502	K.GGIITETPNIPVK.D	Y	1337.76	13	669.885	2	41904000	164	176			PEAKS DB
PROKKA_00502	K.GGIITETPNIPVKDM(+15.99)TGLDQHQSR.F	Y	2622.31	24	656.585	4	317860	164	187	Oxidation (M)	M15:Oxidation (M):1000.00	PEAKS DB
PROKKA_00502	K.DM(+15.99)TGLDQHQSR.F	Y	1302.56	11	652.289	2	23908000	177	187	Oxidation (M)	M2:Oxidation (M):1000.00	PEAKS DB
PROKKA_00502	K.DMTGLDQHQSR.F	Y	1286.57	11	644.291	2	6935000	177	187			PEAKS DB
PROKKA_00502	R.FVGISADGR.Y	Y	920.472	9	461.243	2	63329000	188	196			PEAKS DB
PROKKA_00502	K.FIGFDVDENYK.W	Y	1345.62	11	673.817	2	20430000	226	236			PEAKS DB
PROKKA_00502	K.YITGTAYM(+15.99)VK.E	Y	1161.57	10	581.795	2	22980000	258	267	Oxidation (M)	M8:Oxidation (M):1000.00	PEAKS DB
PROKKA_00502	K.YITGTAYMVK.E	Y	1145.58	10	573.797	2	3305500	258	267			PEAKS DB
PROKKA_00502	K.SLSLTFDR.D	Y	937.487	8	469.751	2	16221000	412	419			PEAKS DB
PROKKA_00502	K.VTSSVTFK.R	Y	867.47	8	434.743	2	53869000	440	447			PEAKS DB
PROKKA_00502	K.YTVSVPAGSIVINGDAEK.A	Y	1818.94	18	910.477	2	5762600	471	488			PEAKS DB
PROKKA_00502	K.EINISYTGR.A	Y	1051.53	9	526.773	2	45618000	492	500			PEAKS DB
PROKKA_00502	K.M(+15.99)AVSSLDSK.Q	Y	952.454	9	477.234	2	21294000	560	568	Oxidation (M)	M1:Oxidation (M):1000.00	PEAKS DB
PROKKA_00502	K.MAVSSLDSK.Q	Y	936.459	9	469.237	2	19223000	560	568			PEAKS DB
PROKKA_00502	K.QLGVYPSAGQYLYK.G	Y	1585.81	14	793.915	2	15668000	569	582			PEAKS DB
PROKKA_00502	K.GNEYYVK.I	Y	871.408	7	436.711	2	0	583	589			PEAKS DB
PROKKA_00502	K.AGSVTDVLGSNPNEAINLHYTGNYER.E	Y	2790.32	26	931.115	3	3159500	592	617			PEAKS DB
PROKKA_00502	R.EINYDDVTLFK.D	Y	1355.66	11	678.838	2	20251000	618	628			PEAKS DB
PROKKA_00502	R.WESQSYLK.S	Y	1039.5	8	520.756	2	24070000	710	717			PEAKS DB
PROKKA_00502	K.VIYDEFEKPGEDENK.L	Y	1810.83	15	906.421	2	57808000	751	765			PEAKS DB
PROKKA_00502	K.LAGEWTSHIVK.L	Y	1239.66	11	620.838	2	6640900	766	776			PEAKS DB
PROKKA_00502	K.FLVGLTNETSVVNQK.E	Y	1647.88	15	824.949	2	18449000	812	826			PEAKS DB
PROKKA_00502	K.DANGNAIDEISESGLSLK.N	Y	1831.88	18	916.948	2	15156000	852	869			PEAKS DB
PROKKA_00502	K.YDFAFQK.A	Y	917.428	7	459.722	2	34334000	874	880			PEAKS DB
PROKKA_00502	K.ALPLSVGIANK.F	Y	1081.65	11	541.832	2	38831000	881	891			PEAKS DB
PROKKA_00502	K.TTGYSIK.N	Y	768.402	7	385.208	2	25209000	904	910			PEAKS DB
PROKKA_00502	K.NLAFAPTK.R	Y	860.476	8	431.245	2	41146000	911	918			PEAKS DB
PROKKA_00502	R.QGGATPVPSYPM(+15.99)ASVK.N	Y	1604.79	16	803.401	2	27832000	989	1004	Oxidation (M)	M12:Oxidation (M):1000.00	PEAKS DB
PROKKA_00502	R.QGGATPVPSYPMASVK.N	Y	1588.79	16	795.404	2	2697800	989	1004			PEAKS DB
PROKKA_00502	K.VAADAELNITAK.Y	Y	1214.65	12	608.333	2	7944100	1031	1042			PEAKS DB
PROKKA_00502	R.ADINTDDYNSIEQTK.A	Y	1725.77	15	863.893	2	47453000	1177	1191			PEAKS DB
PROKKA_00502	K.GIVLVEVTTENTR.V	Y	1429.78	13	715.897	2	2946300	1243	1255			PEAKS DB

## Sheet: 00502_oligomer
Protein Accession	Peptide	Unique	Mass	Length	m/z	z	Area 0502_dimer	Start	End	PTM	AScore	Found By
PROKKA_00502	K.FTDQATLQNM(+15.99)SDNGK.W	Y	1684.74	15	843.376	2	3829700	36	50	Oxidation (M)	M10:Oxidation (M):1000.00	PEAKS DB
PROKKA_00502	K.FTDQATLQNMSDNGK.W	Y	1668.74	15	835.379	2	911330	36	50			PEAKS DB
P00761|TRYP_PIG	R.LGEHNIDVLEGNEQFINAAK.I	Y	2210.1	20	1106.06	2	10994000	58	77			PEAKS DB
P00761|TRYP_PIG	K.IITHPNFNGNTLDNDIM(+15.99)LIK.L	Y	2298.17	20	767.064	3	287300	78	97	Oxidation (M)	M17:Oxidation (M):1000.00	PEAKS DB
P00761|TRYP_PIG	K.LSSPATLNSR.V	Y	1044.56	10	523.286	2	87055000	98	107			PEAKS DB
PROKKA_00502	R.YEGNPAVWTK.T	Y	1163.56	10	582.788	2	1748100	105	114			PEAKS DB
P00761|TRYP_PIG	R.VATVSLPR.S	Y	841.502	8	421.758	2	283210000	108	115			PEAKS DB
PROKKA_00502	K.GQYDETPVLWDM(+15.99)SK.G	Y	1683.74	14	842.881	2	422320	150	163	Oxidation (M)	M12:Oxidation (M):1000.00	PEAKS DB
PROKKA_00502	K.GGIITETPNIPVK.D	Y	1337.76	13	669.885	2	4844100	164	176			PEAKS DB
PROKKA_00502	K.DM(+15.99)TGLDQHQSR.F	Y	1302.56	11	652.289	2	5701900	177	187	Oxidation (M)	M2:Oxidation (M):1000.00	PEAKS DB
PROKKA_00502	K.DMTGLDQHQSR.F	Y	1286.57	11	644.291	2	1909000	177	187			PEAKS DB
PROKKA_00502	R.FVGISADGR.Y	Y	920.472	9	461.243	2	12956000	188	196			PEAKS DB
PROKKA_00502	K.FIGFDVDENYK.W	Y	1345.62	11	673.817	2	2071100	226	236			PEAKS DB
PROKKA_00502	K.YITGTAYM(+15.99)VK.E	Y	1161.57	10	581.795	2	3051300	258	267	Oxidation (M)	M8:Oxidation (M):1000.00	PEAKS DB
PROKKA_00502	K.YITGTAYMVK.E	Y	1145.58	10	573.797	2	780330	258	267			PEAKS DB
PROKKA_00502	K.SLSLTFDR.D	Y	937.487	8	469.751	2	2648300	412	419			PEAKS DB
PROKKA_00502	K.VTSSVTFK.R	Y	867.47	8	434.743	2	12382000	440	447			PEAKS DB
PROKKA_00502	K.YTVSVPAGSIVINGDAEK.A	Y	1818.94	18	910.477	2	521390	471	488			PEAKS DB
PROKKA_00502	K.EINISYTGR.A	Y	1051.53	9	526.773	2	8114000	492	500			PEAKS DB
PROKKA_00502	K.M(+15.99)AVSSLDSK.Q	Y	952.454	9	477.234	2	4908200	560	568	Oxidation (M)	M1:Oxidation (M):1000.00	PEAKS DB
PROKKA_00502	K.MAVSSLDSK.Q	Y	936.459	9	469.237	2	4589400	560	568			PEAKS DB
PROKKA_00502	K.QLGVYPSAGQYLYK.G	Y	1585.81	14	793.915	2	1657100	569	582			PEAKS DB
PROKKA_00502	K.GNEYYVK.I	Y	871.408	7	436.711	2	10680000	583	589			PEAKS DB
PROKKA_00502	R.EINYDDVTLFK.D	Y	1355.66	11	678.838	2	2279000	618	628			PEAKS DB
PROKKA_00502	R.WESQSYLK.S	Y	1039.5	8	520.756	2	3827200	710	717			PEAKS DB
PROKKA_00502	K.VIYDEFEKPGEDENK.L	Y	1810.83	15	906.421	2	8108900	751	765			PEAKS DB
PROKKA_00502	K.LAGEWTSHIVK.L	Y	1239.66	11	620.838	2	1456500	766	776			PEAKS DB
PROKKA_00502	K.FLVGLTNETSVVNQK.E	Y	1647.88	15	824.949	2	2521500	812	826			PEAKS DB
PROKKA_00502	K.DANGNAIDEISESGLSLK.N	Y	1831.88	18	916.948	2	1655400	852	869			PEAKS DB
PROKKA_00502	K.YDFAFQK.A	Y	917.428	7	459.722	2	5515600	874	880			PEAKS DB
PROKKA_00502	K.TTGYSIK.N	Y	768.402	7	385.208	2	5893400	904	910			PEAKS DB
PROKKA_00502	K.NLAFAPTK.R	Y	860.476	8	431.245	2	7775500	911	918			PEAKS DB
PROKKA_00502	R.QGGATPVPSYPM(+15.99)ASVK.N	Y	1604.79	16	803.401	2	3812000	989	1004	Oxidation (M)	M12:Oxidation (M):1000.00	PEAKS DB
PROKKA_00502	K.VAADAELNITAK.Y	Y	1214.65	12	608.333	2	1147700	1031	1042			PEAKS DB
PROKKA_00502	R.ADINTDDYNSIEQTK.A	Y	1725.77	15	863.893	2	5885800	1177	1191			PEAKS DB
PROKKA_00502	K.GIVLVEVTTENTR.V	Y	1429.78	13	715.897	2	809490	1243	1255			PEAKS DB

## Sheet: 00502 monomer_hPRSS2
Protein Accession	Peptide	Unique	Mass	Length	m/z	z	Area 00502_monomer-hPRSS2	Start	End	PTM	AScore	Found By
PROKKA_00502	K.FTDQATLQNM(+15.99)SDNGK.W	Y	1684.74	15	843.376	2	33689000	36	50	Oxidation (M)	M10:Oxidation (M):1000.00	PEAKS DB
PROKKA_00502	K.FTDQATLQNMSDNGK.W	Y	1668.74	15	835.379	2	8014200	36	50			PEAKS DB
P00761|TRYP_PIG	R.LGEHNIDVLEGNEQFINAAK.I	Y	2210.1	20	1106.06	2	31523000	58	77			PEAKS DB
P07478|TRY2_HUMAN	R.LGEHNIEVLEGNEQFINAAK.I	Y	2224.11	20	742.38	3	2362300	73	92			PEAKS DB
P00761|TRYP_PIG	K.IITHPNFNGNTLDNDIM(+15.99)LIK.L	Y	2298.17	20	767.064	3	1012800	78	97	Oxidation (M)	M17:Oxidation (M):1000.00	PEAKS DB
P00761|TRYP_PIG	K.LSSPATLNSR.V	Y	1044.56	10	523.286	2	0	98	107			PEAKS DB
P07478|TRY2_HUMAN	R.TLDNDILLIK.L	Y	1156.67	10	579.343	2	14246000	103	112			PEAKS DB
PROKKA_00502	R.YEGNPAVWTK.T	Y	1163.56	10	582.788	2	19814000	105	114			PEAKS DB
P00761|TRYP_PIG	R.VATVSLPR.S	Y	841.502	8	421.758	2	697690000	108	115			PEAKS DB
PROKKA_00502	K.GQYDETPVLWDM(+15.99)SK.G	Y	1683.74	14	842.881	2	6773400	150	163	Oxidation (M)	M12:Oxidation (M):1000.00	PEAKS DB
PROKKA_00502	K.GQYDETPVLWDMSK.G	Y	1667.75	14	834.883	2	1134700	150	163			PEAKS DB
PROKKA_00502	K.GGIITETPNIPVK.D	Y	1337.76	13	669.885	2	57166000	164	176			PEAKS DB
PROKKA_00502	K.DM(+15.99)TGLDQHQSR.F	Y	1302.56	11	652.289	2	46221000	177	187	Oxidation (M)	M2:Oxidation (M):1000.00	PEAKS DB
PROKKA_00502	K.DMTGLDQHQSR.F	Y	1286.57	11	644.291	2	8846300	177	187			PEAKS DB
PROKKA_00502	R.FVGISADGR.Y	Y	920.472	9	461.243	2	80378000	188	196			PEAKS DB
PROKKA_00502	K.FIGFDVDENYK.W	Y	1345.62	11	673.817	2	15026000	226	236			PEAKS DB
P07478|TRY2_HUMAN	K.VYNYVDWIK.D	Y	1198.6	9	600.309	2	2307500	232	240			PEAKS DB
PROKKA_00502	K.YITGTAYM(+15.99)VK.E	Y	1161.57	10	581.795	2	18864000	258	267	Oxidation (M)	M8:Oxidation (M):1000.00	PEAKS DB
PROKKA_00502	K.YITGTAYMVK.E	Y	1145.58	10	573.797	2	1474800	258	267			PEAKS DB
PROKKA_00502	K.SLSLTFDR.D	Y	937.487	8	469.751	2	25415000	412	419			PEAKS DB
PROKKA_00502	K.VTSSVTFK.R	Y	867.47	8	434.743	2	60449000	440	447			PEAKS DB
PROKKA_00502	K.IVDISFR.G	Y	848.476	7	425.245	2	463760	455	461			PEAKS DB
PROKKA_00502	K.YTVSVPAGSIVINGDAEK.A	Y	1818.94	18	910.477	2	2280000	471	488			PEAKS DB
PROKKA_00502	K.EINISYTGR.A	Y	1051.53	9	526.773	2	49059000	492	500			PEAKS DB
PROKKA_00502	R.NNETEPM(+15.99)CELK.M	Y	1322.55	11	662.282	2	236740	549	559	Oxidation (M)	M7:Oxidation (M):1000.00	PEAKS DB
PROKKA_00502	K.M(+15.99)AVSSLDSK.Q	Y	952.454	9	477.234	2	36722000	560	568	Oxidation (M)	M1:Oxidation (M):1000.00	PEAKS DB
PROKKA_00502	K.MAVSSLDSK.Q	Y	936.459	9	469.237	2	20921000	560	568			PEAKS DB
PROKKA_00502	K.QLGVYPSAGQYLYK.G	Y	1585.81	14	793.915	2	14835000	569	582			PEAKS DB
PROKKA_00502	K.GNEYYVK.I	Y	871.408	7	436.711	2	0	583	589			PEAKS DB
PROKKA_00502	K.AGSVTDVLGSNPNEAINLHYTGNYER.E	Y	2790.32	26	931.115	3	942450	592	617			PEAKS DB
PROKKA_00502	R.EINYDDVTLFK.D	Y	1355.66	11	678.838	2	19518000	618	628			PEAKS DB
PROKKA_00502	R.WESQSYLK.S	Y	1039.5	8	520.756	2	30973000	710	717			PEAKS DB
PROKKA_00502	K.VIYDEFEKPGEDENK.L	Y	1810.83	15	906.421	2	61195000	751	765			PEAKS DB
PROKKA_00502	K.LAGEWTSHIVK.L	Y	1239.66	11	620.838	2	9608700	766	776			PEAKS DB
PROKKA_00502	K.FLVGLTNETSVVNQK.E	Y	1647.88	15	824.949	2	9847900	812	826			PEAKS DB
PROKKA_00502	K.DANGNAIDEISESGLSLK.N	Y	1831.88	18	916.948	2	12300000	852	869			PEAKS DB
PROKKA_00502	K.YDFAFQK.A	Y	917.428	7	459.722	2	36666000	874	880			PEAKS DB
PROKKA_00502	K.TTGYSIK.N	Y	768.402	7	385.208	2	23932000	904	910			PEAKS DB
PROKKA_00502	K.NLAFAPTK.R	Y	860.476	8	431.245	2	47483000	911	918			PEAKS DB
PROKKA_00502	R.QGGATPVPSYPM(+15.99)ASVK.N	Y	1604.79	16	803.401	2	36338000	989	1004	Oxidation (M)	M12:Oxidation (M):1000.00	PEAKS DB
PROKKA_00502	R.QGGATPVPSYPMASVK.N	Y	1588.79	16	795.404	2	2825500	989	1004			PEAKS DB
PROKKA_00502	K.VAADAELNITAK.Y	Y	1214.65	12	608.333	2	4126400	1031	1042			PEAKS DB
PROKKA_00502	R.ADINTDDYNSIEQTK.A	Y	1725.77	15	863.893	2	57084000	1177	1191			PEAKS DB
PROKKA_00502	K.GIVLVEVTTENTR.V	Y	1429.78	13	715.897	2	1503100	1243	1255			PEAKS DB

## Sheet: 00502 oligomer_hPRSS2
Protein Accession	Peptide	Unique	Mass	Length	m/z	z	Area 00502_dimer-hPRSS2	Start	End	PTM	AScore	Found By
P00761|TRYP_PIG	R.LGEHNIDVLEGNEQFINAAK.I	Y	2210.1	20	1106.06	2	109600000	58	77			PEAKS DB
P00761|TRYP_PIG	K.IITHPNFNGNTLDNDIM(+15.99)LIK.L	Y	2298.17	20	767.064	3	11314000	78	97	Oxidation (M)	M17:Oxidation (M):1000.00	PEAKS DB
P00761|TRYP_PIG	K.LSSPATLNSR.V	Y	1044.56	10	523.286	2	0	98	107			PEAKS DB
P00761|TRYP_PIG	R.VATVSLPR.S	Y	841.502	8	421.758	2	666550000	108	115			PEAKS DB
P07478|TRY2_HUMAN	R.LGEHNIEVLEGNEQFINAAK.I	Y	2224.11	20	742.38	3	1902700	73	92			PEAKS DB
P07478|TRY2_HUMAN	R.TLDNDILLIK.L	Y	1156.67	10	579.343	2	3315900	103	112			PEAKS DB
P07478|TRY2_HUMAN	K.VYNYVDWIK.D	Y	1198.6	9	600.309	2	444680	232	240			PEAKS DB
PROKKA_00502	K.FTDQATLQNM(+15.99)SDNGK.W	Y	1684.74	15	843.376	2	9933500	36	50	Oxidation (M)	M10:Oxidation (M):1000.00	PEAKS DB
PROKKA_00502	K.FTDQATLQNMSDNGK.W	Y	1668.74	15	835.379	2	1005800	36	50			PEAKS DB
PROKKA_00502	R.YEGNPAVWTK.T	Y	1163.56	10	582.788	2	3017200	105	114			PEAKS DB
PROKKA_00502	K.GQYDETPVLWDM(+15.99)SK.G	Y	1683.74	14	842.881	2	1643800	150	163	Oxidation (M)	M12:Oxidation (M):1000.00	PEAKS DB
PROKKA_00502	K.GGIITETPNIPVK.D	Y	1337.76	13	669.885	2	15291000	164	176			PEAKS DB
PROKKA_00502	K.DM(+15.99)TGLDQHQSR.F	Y	1302.56	11	652.289	2	14703000	177	187	Oxidation (M)	M2:Oxidation (M):1000.00	PEAKS DB
PROKKA_00502	K.DMTGLDQHQSR.F	Y	1286.57	11	644.291	2	921840	177	187			PEAKS DB
PROKKA_00502	R.FVGISADGR.Y	Y	920.472	9	461.243	2	20990000	188	196			PEAKS DB
PROKKA_00502	K.FIGFDVDENYK.W	Y	1345.62	11	673.817	2	7553200	226	236			PEAKS DB
PROKKA_00502	K.WTPLAQNLAFIDDAR.I	Y	1729.88	15	865.948	2	221420	237	251			PEAKS DB
PROKKA_00502	K.YITGTAYM(+15.99)VK.E	Y	1161.57	10	581.795	2	7100600	258	267	Oxidation (M)	M8:Oxidation (M):1000.00	PEAKS DB
PROKKA_00502	K.YITGTAYMVK.E	Y	1145.58	10	573.797	2	278180	258	267			PEAKS DB
PROKKA_00502	K.SLSLTFDR.D	Y	937.487	8	469.751	2	8767000	412	419			PEAKS DB
PROKKA_00502	K.VTSSVTFK.R	Y	867.47	8	434.743	2	17378000	440	447			PEAKS DB
PROKKA_00502	K.YTVSVPAGSIVINGDAEK.A	Y	1818.94	18	910.477	2	2034000	471	488			PEAKS DB
PROKKA_00502	K.EINISYTGR.A	Y	1051.53	9	526.773	2	14044000	492	500			PEAKS DB
PROKKA_00502	K.M(+15.99)AVSSLDSK.Q	Y	952.454	9	477.234	2	10096000	560	568	Oxidation (M)	M1:Oxidation (M):1000.00	PEAKS DB
PROKKA_00502	K.MAVSSLDSK.Q	Y	936.459	9	469.237	2	3043300	560	568			PEAKS DB
PROKKA_00502	K.QLGVYPSAGQYLYK.G	Y	1585.81	14	793.915	2	6405200	569	582			PEAKS DB
PROKKA_00502	K.GNEYYVK.I	Y	871.408	7	436.711	2	11989000	583	589			PEAKS DB
PROKKA_00502	K.AGSVTDVLGSNPNEAINLHYTGNYER.E	Y	2790.32	26	931.115	3	3390100	592	617			PEAKS DB
PROKKA_00502	R.EINYDDVTLFK.D	Y	1355.66	11	678.838	2	8682700	618	628			PEAKS DB
PROKKA_00502	K.DDFNNGLGQFLFYEGDK.R	Y	1977.87	17	989.946	2	210030	629	645			PEAKS DB
PROKKA_00502	R.WESQSYLK.S	Y	1039.5	8	520.756	2	6087500	710	717			PEAKS DB
PROKKA_00502	K.VIYDEFEKPGEDENK.L	Y	1810.83	15	906.421	2	18766000	751	765			PEAKS DB
PROKKA_00502	K.LAGEWTSHIVK.L	Y	1239.66	11	620.838	2	2172300	766	776			PEAKS DB
PROKKA_00502	K.FLVGLTNETSVVNQK.E	Y	1647.88	15	824.949	2	7823400	812	826			PEAKS DB
PROKKA_00502	K.DANGNAIDEISESGLSLK.N	Y	1831.88	18	916.948	2	7765800	852	869			PEAKS DB
PROKKA_00502	K.YDFAFQK.A	Y	917.428	7	459.722	2	10830000	874	880			PEAKS DB
PROKKA_00502	K.TTGYSIK.N	Y	768.402	7	385.208	2	6487800	904	910			PEAKS DB
PROKKA_00502	K.NLAFAPTK.R	Y	860.476	8	431.245	2	13490000	911	918			PEAKS DB
PROKKA_00502	R.QGGATPVPSYPM(+15.99)ASVK.N	Y	1604.79	16	803.401	2	11006000	989	1004	Oxidation (M)	M12:Oxidation (M):1000.00	PEAKS DB
PROKKA_00502	R.QGGATPVPSYPMASVK.N	Y	1588.79	16	795.404	2	382150	989	1004			PEAKS DB
PROKKA_00502	K.VAADAELNITAK.Y	Y	1214.65	12	608.333	2	2161300	1031	1042			PEAKS DB
PROKKA_00502	R.ADINTDDYNSIEQTK.A	Y	1725.77	15	863.893	2	14781000	1177	1191			PEAKS DB
PROKKA_00502	K.GIVLVEVTTENTR.V	Y	1429.78	13	715.897	2	1326100	1243	1255			PEAKS DB
