# Supplementary material for: Identification of commensals and molecular components mediating trypsin degradation in the large intestine
Source: Research Square preprint supplement (doi:10.21203/rs.3.rs-774361/v1), 2022-04-05
Supplement: Supplementary file 5 [file b0409b224009f5543cb99e1a.xlsx]

## Sheet: All proteins detected
Supplementary Table 1 - Host-derived proteins detected in the caecal contents from GF and SPF mice (713 proteins)
No	Uniprot ID	Protein name	Gene name	No. of amino acids	SPF1 area	SPF2 area	SPF3 area	GF1 area	GF2 area	GF3 area	SPF_Average	GF_Average	SPF/GF	P-value SPFvsGF
1	E9Q9C6	Protein Fcgbp	Fcgbp	2583	1.9734e+07	1.83067e+07	2.25717e+07	6.44547e+07	5.60312e+07	5.67225e+07	2.02041e+07	5.90695e+07	0.34204	0.00130761
2	B5THE2	Maltase-glucoamylase	Mgam	1827	2.34991e+06	3.20824e+06	4.22273e+06	1.39659e+07	1.28592e+07	1.3543e+07	3.26029e+06	1.3456e+07	0.242293	0.00031611
3	F8VQM5	Platelet-derived growth factor subunit B	Sis	1818	9.07124e+06	1.1633e+07	1.45705e+07	6.80901e+06	6.05143e+06	6.62547e+06	1.17582e+07	6.4953e+06	1.81027	0.0774407
4	E9QPG8	Deleted in malignant brain tumors 1 protein	Dmbt1	1946	3.03682e+06	2.028e+06	2.50268e+06	6.48811e+07	5.90645e+07	6.61059e+07	2.5225e+06	6.33505e+07	0.0398182	0.00106964
5	P97449	Aminopeptidase N	Anpep	966	2.01447e+07	1.64532e+07	2.21163e+07	4.86178e+06	7.05641e+06	6.11418e+06	1.95714e+07	6.01079e+06	3.25604	0.00781818
6	Q792Y6	Anionic trypsin-2	Prss2	246	3.30516e+06	2.87752e+06	3.1499e+06	4.0869e+07	3.19578e+07	3.48337e+07	3.11086e+06	3.58868e+07	0.0866852	0.00626369
7	Q9CQ52	Chymotrypsin-like elastase family member 3B	Cela3b	269	2.0028e+07	1.31409e+07	1.39288e+07	1.15652e+08	1.29021e+08	1.12997e+08	1.56992e+07	1.19223e+08	0.131679	0.000532869
8	Q9R100	Cadherin-17	Cdh17	827	1.11484e+07	1.1852e+07	1.43544e+07	1.71215e+06	1.37675e+06	1.20802e+06	1.24516e+07	1.43231e+06	8.6934	0.00669388
9	Q80Z19	Mucin-2 (Fragments)	Muc2	2680	8.97557e+06	7.23096e+06	7.92253e+06	4.20562e+06	4.62215e+06	4.91831e+06	8.04302e+06	4.58202e+06	1.75534	0.0115297
10	Q7M758	N-acetylated-alpha-linked acidic dipeptidase-like protein	Naaladl1	745	3.77009e+06	3.60393e+06	5.63791e+06	1.64846e+07	1.67044e+07	1.80207e+07	4.33731e+06	1.70699e+07	0.254091	0.000166661
11	Q91XA9	Acidic mammalian chitinase	Chia	473	3.07306e+06	2.49062e+06	3.68528e+06	3.20249e+07	2.11568e+07	2.28983e+07	3.08298e+06	2.536e+07	0.121569	0.0212046
12	F8VPQ6	Alkaline phosphatase	Alpi	554	672888	1.04759e+06	1.28714e+06	6.47954e+06	5.95464e+06	6.98968e+06	1.00254e+06	6.47462e+06	0.154842	0.000342321
13	P09470	Angiotensin-converting enzyme	Ace	1312	480878	684414	797947	6.86604e+06	6.71404e+06	7.01625e+06	654413	6.86544e+06	0.0953198	1.10211e-06
14	Q6P8U6	Pancreatic triacylglycerol lipase	Pnlip	465	3.16305e+07	1.63466e+07	1.67041e+07	829576	857007	1.28891e+06	2.15604e+07	991832	21.7379	0.0549282
15	A0A0R4J0I1	MCG1051009	Serpina3k	418	1.2055e+07	1.00616e+07	1.10379e+07	5.92993e+06	6.45087e+06	6.86739e+06	1.10515e+07	6.41606e+06	1.72248	0.00635594
16	Q52JJ6	Aminopeptidase A	Enpep	945	6.23441e+06	5.61356e+06	8.11434e+06	8.17889e+06	8.47622e+06	8.29954e+06	6.6541e+06	8.31822e+06	0.799943	0.155641
17	G3X8Z1	Calcium-activated chloride channel regulator 4A	Clca4a	925	898828	988117	1.21739e+06	1.38863e+06	1.55521e+06	1.75711e+06	1.03478e+06	1.56699e+06	0.660361	0.0207681
18	E9Q7P9	Cadherin-related family member 2	Cdhr2	1308	7.32965e+06	7.5835e+06	9.81268e+06	2.19648e+06	2.60943e+06	2.47932e+06	8.24194e+06	2.42841e+06	3.39397	0.0161186
19	F8VPT3	Protein Lct	Lct	1931	1.46326e+06	1.92e+06	2.11612e+06	1.42972e+06	1.38189e+06	1.4431e+06	1.83313e+06	1.41824e+06	1.29254	0.163957
20	Q61847	Meprin A subunit beta	Mep1b	704	7.32282e+06	7.58912e+06	9.26035e+06	8.54395e+06	9.35638e+06	9.83065e+06	8.05743e+06	9.24366e+06	0.871671	0.185599
21	B9EHG7	N-acylsphingosine amidohydrolase 2	Asah2	756	2.04135e+06	2.5572e+06	3.82742e+06	3.45105e+06	3.12139e+06	3.06994e+06	2.80866e+06	3.21413e+06	0.873848	0.527461
22	B2RU69	CUB and zona pellucida-like domain-containing protein 1	Cuzd1	607	5.95835e+06	5.00573e+06	6.49317e+06	8.84319e+06	9.30159e+06	9.49416e+06	5.81908e+06	9.21298e+06	0.631618	0.0074522
23	Q6DYE8	Ectonucleotide pyrophosphatase/phosphodiesterase family member 3	Enpp3	874	2.08906e+06	2.50207e+06	3.0909e+06	1.72024e+06	1.41551e+06	1.92613e+06	2.56068e+06	1.6873e+06	1.51762	0.0759574
24	Q8R0I0	Angiotensin-converting enzyme 2	Ace2	805	444975	538204	584179	2.82289e+06	2.58386e+06	2.99245e+06	522453	2.79973e+06	0.186608	0.00108067
25	Q00896	Alpha-1-antitrypsin 1-3	Serpina1c	412	475042	393605	485348	561397	534332	609857	451332	568529	0.793859	0.0358033
26	P00688	Pancreatic alpha-amylase	Amy2	508	7.01646e+06	2.44072e+06	845100	2.77217e+06	1.7577e+06	7.17265e+06	3.43409e+06	3.90084e+06	0.880347	0.860336
27	P18761	Carbonic anhydrase 6	Ca6	317	1.33834e+07	1.17727e+07	1.34209e+07	1.46429e+07	1.47123e+07	1.40782e+07	1.2859e+07	1.44778e+07	0.888187	0.0825085
28	Q91VB8	Alpha globin 1	Hba-a1	142	1.53619e+07	3.09764e+07	8.75668e+06	461747	1.12915e+06	604934	1.8365e+07	731944	25.0907	0.115686
29	Q7TPZ8	Carboxypeptidase A1	Cpa1	419	4.4754e+07	2.4104e+07	2.34979e+07	2.27234e+06	1.18413e+06	2.35297e+06	3.07853e+07	1.93648e+06	15.8976	0.0535594
30	A0A075B6A3	Protein Igha (Fragment)	Igha	344	1.31149e+07	1.62285e+07	1.60349e+07	7.64157e+06	1.06873e+07	7.40206e+06	1.51261e+07	8.57696e+06	1.76357	0.011009
31	Q546G4	Albumin 1	Alb	608	7.74785e+06	1.95784e+07	1.65871e+07	826290	2.55172e+06	316236	1.46378e+07	1.23142e+06	11.887	0.0589185
32	P28843	Dipeptidyl peptidase 4	Dpp4	760	3.16105e+06	3.17686e+06	3.72264e+06	1.55566e+06	1.68126e+06	1.85343e+06	3.35352e+06	1.69678e+06	1.97639	0.00477948
33	F8VQM0	Alkaline phosphatase	Akp3	559	882510	1.00967e+06	918143	6.92535e+06	6.7995e+06	7.38098e+06	936774	7.03528e+06	0.133154	0.000520457
34	Q61391	Neprilysin	Mme	750	1.56496e+06	1.80141e+06	2.27927e+06	1.54891e+06	1.49165e+06	1.60419e+06	1.88188e+06	1.54825e+06	1.21549	0.251563
35	A0A0J9YVE6	Protein Mgam	Mgam	1200	1.00639e+06	1.71047e+06	2.72302e+06	1.67293e+07	1.55202e+07	1.60791e+07	1.81329e+06	1.61095e+07	0.11256	4.68302e-05
36	F8WIV2	Serpin B6	Serpinb6a	399	6.71641e+06	8.67359e+06	1.11147e+07	3.43825e+06	3.83476e+06	4.24537e+06	8.8349e+06	3.83946e+06	2.30108	0.0549167
37	A2RS23	Peptidase D	Pepd	493	849811	1.98995e+06	1.47416e+06	1.26937e+06	1.2866e+06	1.41326e+06	1.43797e+06	1.32308e+06	1.08684	0.761731
38	Q9D7Z6	Calcium-activated chloride channel regulator 1	Clca1	913	714193	574837	762563	1.08597e+06	1.43856e+06	1.29569e+06	683865	1.27341e+06	0.537035	0.0137867
39	E9Q5Z6	Protein Adh6a	Adh6a	375	1.69489e+06	2.48136e+06	2.6342e+06	3.40476e+06	2.52117e+06	3.91394e+06	2.27015e+06	3.27996e+06	0.692129	0.120984
40	Q3TTY0	Phospholipase B1, membrane-associated	Plb1	1478	1.43886e+06	1.65446e+06	1.93405e+06	1.52826e+06	1.37447e+06	1.59317e+06	1.67579e+06	1.49863e+06	1.11821	0.347744
41	Q4KL81	Actin, cytoplasmic 2	Actg1	375	2.88912e+06	3.53304e+06	4.81197e+06	160167	158706	138776	3.74471e+06	152550	24.5475	0.0238497
42	Q8C6C9	Protein LEG1 homolog	Leg1	337	3.19568e+07	2.55222e+07	2.87255e+07	3.18914e+06	2.26896e+06	3.17709e+06	2.87348e+07	2.8784e+06	9.98292	0.00425927
43	P13634	Carbonic anhydrase 1	Ca1	261	5.74746e+06	1.54161e+07	1.30826e+07	5.63225e+06	1.06148e+07	5.07719e+06	1.14154e+07	7.10807e+06	1.60598	0.287906
44	A0A0B6VSQ6	Kallikrein 1	Klk1	261	1.39288e+07	9.18001e+06	1.31884e+07	2.00738e+07	1.98444e+07	2.15578e+07	1.20991e+07	2.0492e+07	0.590429	0.0196642
45	A0A0R4J043	Metalloendopeptidase	Mep1a	760	1.29557e+06	1.43805e+06	1.65157e+06	1.94335e+06	2.20686e+06	2.1312e+06	1.46173e+06	2.0938e+06	0.698123	0.00981531
46	A8DUK4	Beta-globin	Hbbt1	147	2.77691e+07	6.17777e+07	1.32754e+07	900937	1.92067e+06	1.14019e+06	3.42741e+07	1.3206e+06	25.9534	0.148847
47	Q62468	Villin-1	Vil1	827	2.14581e+06	2.17606e+06	3.1276e+06	269809	207102	225820	2.48316e+06	234244	10.6007	0.0196488
48	P17563	Selenium-binding protein 1	Selenbp1	472	981898	1.36158e+06	1.37551e+06	1.15485e+06	1.10314e+06	997964	1.23966e+06	1.08532e+06	1.14221	0.356089
49	Q9JLB4	Cubilin	Cubn	3623	574166	627501	781656	1.05571e+06	1.06607e+06	1.07563e+06	661108	1.0658e+06	0.620291	0.0220518
50	Q3TVK3	Aspartyl aminopeptidase	Dnpep	475	1.12779e+06	1.16783e+06	1.087e+06	1.57081e+06	1.66957e+06	1.88153e+06	1.12754e+06	1.7073e+06	0.66042	0.0189508
51	P97429	Annexin A4	Anxa4	319	1.32366e+06	1.50572e+06	1.77083e+06	2.20569e+06	1.82387e+06	2.00976e+06	1.5334e+06	2.01311e+06	0.761709	0.0494488
52	O70570	Polymeric immunoglobulin receptor	Pigr	771	4.80071e+06	6.02018e+06	6.3537e+06	3.39316e+06	4.17116e+06	3.14966e+06	5.72486e+06	3.57133e+06	1.60301	0.0246943
53	A0A0R4J0B9	Glycoprotein 2 (Zymogen granule membrane), isoform CRA_b	Gp2	534	6.40588e+06	4.74553e+06	6.06121e+06	8.79924e+06	1.06766e+07	9.6836e+06	5.73754e+06	9.71983e+06	0.590292	0.00588744
54	A0PJK7	Cadherin-related family member 5	Cdhr5	831	4.22232e+06	3.87438e+06	4.5804e+06	2.57237e+06	2.78305e+06	2.79096e+06	4.2257e+06	2.71546e+06	1.55616	0.0107834
55	B2RS76	Carboxypeptidase B1 (Tissue)	Cpb1	415	9.7749e+06	4.84237e+06	4.19555e+06	3.16902e+06	2.44409e+06	4.88637e+06	6.27094e+06	3.49983e+06	1.79179	0.252812
56	B1AVD1	Protein Xpnpep2	Xpnpep2	674	795830	1.07278e+06	1.41816e+06	998367	1.17294e+06	1.18447e+06	1.09559e+06	1.11859e+06	0.979437	0.912807
57	G3X9V8	MCG129038	Serpinb3a	387	635048	470054	605611	1.79293e+06	1.92478e+06	2.29669e+06	570237	2.0048e+06	0.284436	0.00616928
58	P21447	Multidrug resistance protein 1A	Abcb1a	1276	818198	1.01725e+06	1.38333e+06	222059	219046	158168	1.07292e+06	199758	5.37113	0.0323863
59	A0A0R4IZW5	Cadherin 1, isoform CRA_b	Cdh1	884	2.25935e+06	2.18355e+06	2.36631e+06	997965	845269	965901	2.26974e+06	936378	2.42395	5.22068e-05
60	Q91WG0	Acylcarnitine hydrolase	Ces2c	561	1.05314e+06	1.32752e+06	975305	589814	348972	751750	1.11866e+06	563512	1.98515	0.0251445
61	P31428	Dipeptidase 1	Dpep1	410	1.86704e+06	2.30287e+06	2.88587e+06	3.05888e+06	2.94559e+06	3.31848e+06	2.35193e+06	3.10765e+06	0.756818	0.111249
62	Q9D816	Cytochrome P450 2C55	Cyp2c55	490	1.50849e+06	2.12102e+06	3.01612e+06	11987.7	25888.2	31847.7	2.21521e+06	23241.2	95.3139	0.0376249
63	Q07797	Galectin-3-binding protein	Lgals3bp	577	1.27694e+06	1.02638e+06	1.20827e+06	481572	439081	483387	1.17053e+06	468013	2.50106	0.00913143
64	Q921I1	Serotransferrin	Tf	697	867902	1.49646e+06	1.34654e+06	51396.2	122350	27364.5	1.23697e+06	67037	18.452	0.0231846
65	Q9CR35	Chymotrypsinogen B	Ctrb1	263	1.56941e+07	1.04209e+07	3.46818e+06	752780	682405	785282	9.86108e+06	740156	13.323	0.123384
66	Q9CPY7	Cytosol aminopeptidase	Lap3	519	250779	495076	545204	273323	336494	293287	430353	301035	1.42958	0.289278
67	P11679	Keratin, type II cytoskeletal 8	Krt8	490	1.12819e+06	1.58051e+06	2.11631e+06	302407	480466	264879	1.60834e+06	349251	4.60511	0.0416974
68	Q9D154	Leukocyte elastase inhibitor A	Serpinb1a	379	1.06009e+06	1.27843e+06	1.61632e+06	37571.3	45848	24839.5	1.31828e+06	36086.2	36.5313	0.0154482
69	Q3V1S6	Mucin 13, epithelial transmembrane, isoform CRA_a	Muc13	573	3.26308e+06	2.9974e+06	3.84157e+06	2.7245e+06	3.20351e+06	3.05028e+06	3.36735e+06	2.99276e+06	1.12516	0.277862
70	Q61838	Pregnancy zone protein	Pzp	1495	286574	311540	266116	72581.1	50209.4	67750.7	288077	63513.7	4.53566	0.000620753
71	Q8K0C5	Zymogen granule membrane protein 16	Zg16	167	9.97249e+06	1.06875e+07	1.77072e+07	5.82485e+06	4.523e+06	4.68234e+06	1.2789e+07	5.01006e+06	2.55267	0.0838229
72	Z4YJC9	NPC1-like 1	Npc1l1	1333	445393	472378	669193	402667	407047	380634	528988	396782	1.33319	0.200344
73	P56480	ATP synthase subunit beta, mitochondrial	Atp5b	529	1.26106e+06	1.81104e+06	2.30399e+06	86626.6	102849	137721	1.79203e+06	109065	16.4308	0.0303053
74	A0A0A0MQF6	Glyceraldehyde-3-phosphate dehydrogenase	Gapdh	359	606788	846709	655044	398514	271428	135013	702847	268318	2.61945	0.0147282
75	Q9D1A2	Cytosolic non-specific dipeptidase	Cndp2	475	2.30302e+06	2.87393e+06	3.27486e+06	41299.1	54714.4	30319	2.81727e+06	42110.8	66.9013	0.0101309
76	O88329	Unconventional myosin-Ia	Myo1a	1043	246328	237465	298514	170633	135029	135328	260769	146996	1.77398	0.0113165
77	Q64133	Amine oxidase [flavin-containing] A	Maoa	526	2.14441e+06	2.85371e+06	3.96874e+06	110031	166016	181817	2.98895e+06	152621	19.5841	0.0331162
78	Q4FK28	Ada protein	Ada	352	1.68611e+06	2.11338e+06	2.0289e+06	1.27973e+06	987903	1.65273e+06	1.94279e+06	1.30679e+06	1.48669	0.0600249
79	Q3UW98	Chloride channel calcium activated 7	Clca4b	925	1.27595e+06	1.02924e+06	1.21351e+06	1.01703e+06	1.14324e+06	1.19419e+06	1.1729e+06	1.11815e+06	1.04896	0.582608
80	Q9QUK9	MCG15083	Try5	246	2.49632e+06	1.41577e+06	1.07088e+06	1.65201e+06	1.44599e+06	2.44422e+06	1.66099e+06	1.8474e+06	0.899094	0.742902
81	P24549	Retinal dehydrogenase 1	Aldh1a1	501	788343	1.00915e+06	1.15582e+06	110775	119401	115325	984438	115167	8.54792	0.0147222
82	Q8VDN2	Sodium/potassium-transporting ATPase subunit alpha-1	Atp1a1	1023	710872	1.10836e+06	1.66063e+06	98209.1	96387.3	93113.7	1.15996e+06	95903.4	12.0951	0.0609196
83	Q3UL35	Galectin	Lgals4	326	1.42967e+06	1.70346e+06	2.23992e+06	769789	950119	613677	1.79101e+06	777862	2.30249	0.0364053
84	P28665	Murinoglobulin-1	Mug1	1476	816898	761454	797999	220707	278266	298912	792117	265962	2.97831	0.000113934
85	Q91X79	Chymotrypsin-like elastase family member 1	Cela1	266	2.67773e+06	1.10348e+06	323335	54385.6	97727.1	145623	1.36818e+06	99245.3	13.7859	0.208169
86	Q91WV7	Neutral and basic amino acid transport protein rBAT	Slc3a1	685	1.24755e+06	1.24084e+06	1.64727e+06	833560	896041	864740	1.37855e+06	864781	1.59411	0.0596974
87	Q91WL0	Epidermal growth factor receptor kinase substrate 8-like protein 3	Eps8l3	600	318185	286305	314907	332825	317664	284422	306466	311637	0.983406	0.784037
88	Q9JIP7	Solute carrier family 15 member 1	Slc15a1	709	472688	503095	745540	277869	353366	307210	573774	312815	1.83423	0.086152
89	B1AQ78	Keratin 19	Krt19	403	447881	512318	769546	122451	218194	121835	576582	154160	3.74015	0.0394171
90	P31809	Carcinoembryonic antigen-related cell adhesion molecule 1	Ceacam1	521	3.07913e+06	2.39273e+06	2.13685e+06	1.49986e+06	1.39141e+06	1.41931e+06	2.53624e+06	1.43686e+06	1.76513	0.0578933
91	Q62395	Trefoil factor 3	Tff3	81	4.66686e+06	4.58482e+06	4.58251e+06	1.42828e+07	1.22794e+07	1.30368e+07	4.6114e+06	1.31997e+07	0.349357	0.00451929
92	P05208	Chymotrypsin-like elastase family member 2A	Cela2a	271	579683	384118	375189	322462	243171	548553	446330	371395	1.20177	0.547467
93	E9Q6Y6	Enteropeptidase	Tmprss15	1054	693926	583702	741077	715870	721997	832321	672902	756729	0.889224	0.23807
94	J3QPG5	Prosaposin	Psap	557	5.25661e+06	4.54295e+06	5.1287e+06	5.00474e+06	5.25762e+06	5.85837e+06	4.97609e+06	5.37358e+06	0.926029	0.302506
95	Q6GT24	Peroxiredoxin 6	Prdx6	224	947186	2.64207e+06	2.81853e+06	221457	435340	276816	2.13593e+06	311205	6.86342	0.090664
96	Q5M9K1	Transthyretin	Ttr	147	439151	623322	753202	8.93067e+06	8.50921e+06	9.28714e+06	605225	8.909e+06	0.0679341	0.000143216
97	Q3V0K9	Plastin-1	Pls1	630	1.26801e+06	1.2436e+06	1.67779e+06	267145	159259	179130	1.39647e+06	201845	6.91852	0.010423
98	Q8K0C9	GDP-mannose 4,6 dehydratase	Gmds	372	1.12897e+06	1.44278e+06	2.08666e+06	107536	138993	151893	1.5528e+06	132808	11.6921	0.0369652
99	Q542G9	Annexin	Anxa2	339	494475	463300	644753	221364	154677	180148	534176	185396	2.88127	0.0164465
100	Q504N0	Carboxypeptidase A2	Cpa2	417	3.30179e+06	1.70461e+06	1.58682e+06	107109	50624.5	151166	2.19774e+06	102966	21.3443	0.0627892
101	Q00898	Alpha-1-antitrypsin 1-5	Serpina1e	413	2.1088e+06	1.39033e+06	1.45092e+06	241982	276868	322133	1.65002e+06	280328	5.88602	0.0260707
102	Q9DBX3	Sushi domain-containing protein 2	Susd2	820	1.18597e+06	1.55128e+06	1.83371e+06	159605	136369	183280	1.52366e+06	159751	9.53768	0.0179569
103	O88428	Bifunctional 3'-phosphoadenosine 5'-phosphosulfate synthase 2	Papss2	621	303587	452142	704592	80301.8	98453.7	106487	486774	95080.9	5.11957	0.0782441
104	Q4FK56	Gamma-glutamyltransferase 1, isoform CRA_a	Ggt1	568	629886	842581	1.27359e+06	1.163e+06	1.01122e+06	1.18131e+06	915351	1.11851e+06	0.818366	0.397428
105	P17892	Pancreatic lipase-related protein 2	Pnliprp2	482	1.45552e+06	1.09836e+06	1.25138e+06	236074	265421	280317	1.26842e+06	260604	4.86721	0.0095098
106	Q6YI28	EP1	2210407C18Rik	220	863828	738383	746907	1.73746e+06	1.72856e+06	2.00705e+06	783039	1.82436e+06	0.429214	0.00271147
107	P08228	Superoxide dismutase [Cu-Zn]	Sod1	154	635735	1.31577e+06	897947	1.50811e+06	1.64073e+06	1.93701e+06	949818	1.69529e+06	0.560271	0.0423764
108	Q64521	Glycerol-3-phosphate dehydrogenase, mitochondrial	Gpd2	727	801069	827308	1.3263e+06	34865.2	62600.6	71349.6	984893	56271.8	17.5024	0.0317796
109	Q543J5	Antithrombin	Serpinc1	465	578401	378168	443008	340384	394805	303585	466525	346258	1.34733	0.167243
110	Q9QXI6	SGLT1 protein	Slc5a1	665	1.00763e+06	859509	1.14699e+06	506877	726600	571251	1.00471e+06	601576	1.67013	0.020774
111	G5E8N5	L-lactate dehydrogenase	Ldha	361	499548	950102	1.06535e+06	317680	348924	194182	838334	286928	2.92175	0.0765306
112	Q9JLT2	Trehalase	Treh	576	484071	482649	585076	449304	422301	546474	517265	472693	1.09429	0.429566
113	P40142	Transketolase	Tkt	623	351102	427505	475955	54887.2	116340	60830.3	418187	77352.4	5.40626	0.00341256
114	P63017	Heat shock cognate 71 kDa protein	Hspa8	646	388557	660162	646687	102665	164997	93448.4	565135	120370	4.69498	0.0308866
115	Q9D7P9	Serpin B12	Serpinb12	423	219207	175261	243346	643028	566801	710673	212605	640167	0.332108	0.00314747
116	Q60930	Voltage-dependent anion-selective channel protein 2	Vdac2	295	425395	590599	1.0051e+06	166827	156025	202304	673699	175052	3.84856	0.10071
117	Q3UKW2	Calmodulin	Calm1	197	1.17469e+06	1.299e+06	1.71686e+06	1.09332e+06	877487	853703	1.39685e+06	941505	1.48363	0.0915048
118	Q6ZQM8	UDP-glucuronosyltransferase 1-7C	Ugt1a7c	531	78717	130525	172556	27273.7	25288.1	32504.1	127266	28355.3	4.48826	0.066839
119	Q5FW97	Alpha-enolase	EG433182	434	167511	509675	539504	127546	197074	88208.9	405563	137610	2.9472	0.146298
120	Q9DCM0	Persulfide dioxygenase ETHE1, mitochondrial	Ethe1	254	1.45497e+06	1.64379e+06	1.95178e+06	91866.7	86810.5	73208.1	1.68351e+06	83961.8	20.051	0.00802184
121	Q3TS38	UDP-glucose 6-dehydrogenase	Ugdh	493	259447	512207	633709	68238.1	69702	63188.9	468454	67043	6.98737	0.0677838
122	P09103	Protein disulfide-isomerase	P4hb	509	386654	598590	762645	91654.7	47378.9	71450.7	582630	70161.4	8.30413	0.0406154
123	Q91V76	Ester hydrolase C11orf54 homolog	1		1.12385e+06	1.22396e+06	1.55824e+06	44051.2	50832.4	27884.7	1.30202e+06	40922.8	31.8165	0.0105154
124	Q8R016	Bleomycin hydrolase	Blmh	455	381727	391301	357353	76973.8	68812.7	76020.1	376793	73935.5	5.09624	0.000591844
125	P97384	Annexin A11	Anxa11	503	184492	140685	218008	252918	235121	236705	181061	241581	0.749485	0.10604
126	A0A0R4J0B2	Phospholipase B-like 1	Plbd1	550	260397	283303	370261	118833	122955	142079	304654	127956	2.38094	0.0294759
127	Q9DB77	Cytochrome b-c1 complex subunit 2, mitochondrial	Uqcrc2	453	672132	753664	910501	34321.2	52492.9	50183.4	778766	45665.8	17.0536	0.0086386
128	Q4KML7	Ezrin	Ezr	586	422257	353136	432437	92038	129313	105433	402610	108928	3.69611	0.00252423
129	P52480	Pyruvate kinase PKM	Pkm	531	245333	548125	544577	45000.6	101974	47038.6	446012	64671.2	6.8966	0.0583561
130	Q3KN89	Transporter	Slc6a19	634	694192	696987	826583	458882	454795	452697	739254	455458	1.6231	0.0227116
131	Q03265	ATP synthase subunit alpha, mitochondrial	Atp5a1	553	769453	917083	1.02239e+06	57756.8	72612.9	84044.5	902976	71471.4	12.6341	0.00720337
132	Q9CPN9	Protein 2210010C04Rik	2210010C04Rik	247	5.55289e+06	2.2578e+06	1.25184e+06	562769	401371	981611	3.02084e+06	648584	4.6576	0.207607
133	Q99JG3	Annexin A13	Anxa13	317	183209	226649	199535	275140	364493	278499	203131	306044	0.663732	0.0551914
134	Q9CZ13	Cytochrome b-c1 complex subunit 1, mitochondrial	Uqcrc1	480	873303	966904	1.09883e+06	45189.7	52668.5	58733.6	979678	52197.3	18.7688	0.00481507
135	Q8VC28	Aldo-keto reductase family 1 member C13	Akr1c13	323	54785.2	82406.2	64902.9	33761.7	5120.46	56989.8	67364.7	31957.3	2.10796	0.12714
136	Q545N7	Creatine kinase U-type, mitochondrial	Ckmt1	418	1.46558e+06	1.65689e+06	2.17221e+06	147775	49347.4	109296	1.76489e+06	102139	17.2792	0.0144224
137	Q9JJ00	Phospholipid scramblase 1	Plscr1	328	103065	58246.5	108449	591004	577104	567777	89920	578628	0.155402	0.000205277
138	Q3UPA1	Guanine nucleotide binding protein, alpha 11	Gna11	359	343002	393973	592628	79465.7	145928	111999	443201	112464	3.94082	0.0420981
139	O09159	Lysosomal alpha-mannosidase	Man2b1	1013	204533	311222	251306	125652	93540.3	127272	255687	115488	2.21396	0.0335848
140	E9PWP7	Protein Muc3	Muc3	378	218895	150233	141799	1.07164e+06	1.08783e+06	1.10955e+06	170309	1.08967e+06	0.156294	9.79072e-05
141	Q3TLX9	Acid sphingomyelinase-like phosphodiesterase 3b	Smpdl3b	456	414782	442654	566714	392005	245539	312590	474717	316711	1.49889	0.0668704
142	G5E8T9	Hydroxyacyl glutathione hydrolase	Hagh	309	762025	773710	951582	104883	69411	111691	829106	95328.6	8.69735	0.00521401
143	Q8VCN5	Cystathionine gamma-lyase	Cth	398	1.17498e+06	1.15597e+06	1.30562e+06	48670.9	24903.9	17686.2	1.21219e+06	30420.3	39.848	0.00110121
144	D3Z6V6	Protein Enpp7	Enpp7	446	620919	840133	1.1022e+06	121908	103266	68403.5	854418	97859	8.73111	0.0308394
145	Q9CQC2	Colipase	Clps	113	1.61066e+07	9.11148e+06	7.78815e+06	962137	758639	1.30532e+06	1.10021e+07	1.0087e+06	10.9072	0.0601563
146	P08249	Malate dehydrogenase, mitochondrial	Mdh2	338	325322	750674	907486	96742.6	104180	118389	661161	106437	6.21174	0.0856308
147	Q99MZ6	Unconventional myosin-VIIb	Myo7b	2113	95252.3	97805.4	129462	75814.9	137321	105768	107507	106302	1.01134	0.957277
148	E9Q409	Protein Prss32	Prss32	334	656227	546745	670213	1.03309e+06	1.09575e+06	1.09659e+06	624395	1.07514e+06	0.580755	0.0018331
149	Q4FJX9	Superoxide dismutase	Sod2	222	208982	260289	302461	103645	134376	135007	257244	124343	2.06883	0.0268689
150	A0A0G2JEU7	Protein Ighv1-82 (Fragment)	Ighv1-82	117	10591.4	42970.6	40010.9	52623.2	14591.9	124802	31191	64005.7	0.487315	0.420437
151	P54869	Hydroxymethylglutaryl-CoA synthase, mitochondrial	Hmgcs2	508	706618	1.55257e+06	1.82904e+06	116862	120349	194961	1.36274e+06	144057	9.45976	0.0681124
152	Q3ULT2	Actinin alpha 4	Actn4	912	216412	354314	395542	27128.6	36912.7	12789.3	322090	25610.2	12.5766	0.030044
153	Q3ULA4	Choline transporter-like protein 4	Slc44a4	707	879451	985437	1.25602e+06	1.1639e+06	1.29296e+06	1.21718e+06	1.0403e+06	1.22468e+06	0.849447	0.236691
154	A0A075B5P2	Protein Igkc (Fragment)	Igkc	107	720291	1.04422e+06	1.61413e+06	1.63828e+06	2.59721e+06	1.60838e+06	1.12621e+06	1.94796e+06	0.578151	0.12319
155	P58252	Elongation factor 2	Eef2	858	79056	170809	142899	28038.5	23790.6	30311.2	130921	27380.1	4.78161	0.0617296
156	F6WR04	Cathepsin S	Ctss	341	199587	252484	282282	590360	469085	477205	244784	512217	0.477892	0.00752972
157	Q548F2	Guanine deaminase	Gda	454	440446	635652	1.12294e+06	49117.2	37164.5	36961.2	733014	41081	17.8432	0.0762524
158	Q60932	Voltage-dependent anion-selective channel protein 1	Vdac1	296	462204	611652	895289	243994	204839	275008	656381	241280	2.72041	0.0787224
159	A0A0R4J190	ADP-ribosyl cyclase/cyclic ADP-ribose hydrolase 2	Bst1	311	479420	664307	664457	516831	470422	507593	602728	498282	1.20961	0.228598
160	P17751	Triosephosphate isomerase	Tpi1	299	129673	362368	331220	111619	189765	74293.5	274420	125226	2.1914	0.166261
161	Q9Z0Y2	Phospholipase A2	Pla2g1b	146	8.78104e+06	5.04512e+06	4.94341e+06	322231	436212	553821	6.25652e+06	437421	14.3032	0.0436456
162	Q80T03	Mucin-6	Muc6	2850	690958	655131	796639	915739	958671	1.07335e+06	714243	982587	0.726901	0.0136254
163	Q9Z0L8	Gamma-glutamyl hydrolase	Ggh	317	694141	672652	710479	270598	145021	158698	692424	191439	3.61695	0.00389038
164	Q9JKA5	Cell surface A33 antigen	Gpa33	319	1.42916e+06	1.63871e+06	1.96015e+06	505992	404821	552960	1.67601e+06	487925	3.43497	0.0116226
165	Q02013	Aquaporin-1	Aqp1	269	145376	315429	457340	452464	408961	414513	306048	425313	0.719584	0.316222
166	A0A0R4J107	Acylamino-acid-releasing enzyme (Fragment)	Apeh	716	696988	721142	846633	62581.5	48582.8	44402.7	754921	51855.6	14.5581	0.0039062
167	Q9R112	Sulfide:quinone oxidoreductase, mitochondrial	Sqrdl	450	299037	408576	491448	12851.4	22696.2	27760.1	399687	21102.6	18.9402	0.0204478
168	Q9CPX4	Ferritin	Ftl1	183	574804	746529	772343	72472.6	75425.8	66470.1	697892	71456.2	9.76671	0.00955298
169	E9PYN9	Amine oxidase	Aoc1	756	411424	401573	436200	33667.5	37314.5	30897.5	416399	33959.8	12.2615	0.000511451
170	P14434	H-2 class II histocompatibility antigen, A-B alpha chain	H2-Aa	256	775959	609224	752412	24241.2	19719.6	31782.6	712532	25247.8	28.2215	0.00552498
171	Q80X90	Filamin-B	Flnb	2602	807039	830020	833714	56881.1	40848.9	36206.3	823591	44645.5	18.4474	4.94591e-07
172	Q544B1	Aldehyde dehydrogenase 2, mitochondrial, isoform CRA_b	Aldh2	519	129185	236477	345098	33250.6	38193.4	48138.9	236920	39861	5.94367	0.0864441
173	P00920	Carbonic anhydrase 2	Ca2	260	172953	343270	291595	94563.5	236185	64236.7	269273	131662	2.04519	0.13324
174	Q5SVY2	Peptidyl-prolyl cis-trans isomerase	Ppia	164	665228	1.18308e+06	1.19379e+06	284208	529700	190845	1.01403e+06	334918	3.02771	0.0393147
175	P06745	Glucose-6-phosphate isomerase	Gpi	558	242283	349944	402214	32557.3	58941.9	26387.9	331480	39295.7	8.43553	0.0211495
176	Q8K2B3	Succinate dehydrogenase [ubiquinone] flavoprotein subunit, mitochondrial	Sdha	664	505667	462578	507682	15359.4	9863.47	13225.8	491976	12816.2	38.387	0.000833434
177	Q7JCZ1	Cytochrome c oxidase subunit 2	mt-Co2	227	1.6732e+06	1.89234e+06	2.34782e+06	391474	384731	432246	1.97112e+06	402817	4.89334	0.0152639
178	P02535	Keratin, type I cytoskeletal 10	Krt10	570	189295	178743	195930	297410	325479	391886	187989	338258	0.555757	0.0297782
179	I7HPW8	Protein Myo15b	Myo15b	3033	102994	111742	188466	86228.7	88460.8	79401.5	134401	84697	1.58684	0.207617
180	Q3UAI3	CD36 antigen, isoform CRA_a	Cd36	472	89720.1	156894	230250	459356	433794	527936	158955	473695	0.335563	0.00457307
181	P09528	Ferritin heavy chain	Fth1	182	1.05437e+06	1.22519e+06	1.35911e+06	103773	96818.7	82018.8	1.21289e+06	94203.6	12.8752	0.00594637
182	Q61598	Rab GDP dissociation inhibitor beta	Gdi2	445	222029	400466	499121	38055.2	53685.9	63545.8	373872	51762.3	7.22287	0.0567963
183	P01592	Immunoglobulin J chain	Jchain	159	1.18257e+06	1.46951e+06	1.73932e+06	1.16379e+06	1.40244e+06	1.13023e+06	1.4638e+06	1.23215e+06	1.188	0.291751
184	P12787	Cytochrome c oxidase subunit 5A, mitochondrial	Cox5a	146	218786	224472	301258	16696.9	13862.6	24442.6	248172	18334	13.5361	0.0122187
185	Q1RME4	CAR-like soluble protein	Gm1123	390	1.22277e+06	1.11409e+06	1.2028e+06	156511	189914	228519	1.17989e+06	191648	6.15653	6.23669e-05
186	Q3TD53	H-2 class II histocompatibility antigen, A-F beta chain	H2-Ab1	265	765694	738506	1.06043e+06	26247.6	30702.6	19977.3	854876	25642.5	33.3382	0.0150352
187	Q3UU48	Prolactin induced protein, isoform CRA_c	Pip	146	1.16813e+06	719023	440914	70419.5	19431.3	124802	776023	71550.8	10.8458	0.0769075
188	P09055	Integrin beta-1	Itgb1	798	298846	345748	462247	128451	144939	64501	368947	112630	3.27574	0.018697
189	A2CGB6	Major urinary protein 6	Mup6	180	585153	611348	471939	50929.8	54955.4	69323.3	556146	58402.8	9.52259	0.0065742
190	A6ZI44	Fructose-bisphosphate aldolase	Aldoa	418	213421	440143	418562	42085.1	85386.3	56921.2	357375	61464.2	5.81437	0.0509028
191	Q545P0	Sodium/potassium-transporting ATPase subunit beta	Atp1b1	304	425334	489304	774828	181716	141511	171712	563156	164980	3.41349	0.0639747
192	Q9WVC8	Chloride anion exchanger	Slc26a3	757	740877	798139	1.01787e+06	178980	243931	229748	852294	217553	3.91764	0.0135733
193	G3X9Y6	Aldo-keto reductase family 1, member C19	Akr1c19	323	220683	331667	394971	166004	35899.8	75255.7	315774	92386.4	3.41797	0.0280082
194	Q14AJ3	Lipocalin 3	Lcn3	187	416400	364692	383268	385275	399296	376287	388120	386953	1.00302	0.948531
195	Q9Z0K8	Pantetheinase	Vnn1	512	607687	636277	720060	53364	41314.4	55470.8	654675	50049.7	13.0805	0.00270495
196	P19157	Glutathione S-transferase P 1	Gstp1	210	317590	454402	521277	112017	170604	70445	431090	117689	3.66296	0.0197381
197	Q8R3G9	Tetraspanin-8	Tspan8	235	1.44011e+06	1.53905e+06	1.90341e+06	2.69936e+06	3.00373e+06	2.98185e+06	1.62752e+06	2.89498e+06	0.562189	0.00276774
198	P37804	Transgelin	Tagln	201	127595	419626	163998	29651.2	41189.5	7735.22	237073	26192	9.05138	0.147147
199	A0A075B5X3	Protein Ighv1-64 (Fragment)	Ighv1-64	117	4254.68	3063.8	1311.16	14073.7	9219.62	18618.1	2876.55	13970.5	0.205902	0.0445024
200	Q9Z2H7	PDZ domain-containing protein GIPC2	Gipc2	314	21648.2	30035.9	40905.8	40974.6	46751.3	53361.9	30863.3	47029.3	0.656257	0.0822204
201	B1ASZ3	Glycerol kinase	Gk	552	376531	412214	566893	33648.9	24902.7	25227.9	451879	27926.5	16.181	0.018269
202	O54990	Prominin-1	Prom1	867	67769.5	81802	136458	73323.7	135953	103814	95343	104364	0.913565	0.76114
203	A2AE89	Glutathione S-transferase Mu 1	Gstm1	244	203332	312515	298772	35739.7	39124.4	24195.1	271540	33019.8	8.22355	0.0186764
204	D9J349	Intelectin 1	Itln1	313	221675	196024	239379	35491.9	70746.9	30973.9	219026	45737.6	4.78875	0.000622019
205	P12265	Beta-glucuronidase	Gusb	648	240978	213627	236742	172738	152343	185910	230449	170331	1.35295	0.0101512
206	Q5SX50	Profilin	Pfn1	140	261617	651445	531853	60555.7	75943.6	88936.7	481638	75145.3	6.40943	0.0711683
207	Q9CPU4	Microsomal glutathione S-transferase 3	Mgst3	153	372636	693207	698193	338101	242528	320231	588012	300287	1.95817	0.107403
208	P35700	Peroxiredoxin-1	Prdx1	199	398112	654637	865832	59578.3	137369	78597.3	639527	91848.2	6.96287	0.0521344
209	Q545A2	ADP/ATP translocase 2	Slc25a5	298	660942	804503	1.17293e+06	115484	137171	133514	879457	128723	6.83217	0.0386314
210	Q8R0F8	Acylpyruvase FAHD1, mitochondrial	Fahd1	227	629203	590908	731829	172985	252101	284519	650646	236535	2.75074	0.00186761
211	Q8C253	Galectin	Lgals3	264	89152.8	172677	316227	230616	222093	193010	192685	215239	0.895215	0.767771
212	Q99PT1	Rho GDP-dissociation inhibitor 1	Arhgdia	204	630949	1.041e+06	1.20786e+06	61182.3	92011.6	60601.7	959937	71265.2	13.4699	0.0348298
213	P63101	14-3-3 protein zeta/delta	Ywhaz	245	319998	521177	553495	38335.5	84217.7	53869	464890	58807.4	7.9053	0.0275222
214	Q04447	Creatine kinase B-type	Ckb	381	83763	320911	125142	52269.7	145036	10582.1	176605	69296	2.54856	0.285434
215	Q99JW5	Epithelial cell adhesion molecule	Epcam	315	265737	378936	609902	64288	57040	51076.8	418191	57468.2	7.27691	0.070373
216	Q8R429	Sarcoplasmic/endoplasmic reticulum calcium ATPase 1	Atp2a1	994	638948	253544	275520	131775	151331	146100	389337	143069	2.72133	0.1873
217	Q14BW6	Deoxyribonuclease	Dnase1	284	456948	504531	541158	6177.33	6568.58	7302.85	500879	6682.92	74.9492	0.00242068
218	P10605	Cathepsin B	Ctsb	339	405480	328475	354969	54038.8	56222.3	35560.6	362975	48607.2	7.46751	0.00294192
219	Q3UW56	Carboxylic ester hydrolase	Ces1g	565	74901.1	136001	128847	12151.2	9091.06	47927.4	113250	23056.6	4.91182	0.0230278
220	Q497E4	Actin, alpha cardiac muscle 1	Actc1	377	2.89168e+06	2.93142e+06	3.27064e+06	197324	244269	231106	3.03125e+06	224233	13.5183	0.00162159
221	A0A0R4J083	Long-chain-specific acyl-CoA dehydrogenase, mitochondrial	Acadl	430	283010	275064	267909	25231.2	19124.8	13069.5	275328	19141.8	14.3836	2.20738e-06
222	P09411	Phosphoglycerate kinase 1	Pgk1	417	332467	383576	396471	67196.9	125707	39532	370838	77478.7	4.78632	0.00106044
223	P70441	Na(+)/H(+) exchange regulatory cofactor NHE-RF1	Slc9a3r1	355	1.06095e+06	961675	1.26716e+06	145443	149729	135263	1.0966e+06	143478	7.64297	0.00867607
224	A0A0R4J0B6	ATP-binding cassette sub-family G member 2	Abcg2	657	194719	213616	317967	52985.6	65715	48355.5	242101	55685.4	4.34766	0.0376542
225	Q9R0H0	Peroxisomal acyl-coenzyme A oxidase 1	Acox1	661	408954	488124	609104	25160.1	13893	22458.9	502061	20504	24.486	0.0140543
226	Q8K1H9	Odorant-binding protein 2a	Obp2a	176	1.26288e+06	985180	1.15435e+06	456844	389075	436068	1.13414e+06	427329	2.65402	0.00947394
227	D3YVN7	Elongation factor Tu	Gm9755	452	8.85066e+06	7.57903e+06	6.51749e+06	13362.7	12020.5	23681.5	7.64906e+06	16354.9	467.692	0.00771611
228	Q5NC41	Protein 1810065E05Rik	1810065E05Rik	235	1.17267e+06	1.19191e+06	1.31707e+06	458027	523866	524420	1.22721e+06	502105	2.44414	0.000870669
229	Q53YP5	Fatty acid binding protein 2, intestinal	Fabp2	132	434577	430688	386706	93085	94678.5	81567.5	417323	89777	4.64844	0.00119863
230	G3X8T9	Serine (Or cysteine) peptidase inhibitor, clade A, member 3N, isoform CRA_a	Serpina3n	418	57273.1	35312.3	78102.2	139103	139085	139677	56895.9	139288	0.408475	0.0217284
231	P70665	Sialate O-acetylesterase	Siae	541	77926	82359.4	110980	101128	78227.6	92592.1	90421.9	90649.2	0.997493	0.986313
232	E9PZF0	Nucleoside diphosphate kinase	Gm20390	267	508908	629421	680586	52397.1	67395.9	28257.1	606305	49350	12.2858	0.00615865
233	P51162	Gastrotropin	Fabp6	128	1.40938e+06	1.71751e+06	2.03573e+06	408241	338530	264829	1.72087e+06	337200	5.10342	0.0131865
234	O88844	Isocitrate dehydrogenase [NADP] cytoplasmic	Idh1	414	264836	377895	420758	51426.1	47959.9	24263.5	354496	41216.5	8.60082	0.0186098
235	Q5SUC8	Uridine phosphorylase	Upp1	311	623276	767004	1.43472e+06	17031.6	17342.7	19388.2	941665	17920.8	52.5458	0.0660639
236	Q99LC5	Electron transfer flavoprotein subunit alpha, mitochondrial	Etfa	333	276498	377265	362342	15877	15933.8	13746.5	338702	15185.8	22.3039	0.00926035
237	Q9CR68	Cytochrome b-c1 complex subunit Rieske, mitochondrial	Uqcrfs1	274	830713	913478	1.02076e+06	40473.2	47435.1	64400.8	921650	50769.7	18.1536	0.00350625
238	Q8BK48	Pyrethroid hydrolase Ces2e	Ces2e	559	69615.2	113090	130901	20133.6	15996	16801.5	104535	17643.7	5.92481	0.0406021
239	Q5SX39	Myosin-4	Myh4	1939	556385	430949	345867	37956.3	48045.1	51992.8	444400	45998.1	9.66127	0.0223258
240	Q00897	Alpha-1-antitrypsin 1-4	Serpina1d	413	1.18506e+06	1.28709e+06	1.68293e+06	452779	580168	632280	1.38502e+06	555076	2.4952	0.0221064
241	P50446	Keratin, type II cytoskeletal 6A	Krt6a	553	105454	55430.2	56201.5	18626.4	10834.4	18497.5	72361.7	15986.1	4.52654	0.0730988
242	D3YYJ7	Pentaxin	Mptx2	219	2.34334e+06	1.7297e+06	2.3364e+06	138708	242438	176502	2.13648e+06	185883	11.4937	0.00948508
243	A2RSV8	Cytochrome c oxidase subunit 4 isoform 1, mitochondrial	Cox4i1	169	712668	838649	1.20693e+06	164034	139449	157260	919417	153581	5.98653	0.0352276
244	B2RTM0	Histone H4	Hist2h4	103	1.90333e+06	1.90066e+06	2.49528e+06	598809	865218	855277	2.09975e+06	773101	2.71602	0.0111578
245	Q8VEM8	Phosphate carrier protein, mitochondrial	Slc25a3	357	183036	178852	258569	18234.9	18753.5	13050	206819	16679.5	12.3996	0.0176623
246	Q792Z7	D(B) glycoprotein	H2-D1	362	214816	138887	183962	16111.1	16748.3	26658.7	179221	19839.4	9.03363	0.0167563
247	Q9Z0J0	Epididymal secretory protein E1	Npc2	149	130620	88057.4	113794	628586	813825	868938	110824	770450	0.143843	0.0102633
248	Q3UNI8	D-dopachrome decarboxylase	Ddt	118	532303	614305	581221	89716.3	78847.2	112360	575943	93641.3	6.15053	0.000662197
249	P50544	Very long-chain specific acyl-CoA dehydrogenase, mitochondrial	Acadvl	656	326195	334463	357261	16177.1	22025.7	34571.3	339306	24258	13.9874	5.07167e-05
250	P05201	Aspartate aminotransferase, cytoplasmic	Got1	413	115793	215350	293729	120793	129550	125689	208291	125344	1.66175	0.248286
251	Q4VAE6	Ras family member A	Rhoa	193	180405	172247	188127	55397.8	67497.2	43044.3	180260	55313.1	3.2589	0.000310071
252	A0A0A6YY41	Protein Ighv1-47 (Fragment)	Ighv1-47	117	24079.7	45833	119270	104487	152413	50748.4	63060.8	102549	0.614931	0.39138
253	Q3TX38	Voltage-dependent anion-selective channel protein 3	Vdac3	283	333155	388868	546363	176589	142435	200987	422795	173337	2.43915	0.0515168
254	Q9DCW4	Electron transfer flavoprotein subunit beta	Etfb	255	261145	325399	366827	15891.4	12429.8	12507.2	317790	13609.4	23.3507	0.00998387
255	Q91XF2	Protein Tm4sf5	Tm4sf5	196	45760.3	86781.8	43024.4	505893	380759	442283	58522.1	442979	0.13211	0.00390806
256	J3QP71	Basigin (Fragment)	Bsg	197	236996	266199	330411	31559	22346.5	32770.1	277869	28891.9	9.61754	0.0111942
257	Q99KI0	Aconitate hydratase, mitochondrial	Aco2	780	34959.9	120530	142837	16940.5	18818.6	20328.2	99442.3	18695.8	5.31897	0.133281
258	Q9Z261	Claudin-7	Cldn7	211	396810	434799	472123	233943	205007	272135	434577	237028	1.83344	0.00259162
259	P27773	Protein disulfide-isomerase A3	Pdia3	505	243534	382018	368658	75536	38918.8	75394.6	331403	63283.1	5.23683	0.019882
260	Q8BMS1	Trifunctional enzyme subunit alpha, mitochondrial	Hadha	763	78656.8	138414	147862	4887.49	8141.47	3994.53	121644	5674.5	21.437	0.0328026
261	Q3TF14	Adenosylhomocysteinase	Ahcy	432	104182	208601	221469	28162.6	25056.2	14618.2	178084	22612.3	7.87552	0.0510245
262	Q8BFR4	N-acetylglucosamine-6-sulfatase	Gns	544	540072	476339	463857	61006.7	10848.6	10052.9	493423	27302.7	18.0723	0.000169866
263	P60766	Cell division control protein 42 homolog	Cdc42	191	137332	146459	199641	148924	61089.9	75901.5	161144	95305.1	1.69082	0.127208
264	Q9ES64	Harmonin	Ush1c	910	177103	96314.8	108836	51692.7	45583.1	41854.5	127418	46376.8	2.74746	0.0821837
265	B1ATI0	Aldehyde dehydrogenase	Aldh3a2	532	247614	269668	334866	47929.7	39669.8	50608.7	284050	46069.4	6.16569	0.0109529
266	Q9MD68	Cytochrome c oxidase subunit 1	mt-Co1	514	1.07668e+06	754924	566819	188894	127346	160725	799474	158988	5.02851	0.0481961
267	Q9QX97	Trefoil Factor 2/Spasmolytic polypeptide protein	Tff2	129	73124.6	83601.5	51687.7	2.45405e+06	2.22467e+06	2.4537e+06	69471.3	2.37747e+06	0.0292206	0.000941059
268	Q3UII2	Tetraspanin	Cd82	266	357710	374772	476756	325677	280846	316029	403079	307517	1.31075	0.110683
269	Q64522	Histone H2A type 2-B	Hist2h2ab	130	162584	163175	217426	71496.5	118255	104280	181062	98010.5	1.84737	0.0248335
270	A0A140T8M0	Protein Igkv1-117 (Fragment)	Igkv1-117	120	1399.59	9006.9	9980.27	16626.8	19980.7	13272.4	6795.59	16626.6	0.408717	0.0475587
271	B2RXY7	Carbonyl reductase 1	Cbr1	277	188617	273981	236764	54011.4	91972.2	59439.7	233121	68474.4	3.40449	0.0104296
272	Q3TA96	Lysosomal membrane glycoprotein 1, isoform CRA_c	Lamp1	406	524043	569651	724963	258594	202961	256546	606219	239367	2.53259	0.0193909
273	Q9DCD0	6-phosphogluconate dehydrogenase, decarboxylating	Pgd	483	106089	200806	202648	27626.9	16825.8	31289.1	169848	25247.3	6.72736	0.0430982
274	Q6NSR8	Probable aminopeptidase NPEPL1	Npepl1	524	222052	215378	304326	60784	69507.9	86881.5	247252	72391.1	3.4155	0.0199202
275	A0A140T8M2	Protein Igkv12-44 (Fragment)	Igkv12-44	116	35997.3	26961.5	31944.7	55299.8	38177.7	90990.1	31634.5	61489.2	0.514472	0.192115
276	Q01853	Transitional endoplasmic reticulum ATPase	Vcp	806	81956.3	173933	196979	16158.8	25497.7	10992.2	150956	17549.6	8.60171	0.0609222
277	Q60605	Myosin light polypeptide 6	Myl6	151	179492	185856	222599	28296.6	36673.8	31109.9	195982	32026.8	6.11933	0.0053789
278	Q07417	Short-chain specific acyl-CoA dehydrogenase, mitochondrial	Acads	412	190803	287906	336651	64282.9	28647.4	31057.7	271787	41329.4	6.57611	0.0263065
279	Q11011	Puromycin-sensitive aminopeptidase	Npepps	920	112446	158469	219016	11261.7	26003.8	23415.1	163310	20226.9	8.07392	0.0409439
280	P11352	Glutathione peroxidase 1	Gpx1	201	207540	281222	348765	38141.4	37556.3	63874.6	279176	46524.1	6.00066	0.0251682
281	Q56A15	Cytochrome c	Cycs	105	126286	142823	139404	56968	74239.6	77799.7	136171	69669.1	1.95454	0.00156782
282	P22599	Alpha-1-antitrypsin 1-2	Serpina1b	413	847661	624693	760855	345938	328427	383785	744403	352717	2.11048	0.0210583
283	A0A0R4J1V0	Na(+)/H(+) exchange regulatory cofactor NHE-RF3	Pdzk1	519	83771	79725.4	124479	30672.3	35243.7	27413.9	95991.9	31110	3.08557	0.0422556
284	Q6P069	Sorcin	Sri	198	163617	177122	196330	62895.3	58949	65030.3	179023	62291.5	2.87396	0.00523763
285	Q571E4	N-acetylgalactosamine-6-sulfatase	Galns	520	79357.6	100411	121496	48267.2	53477.9	48690.5	100422	50145.2	2.00262	0.0514406
286	P01027	Complement C3	C3	1663	19046.7	109040	65594.9	3445.74	10727.1	13976.6	64560.5	9383.15	6.88047	0.165948
287	Q3U9N4	Granulins	Grn	602	74464.7	70690.4	58774	133081	109339	129466	67976.4	123962	0.548365	0.00526084
288	Q4FK36	Destrin	Dstn	165	85122.9	151562	129316	54127.7	51214.3	46070.1	122000	50470.7	2.41725	0.0651037
289	Q5SS40	14-3-3 protein epsilon	Ywhae	255	111873	215174	229570	32371.9	21770.4	10880.6	185539	21674.3	8.56033	0.0441886
290	Q64442	Sorbitol dehydrogenase	Sord	357	180972	244599	234832	12471.6	15613.4	10088.4	220134	12724.5	17.3001	0.00863948
291	Q9CQA3	Succinate dehydrogenase [ubiquinone] iron-sulfur subunit, mitochondrial	Sdhb	282	142221	189134	235429	8350.75	15817.5	6401.91	188928	10190.1	18.5404	0.0209227
292	Q78ZJ8	MCG22989, isoform CRA_b	Rab11b	218	81506.1	141532	207801	65047.8	90207.1	36254.4	143613	63836.5	2.2497	0.147643
293	A2AEN9	Protein Gm5938	Gm5938	163	846114	317128	187402	5523.15	26954.8	23411.3	450214	18629.7	24.1664	0.165308
294	P59108	Copine-2	Cpne2	548	25683.4	48468.4	40175.9	34601.9	34158.6	37101.8	38109.3	35287.4	1.07997	0.714069
295	Q3V2F7	Fatty acid binding protein 1, liver	Fabp1	127	41298.3	162917	246498	480378	911947	886675	150238	759667	0.197768	0.0337291
296	P05202	Aspartate aminotransferase, mitochondrial	Got2	430	69383.5	135496	115461	29465.4	55291.7	33363.2	106780	39373.4	2.71199	0.0589608
297	E9QNP0	KxDL motif-containing protein 1	Kxd1	232	309221	327918	369366	405719	434645	417237	335501	419201	0.800337	0.0262668
298	P20029	78 kDa glucose-regulated protein	Hspa5	655	199145	239397	217531	8356.35	18310.6	28305.2	218691	18324.1	11.9346	0.000679123
299	A0A075B5T2	Protein Ighv6-3 (Fragment)	Ighv6-3	119	38772.2	24734.6	53203.2	93050.9	124515	125172	38903.3	114246	0.340523	0.005896
300	E9Q616	Protein Ahnak	Ahnak	5656	187299	184418	188328	56628.7	77235.9	59034.2	186682	64299.6	2.90331	0.00217112
301	P47791	Glutathione reductase, mitochondrial	Gsr	500	173945	223194	272141	10580	14308	9691.28	223093	11526.4	19.3549	0.0172855
302	O88312	Anterior gradient protein 2 homolog	Agr2	175	61223.1	249072	121709	31223.9	60012.2	24894.2	144001	38710.1	3.72	0.193875
303	Q3UW66	Sulfurtransferase	Mpst	297	19941.8	116900	149111	21679.9	30462.9	36929.2	95317.6	29690.6	3.21036	0.23187
304	Q8CBB6	Histone H2B	Hist1h2br	134	34281.4	36304.5	42153.2	26547.7	43821.4	39598.9	37579.7	36656	1.0252	0.882475
305	Q148B1	Cytochrome P450, family 2, subfamily c, polypeptide 65	Cyp2c65	490	60379.4	91178.7	114401	9639.69	11230.6	8627.5	88653	9832.58	9.01625	0.0369426
306	A5GZX3	Lactoylglutathione lyase	Glo1	184	378188	425413	456808	23881.9	39710.3	21453.1	420136	28348.4	14.8204	0.00211281
307	H3BJQ7	Peroxiredoxin-5, mitochondrial	Prdx5	213	176804	359769	509156	17039.5	43357.1	20048.5	348576	26815	12.9993	0.0777376
308	A0A140T8N5	Protein Igkv6-23 (Fragment)	Igkv6-23	116	189094	272234	242806	281678	122354	569592	234711	324541	0.72321	0.565392
309	Q8BWT1	3-ketoacyl-CoA thiolase, mitochondrial	Acaa2	397	60916.8	87133.7	87420.3	30290.8	16010.6	17592.9	78490.3	21298.1	3.68532	0.0103635
310	Q5EBQ2	MCG7941, isoform CRA_f	Pebp1	187	233883	335892	288825	8931.23	19447.3	14270.2	286200	14216.2	20.1319	0.0109088
311	Q3UWA6	Heat-stable enterotoxin receptor	Gucy2c	1072	163290	193413	214137	66162	92718.6	74912.8	190280	77931.1	2.44164	0.00643789
312	Q9D3H2	Odorant-binding protein 1a	Obp1a	163	379300	250031	259085	24251.5	48944.9	47422.2	296138	40206.2	7.36549	0.0222389
313	Q60604	Adseverin	Scin	715	86380.2	111511	144247	43770.5	39616.3	24255	114046	35880.6	3.17849	0.0316406
314	Q71LX8	Heat shock protein 84b	Hsp90ab1	724	51108.9	79140.2	87343.1	3966.36	5233.04	5344.94	72530.7	4848.11	14.9606	0.0251181
315	Q9WVJ3	Carboxypeptidase Q	Cpq	470	136898	157835	209300	59129.1	67796.2	64431.4	168011	63785.6	2.63399	0.0384519
316	Q61469	Phospholipid phosphatase 1	Plpp1	283	37303.3	40275.7	29559.1	61673.4	54096.5	63905.4	35712.7	59891.8	0.596288	0.00525568
317	P10639	Thioredoxin	Txn	105	318890	618710	615564	164789	307206	107835	517721	193277	2.67865	0.0614635
318	Q91WS0	CDGSH iron-sulfur domain-containing protein 1	Cisd1	108	210422	250768	315047	33529.8	21860.7	29766.5	258745	28385.7	9.11535	0.0160809
319	Q9D3Q9	Protein 2010106E10Rik	2010106E10Rik	269	109177	115349	146414	454335	432063	428728	123647	438375	0.282057	5.66933e-05
320	Q07076	Annexin A7	Anxa7	463	69172.1	73944.1	49818	55344.8	71619.4	66178.1	64311.4	64380.8	0.998922	0.994141
321	A2AIM4	Tropomyosin beta chain	Tpm2	284	39742.5	134511	64638.5	24119.7	31576.3	2481.59	79630.6	19392.6	4.10625	0.158998
322	A0A075B5R1	Protein Ighv5-17 (Fragment)	Ighv5-17	117	42641.3	58735.4	89565	23877.7	12493.5	20991.9	63647.2	19121	3.32865	0.076035
323	Q53X15	Protein S100	S100a8	89	77126.7	58154.7	67400	111311	99362.5	65788.2	67560.5	92153.8	0.733127	0.205252
324	Q792Y8	MCG15081	Gm10334	246	233483	96347.5	64380.9	247387	107915	184209	131404	179837	0.730681	0.504213
325	Q8K154	UDP-glucuronosyltransferase	Ugt2b34	532	183332	272325	340506	36195.1	30650.7	33273.7	265388	33373.2	7.95213	0.0362371
326	Q3U7Z6	MCG113582	Pgam1	254	23341.9	45012.4	40397.4	8551.19	13928.5	564.774	36250.5	7681.47	4.71921	0.029322
327	Q91WR8	Glutathione peroxidase 6	Gpx6	221	66421.2	65114.1	96683.6	37769.3	21991.1	37033.2	76073	32264.6	2.35779	0.0331811
328	Q91X72	Hemopexin	Hpx	460	95904.9	164785	167936	4950.23	31758.4	18418.2	142875	18375.6	7.77526	0.0246542
329	Q8QZR3	Pyrethroid hydrolase Ces2a	Ces2a	558	55526.7	70979.7	90830.5	1753.16	3697.6	1591.65	72445.7	2347.47	30.8611	0.0202134
330	Q5BKQ4	Inactive pancreatic lipase-related protein 1	Pnliprp1	473	78243.8	46925.4	39774.6	1399.92	664.944	1231.74	54981.3	1098.87	50.0345	0.0448109
331	Q9CQX2	Cytochrome b5 type B	Cyb5b	146	123269	177843	269314	16339.1	12746.3	9649.27	190142	12911.6	14.7265	0.052945
332	A2ANT5	MCG19332	Mup4	178	79724.8	94695.4	91986.7	8858.78	3812.68	1789.59	88802.3	4820.35	18.4224	0.000703436
333	P01654	Ig kappa chain V-III region PC 2880/PC 1229	1		25353.5	20804.1	17873.3	190951	599643	75119.6	21343.6	288571	0.0739632	0.235006
334	O08749	Dihydrolipoyl dehydrogenase, mitochondrial	Dld	509	178451	241757	235448	50379.1	38112.2	45075.4	218552	44522.3	4.90882	0.0112319
335	Q9CQY8	Transmembrane 4 L6 family member 20	Tm4sf20	226	16570.2	7781.13	20922.2	50178.5	64052.4	48058.9	15091.2	54096.6	0.278967	0.0043233
336	Q08189	Protein-glutamine gamma-glutamyltransferase E	Tgm3	693	282973	149572	212071	35744.6	42019.7	47581.6	214872	41782	5.14269	0.0451753
337	P01887	Beta-2-microglobulin	B2m	119	392375	372984	487057	14784	14673.5	26591.1	417472	18682.9	22.3452	0.0071477
338	Q924B0	Inositol (Myo)-1(Or 4)-monophosphatase 1	Impa1	277	30882.8	107535	120886	3989.62	8699.62	2525.51	86434.6	5071.58	17.0429	0.100449
339	Q54AA2	Apoptosis-associated speck-like protein containing CARD	Pycard	193	16027.7	72418.5	69122.2	15746.1	10723.9	3566.08	52522.8	10012	5.24597	0.140929
340	P17047	Lysosome-associated membrane glycoprotein 2	Lamp2	415	1.20601e+06	1.09043e+06	1.21944e+06	677427	683420	803190	1.17196e+06	721346	1.62469	0.0014715
341	Q5SW88	Protein Rab1a	Rab1a	202	186563	273434	330593	28171.7	44285.5	29586.4	263530	34014.5	7.74758	0.0301219
342	Q3UER1	Fructose-bisphosphate aldolase	Aldob	364	104342	129580	133232	29168.6	24069.1	32164.8	122385	28467.5	4.2991	0.00634779
343	E9QKR0	Guanine nucleotide-binding protein G(I)/G(S)/G(T) subunit beta-2	Gnb2	382	52041.2	57225.1	36750.8	11602	22941.3	15854.9	48672.4	16799.4	2.89726	0.0187462
344	Q3TTY5	Keratin, type II cytoskeletal 2 epidermal	Krt2	707	81489.1	91122.5	70547.6	87695.7	94297.1	116771	81053.1	99588.1	0.813883	0.16577
345	O70456	14-3-3 protein sigma	Sfn	248	139575	160730	189996	10816	20588.1	11474.6	163433	14292.9	11.4346	0.00731144
346	Q3TKP4	Fructose bisphosphatase 2	Fbp2	339	102877	162278	178970	13702.2	9047.51	8595.97	148042	10448.6	14.1686	0.0265286
347	A7VMV2	Crystallin, lamda 1, isoform CRA_a	Cryl1	319	108438	151426	204308	6106.31	3092.92	1714.82	154724	3638.01	42.5298	0.0318233
348	Q9WU81	Glucose-6-phosphate exchanger SLC37A2	Slc37a2	501	230851	269351	262552	34645.7	32735.9	23181	254251	30187.6	8.42239	0.00139644
349	P61971	Nuclear transport factor 2	Nutf2	127	85188.5	140571	135172	2069.99	3944.86	8470.8	120311	4828.55	24.9165	0.02149
350	Q3UAD6	Endoplasmin	Hsp90b1	802	15806.4	43791.1	23722.6	4042.12	2819.15	5198.06	27773.4	4019.78	6.90918	0.103107
351	Q99K30	Epidermal growth factor receptor kinase substrate 8-like protein 2	Eps8l2	729	121200	111332	127596	60796.7	93225.5	60313.4	120043	71445.2	1.68021	0.0315426
352	O88792	Junctional adhesion molecule A	F11r	300	29609.7	48550.1	93104.1	90447.7	63431.5	82811	57088	78896.7	0.723578	0.372303
353	P12815	Programmed cell death protein 6	Pdcd6	191	35224.7	23557.8	26650.3	49113.8	56322.6	48557	28477.6	51331.1	0.554782	0.0078662
354	Q9WVA4	Transgelin-2	Tagln2	199	67206.3	132688	97151.2	28526.4	27403.4	7278.78	99015.1	21069.5	4.69945	0.0413624
355	Q64444	Carbonic anhydrase 4	Ca4	305	100193	107787	123704	10131.3	7732.46	7184.06	110561	8349.27	13.242	0.00403998
356	A0A075B5V0	MCG114299 (Fragment)	Ighv1-26	117	1639.74	13649.7	10430.3	5760.61	5484.57	16978	8573.24	9407.74	0.911297	0.880685
357	Q6RI64	Proteasome subunit beta type	Psmb1	240	56779.9	77734.1	114442	3171.34	14448.2	10019.6	82985.3	9213.04	9.00737	0.0439612
358	G5E8B4	MCG147827	Scgb2b2	114	795917	532291	429380	49368.7	57834.6	67870.6	585863	58358	10.0391	0.0399575
359	Q3TMT3	Transmembrane 4 L6 family member 4	Tm4sf4	202	46043.3	46724	51162.8	837499	757769	873611	47976.7	822960	0.0582978	0.00190667
360	Q32NZ6	Transmembrane channel-like protein 5	Tmc5	967	69653.7	45392.4	89877.4	23036.6	49023.4	38146.5	68307.8	36735.5	1.85945	0.117953
361	Q9D7L8	Transmembrane and immunoglobulin domain-containing protein 1	Tmigd1	261	361713	381545	568012	555430	541446	579892	437090	558923	0.782022	0.202111
362	Q64374	Regucalcin	Rgn	299	54764.7	82211.1	71830.1	41834.7	21824.8	41485.5	69602	35048.3	1.98588	0.0307057
363	Q8CHP8	Glycerol-3-phosphate phosphatase	Pgp	321	32457.4	47412.7	57011.8	15033.1	6599.18	12006.2	45627.3	11212.8	4.0692	0.0298169
364	Q9ES88	Solute carrier family 13 member 2	Slc13a2	586	20468.8	30898.3	61410.9	146690	144346	147908	37592.7	146315	0.25693	0.0120647
365	E9PUL3	Protein Clca3b	Clca3b	1044	81577.5	70823.3	73485.3	1553.2	6558.36	10293.1	75295.4	6134.87	12.2733	0.000107128
366	P23492	Purine nucleoside phosphorylase	Pnp	289	73382.3	110398	94709.4	16725.3	15150.7	1481.86	92829.9	11119.3	8.34855	0.00778917
367	Q9D7S0	Ly6/PLAUR domain-containing protein 8	Lypd8	255	42130.6	38678.5	48273.4	122768	105111	111790	43027.5	113223	0.380025	0.00108311
368	P16015	Carbonic anhydrase 3	Ca3	260	30336.9	75759.2	46214	19494.2	3663.59	1936.11	50770	8364.62	6.06961	0.0695017
369	Q9QZN4	F-box only protein 6	Fbxo6	295	27366.9	14466.3	40410.7	30520.7	23918.6	27447.9	27414.7	27295.7	1.00436	0.988977
370	P61922	4-aminobutyrate aminotransferase, mitochondrial	Abat	500	36951.2	23418	24649.5	4392.79	2983.74	2627.11	28339.6	3334.55	8.49877	0.0270316
371	Q32P04	Keratin 5	Krt5	580	12806.6	26162.5	24200.2	11938.1	15034.6	19196	21056.4	15389.6	1.36823	0.312415
372	Q7JJ15	H-2 class I histocompatibility antigen, K-K alpha chain	H2-K1	369	167641	166433	225372	7329.4	7445.83	5767.5	186482	6847.58	27.2333	0.0114714
373	Q9D312	Keratin, type I cytoskeletal 20	Krt20	431	111141	129094	195477	20553.7	23379.3	24187.7	145237	22706.9	6.39618	0.0409088
374	A0A0B4J1H7	Protein Igkv1-135 (Fragment)	Igkv1-135	120	53686	111940	172387	45859.6	34595.4	39283.7	112671	39912.9	2.82293	0.166603
375	Q9DC50	Peroxisomal carnitine O-octanoyltransferase	Crot	612	53927	57110.2	45138.2	6386.19	1490.5	8557.35	52058.5	5478.01	9.50317	0.00108219
376	P68510	14-3-3 protein eta	Ywhah	246	10672.2	15716.1	19320.7	2965.38	856.041	1711.78	15236.3	1844.4	8.26086	0.027652
377	Q14BR4	ADP-ribosylation factor 4	Arf4	180	166671	242457	268715	22043.8	37793.6	33964.3	225947	31267.3	7.22633	0.0216907
378	Q544Z9	Cytochrome b-5, isoform CRA_d	Cyb5a	134	626278	652881	786297	21742.1	14705.2	13327.9	688485	16591.7	41.4957	0.00528371
379	Q545I9	Protein S100	S100a6	89	49522.1	19680.2	28058.3	74078.9	84183.9	31537.9	32420.2	63266.9	0.512435	0.189258
380	Q6NXH9	Keratin, type II cytoskeletal 73	Krt73	539	38432.6	36370.7	3720.04	42330	74011.6	114171	26174.4	76837.6	0.340646	0.119132
381	Q9CRY7	Glycerophosphodiester phosphodiesterase domain-containing protein 1	Gdpd1	314	146513	139753	126233	9799.01	9767.31	11580.8	137499	10382.4	13.2435	0.00200987
382	P05213	Tubulin alpha-1B chain	Tuba1b	451	35466	56317	76420.4	3948.13	5193.38	3919.04	56067.8	4353.52	12.8787	0.0483352
383	Q543E3	Suppressor of tumorigenicity 14 protein homolog	St14	855	122447	105132	187099	58678.1	53625.9	54106	138226	55470	2.49191	0.0794766
384	P14152	Malate dehydrogenase, cytoplasmic	Mdh1	334	113028	213586	189182	26366.3	22543.6	14976.9	171932	21295.6	8.07357	0.0367178
385	Q61425	Hydroxyacyl-coenzyme A dehydrogenase, mitochondrial	Hadh	314	119500	216059	225065	31784.7	41699.5	44614.2	186874	39366.1	4.74708	0.0470086
386	P51879	Oncomodulin	Ocm	109	46626.3	47207.6	45210.1	25972	23478.4	23611.5	46348	24354	1.9031	5.06867e-05
387	F6VW30	14-3-3 protein theta (Fragment)	Ywhaq	303	45444.4	116242	98578.5	6674.26	12433.1	8967.56	86754.9	9358.3	9.27037	0.0670829
388	Q5SUV8	Aromatic-L-amino-acid decarboxylase	Ddc	480	109109	117213	144986	14087.6	5601.33	4594.48	123769	8094.46	15.2906	0.00566548
389	P52787	Gastric intrinsic factor	Gif	417	50905	117771	155962	60168.5	56586.1	91374.1	108212	69376.3	1.55979	0.334307
390	Q545F0	MCG3124, isoform CRA_b	Mif	115	327644	348556	347431	38001	53615.1	23106.9	341210	38241	8.92263	1.86307e-05
391	A0A0B4J1J2	Protein Igkv5-43 (Fragment)	Igkv5-43	115	55473	53986.6	66246.1	93183	34286.6	42047.6	58568.5	56505.7	1.03651	0.922232
392	Q9WU78	Programmed cell death 6-interacting protein	Pdcd6ip	869	42730.7	68595.3	84092.6	35274.5	49901.9	40368.5	65139.5	41848.3	1.55656	0.184676
393	E9PVG8	Protein 9530053A07Rik	9530053A07Rik	2581	122545	97156.3	34180.2	106463	310815	355415	84627.2	257564	0.328568	0.141925
394	A0A0N4SW28	Guanine nucleotide-binding protein subunit gamma	Gng12	83	28811	43846.9	70658.7	619.311	7411.03	5329.97	47772.2	4453.44	10.727	0.0677637
395	E9Q5W5	Zinc finger ZZ-type and EF-hand domain-containing protein 1	Zzef1	2924	213515	224918	106204	121921	102321	121550	181546	115264	1.57504	0.219222
396	Q00519	Xanthine dehydrogenase/oxidase	Xdh	1335	37723.8	85274.6	116920	3378.02	3719.49	6316.33	79972.7	4471.28	17.8859	0.0814586
397	P15626	Glutathione S-transferase Mu 2	Gstm2	218	88589	135416	125615	11690.7	26552.7	10172.8	116540	16138.7	7.22112	0.0117506
398	P57716	Nicastrin	Ncstn	708	171280	165366	194344	67461.2	64592.3	82358.3	176997	71470.6	2.4765	0.00125712
399	P56391	Cytochrome c oxidase subunit 6B1	Cox6b1	86	34743.6	136582	146013	14674.4	26764.8	36119.6	105780	25852.9	4.09159	0.150347
400	Q8R086	Sulfite oxidase, mitochondrial	Suox	546	75712.8	97366.8	139231	3089	13872.1	5158.44	104104	7373.18	14.1192	0.0318912
401	Q3UP42	Protein S100-A9	S100a9	113	220946	260483	417760	83798.8	221957	62544.2	299730	122767	2.44146	0.088538
402	Q06138	Calcium-binding protein 39	Cab39	341	55073.8	61939.8	85281.1	21646.5	28443.8	23062.1	67431.6	24384.1	2.76539	0.0367229
403	Q3TI07	Calpain-1 catalytic subunit	Capn1	713	76470.2	115823	140800	137304	118121	7063.8	111031	87496.3	1.26898	0.637235
404	Q9NYQ2	Hydroxyacid oxidase 2	Hao2	353	295739	359255	373392	7277.5	14004.1	22403.6	342795	14561.8	23.5408	0.00418342
405	P55292	Desmocollin-2	Dsc2	902	176048	159857	169302	11454.9	9159.55	13217.2	168402	11277.2	14.9329	0.000472531
406	Q8BMD8	Calcium-binding mitochondrial carrier protein SCaMC-1	Slc25a24	475	95680.4	76398.3	106822	2415.36	30484	42169.8	92966.8	25023.1	3.71525	0.0119097
407	P70158	Acid sphingomyelinase-like phosphodiesterase 3a	Smpdl3a	445	220806	158286	209770	18998.3	14021.8	24580.5	196287	19200.2	10.2232	0.0101956
408	Q91WQ9	Calmodulin-like protein 4	Calml4	153	50970.6	60817.7	96175.1	30165.4	32447.7	18929.4	69321.1	27180.9	2.55037	0.0809697
409	Q9R0M5	Thiamin pyrophosphokinase 1	Tpk1	243	56124.8	75756.1	84069.3	7042.93	3551.83	27335.2	71983.4	12643.3	5.69339	0.00614229
410	D3YX03	Protein Gm7849	Gm7849	116	36754.2	41050.9	36149.2	1.02249e+06	1.06722e+06	935114	37984.8	1.00828e+06	0.037673	0.00157145
411	Q8BND5	Sulfhydryl oxidase 1	Qsox1	748	91118.2	79050.6	103423	19723.7	22591.1	2086.05	91197.4	14800.3	6.16187	0.00135548
412	Q8QZW3	Protein FAM151A	Fam151a	608	82312.2	99713.5	120028	358023	388957	359785	100685	368922	0.272916	5.7453e-05
413	P01647	Ig kappa chain V-V region HP 124E1	1		92763.8	169709	181306	31307.1	22756.7	25646.4	147926	26570.1	5.5674	0.0475844
414	Q542H7	Fabp4 protein	Fabp4	132	39553.2	180291	47644	49463.5	1326.39	4785.69	89162.8	18525.2	4.81306	0.257809
415	Q9CQ11	Protein 2010109I03Rik	2010109I03Rik	111	55717.9	51953.7	55027.8	83384	62221.9	70896.6	54233.1	72167.5	0.75149	0.0952307
416	Q93092	Transaldolase	Taldo1	337	84370.8	160952	144603	15470.8	11609.8	21401.5	129975	16160.7	8.04265	0.0376742
417	A0A075B5R9	Protein Ighv14-3 (Fragment)	Ighv14-3	117	128166	164229	144158	72106.9	51218	68666.9	145518	63997.3	2.27381	0.00493815
418	Q3UPK6	Proteasome subunit alpha type	Psma5	241	180354	202994	273856	2304.73	10836.3	21729.1	219068	11623.4	18.8472	0.0150765
419	Q6P5I3	S-(hydroxymethyl)glutathione dehydrogenase	Adh5	374	24580.6	18706.1	26653	34769.5	46544.2	38272.4	23313.2	39862	0.584848	0.0219244
420	P63038	60 kDa heat shock protein, mitochondrial	Hspd1	573	49155.4	74525.2	59822.9	6400.12	4921.22	3320.96	61167.8	4880.77	12.5324	0.0155636
421	Q58E64	Elongation factor 1-alpha	Eef1a1	462	86612.6	247925	207850	11822.4	17621.4	15158.3	180796	14867.4	12.1606	0.0756474
422	B1B1A8	Myosin light chain kinase, smooth muscle	Mylk	1950	43186	75788	51069.6	4493.02	23682	860.808	56681.2	9678.62	5.85633	0.0212885
423	F6TFF2	Pituitary tumor-transforming gene 1 protein-interacting protein (Fragment)	Pttg1ip	172	739.603	1173.27	1534.57	10404	300.154	8340.75	1149.15	6348.29	0.181017	0.233195
424	Q9QYZ9	Serine protease 30	Prss30	310	102772	81416.1	99617.3	20225.8	18308.8	18235.1	94601.8	18923.2	4.99924	0.00720906
425	A0A140T8N3	Protein Igkv13-84 (Fragment)	Igkv13-84	116	68612.6	8306.29	88075.9	33710.2	76970.5	15195.2	54998.3	41958.6	1.31077	0.689571
426	A0A0U1RPF3	Calcium and integrin binding 1 (Calmyrin), isoform CRA_a	Cib1	186	38392.2	35983.5	35464.9	46367.5	48387.7	49961.9	36613.5	48239	0.759002	0.00117549
427	O09131	Glutathione S-transferase omega-1	Gsto1	240	74555.6	96553.3	147453	6468.36	7921.65	6452.54	106187	6947.52	15.2842	0.0441425
428	P99026	Proteasome subunit beta type-4	Psmb4	264	54218.7	76756.4	31195.4	3171.85	7749.65	9541.31	54056.8	6820.94	7.92513	0.0667193
429	Q9DBP0	Sodium-dependent phosphate transport protein 2B	Slc34a2	697	174965	169688	248872	38699.7	95150.5	97896.9	197842	77249	2.56109	0.0224216
430	Q00623	Apolipoprotein A-I	Apoa1	264	64026.5	221025	116643	976.704	5746.81	5097.68	133898	3940.4	33.9809	0.106154
431	Q7TMM9	Tubulin beta-2A chain	Tubb2a	445	55287.7	120506	81673.2	13304.3	12178.6	10125.7	85822.2	11869.6	7.23044	0.0594442
432	Q542F1	Chloride intracellular channel protein	Clic1	241	31089.4	66936.1	38055.1	15030.8	16097.5	11049	45360.2	14059.1	3.2264	0.101334
433	A0A075B5R5	Protein Ighv4-1 (Fragment)	Ighv4-1	117	43724.5	12594.9	1580.62	7197.11	17303.9	14962.7	19300	13154.6	1.46717	0.678261
434	Q545G1	Myosin regulatory light chain 2, skeletal muscle isoform	Mylpf	169	49820	34711.8	25532.9	6465.08	6816.41	8488.78	36688.2	7256.76	5.05573	0.0522702
435	Q3UZZ6	Sulfotransferase 1 family member D1	Sult1d1	295	116162	210587	214531	26222.2	25249.7	19111.9	180427	23527.9	7.66863	0.0389522
436	Q4FK74	ATP synthase subunit delta, mitochondrial	Atp5d	168	122961	160748	210670	33260.9	18535.1	28405.9	164793	26734	6.16417	0.0292641
437	A0A075B5T6	Protein Ighv10-3 (Fragment)	Ighv10-3	119	213018	99594.1	15382.3	10009.1	15662.6	11188.2	109332	12286.6	8.89841	0.232114
438	B2MWM9	Calreticulin	Calr	416	41945.2	70492.5	71140.7	19150.2	16466.9	15123.8	61192.8	16913.6	3.61796	0.0423256
439	Q8BHH8	Clarin-3	Clrn3	226	248367	262197	303509	352553	360210	314584	271357	342449	0.792403	0.0320129
440	F8WGL3	Cofilin-1	Cfl1	227	43012.7	47765.3	61273.3	1000.22	4360.37	6157.07	50683.8	3839.22	13.2016	0.00928363
441	W4VSP4	Protein Serpinb6c	Serpinb6c	379	36291.2	46518.5	32105.1	34489.4	39079.7	39605.8	38304.9	37725	1.01537	0.908474
442	Q9D0F9	Phosphoglucomutase-1	Pgm1	562	69345.7	112432	121758	9917.36	13651.5	14110.4	101179	12559.7	8.05578	0.0308915
443	Q3U0B3	Dehydrogenase/reductase SDR family member 11	Dhrs11	260	41270.6	51636.7	62897.3	10176.5	8529.74	2135.37	51934.9	6947.19	7.47567	0.0104282
444	P48036	Annexin A5	Anxa5	319	39554.9	11921.2	19670.7	20201.7	22784.2	24169.3	23715.6	22385.1	1.05944	0.887018
445	Q4FK86	Peptidoglycan-recognition protein	Pglyrp1	182	278163	241982	305128	21559.1	25312.2	23526.7	275091	23466	11.723	0.00511837
446	Q9QUM9	Proteasome subunit alpha type-6	Psma6	246	58487	156634	187573	215993	113366	8297.38	134231	112552	1.19261	0.779143
447	A0A140T8P9	Protein Igkv14-111 (Fragment)	Igkv14-111	118	12362.3	29457.5	42123.8	138791	188077	138456	27981.2	155108	0.180398	0.00628996
448	Q9Z0G9	Claudin-3	Cldn3	219	97707.7	108017	91205.1	42237.9	35032.9	44991.4	98976.5	40754.1	2.42863	0.00133485
449	Q9D2G2	Dihydrolipoyllysine-residue succinyltransferase component of 2-oxoglutarate dehydrogenase complex, mitochondrial	Dlst	454	3568.21	16308.2	15960.4	23350.4	2364.64	837.955	11945.6	8850.99	1.34964	0.735167
450	Q62082	Myosin regulatory light chain 10	Myl10	202	402825	282828	284200	26387.5	34206.5	33146.2	323285	31246.7	10.3462	0.0177423
451	Q07456	Protein AMBP	Ambp	349	26740.5	29171.7	31296.9	77989	71524.8	77892	29069.7	75801.9	0.383495	0.000177387
452	Q61084	Mitogen-activated protein kinase kinase kinase 3	Map3k3	626	21458.7	568.347	35088.4	4502.87	3980.97	6575.67	19038.5	5019.83	3.79265	0.297051
453	Q4VWZ5	Acyl-CoA-binding protein	Dbi	135	12347.7	31717.8	7827.51	14092	4816.54	234.43	17297.7	6380.99	2.71082	0.280462
454	A0A0G2JE99	Protein Iglc1 (Fragment)	Iglc1	106	51058.6	32206.5	43555.5	17423.5	11929.8	20527.2	42273.5	16626.8	2.54249	0.0271843
455	A0A075B5T3	Protein Ighv6-6 (Fragment)	Ighv6-6	119	5035.84	2741.53	15203	20758.1	23092.4	22210.4	7660.13	22020.3	0.347867	0.0602162
456	Q8CEK3	Serine protease inhibitor kazal-like protein, minor form	Spinkl	90	643151	622209	952011	11748.8	20438.9	9468.64	739124	13885.4	53.2301	0.0208482
457	Q99J77	N-acetylneuraminic acid synthase (Sialic acid synthase)	Nans	359	25645.9	54429.1	35784.8	679.691	10998.8	3869.73	38619.9	5182.72	7.45166	0.0451046
458	Q78IQ7	Zinc transporter ZIP4	Slc39a4	660	33939.2	33673.4	46121.5	14029.6	16854.4	15172.8	37911.4	15352.3	2.46943	0.0276617
459	O35566	CD151 antigen	Cd151	253	35509.1	39685.7	54332.5	21994.4	24409.9	25185.8	43175.8	23863.3	1.80929	0.0734969
460	Q9CZB0	Succinate dehydrogenase cytochrome b560 subunit, mitochondrial	Sdhc	169	99864.6	124506	174985	27702.8	17808.8	17928.2	133119	21146.6	6.29504	0.0344247
461	Q8BFY6	Peflin	Pef1	275	10676.5	10045.4	1057.07	5920.05	526.078	373.831	7259.67	2273.32	3.19342	0.254165
462	P48771	Cytochrome c oxidase subunit 7A2, mitochondrial	Cox7a2	83	176962	191152	309983	36005.7	39849.1	56023.4	226033	43959.4	5.14185	0.0470689
463	O35176	ABPA2	Scgb1b2	93	122239	71438.6	63770.6	8901.36	9832.61	14017	85816.2	10917	7.8608	0.0541084
464	Q9D7U0	Prostate stem cell antigen	Psca	123	1.48279e+06	1.13714e+06	1.23161e+06	465916	451711	637775	1.28385e+06	518467	2.47624	0.00623311
465	Q9CQV8	14-3-3 protein beta/alpha	Ywhab	246	9888.55	35488.1	21397	5942.12	3280.93	3027.61	22257.9	4083.55	5.45062	0.131339
466	Q5SXR6	Clathrin heavy chain	Cltc	1679	48496.1	112727	108110	1475.69	2228.61	1768.5	89777.9	1824.27	49.2131	0.051087
467	Q921G7	Electron transfer flavoprotein-ubiquinone oxidoreductase, mitochondrial	Etfdh	616	88621.8	76540.3	116293	4364.11	4777.43	9934.89	93818.5	6358.81	14.7541	0.0158898
468	Q149Z9	Histone H1.3	Hist1h1d	221	35092.4	191248	140536	4246.73	1372.38	2557.38	122292	2725.49	44.8697	0.121515
469	P51432	1-phosphatidylinositol 4,5-bisphosphate phosphodiesterase beta-3	Plcb3	1234	76904.2	59445.9	106087	10119.2	10615.5	2329.42	80812.3	7688.03	10.5114	0.029027
470	Q5SYD0	Unconventional myosin-Id	Myo1d	1006	22757.2	36140.1	51696.2	16593.9	13651.5	16018.2	36864.5	15421.2	2.39051	0.122717
471	Q0VBB8	Ileal sodium/bile acid cotransporter	Slc10a2	348	241998	236516	306412	254236	229897	244266	261642	242800	1.0776	0.494997
472	P07743	BPI fold-containing family A member 2	Bpifa2	235	118209	81022	69746.4	41320	30710.5	28524.3	89659.2	33518.3	2.67494	0.0533305
473	A0A0A0MQA3	Alpha-1-antitrypsin 1-1	Serpina1a	436	219851	209984	141911	5436.71	7843.46	7608.93	190582	6963.03	27.3705	0.0172662
474	Q3TS44	Proteasome subunit alpha type	Psma1	263	179983	209934	311507	13348.8	13746.6	6969.08	233808	11354.8	20.591	0.030227
475	A2AFW6	Mitochondrial carrier homolog 2	Mtch2	294	40428.2	43786.4	64377.5	1124.51	842.926	2087.45	49530.7	1351.63	36.6452	0.0230692
476	F8VQ45	Transmembrane channel-like protein	Tmc4	694	4264.02	1000.29	2295.56	1923.03	3191	7111.02	2519.96	4075.02	0.618392	0.452049
477	Q8BT60	Copine-3	Cpne3	533	134226	111212	136968	55212.9	25515.5	37692.1	127469	39473.5	3.22922	0.00178903
478	Q9DBJ3	Brain-specific angiogenesis inhibitor 1-associated protein 2-like protein 1	Baiap2l1	514	83611.9	76250.8	34949.5	16571.1	30618.1	24520.8	64937.4	23903.4	2.71667	0.104847
479	Q06185	ATP synthase subunit e, mitochondrial	Atp5i	71	67985.2	70393.5	51669.4	3766.72	2409.91	7839.93	63349.4	4672.19	13.5588	0.00656095
480	Q8JZU2	Tricarboxylate transport protein, mitochondrial	Slc25a1	311	40346.2	47114.5	66531.4	7364.86	45376.4	8363.44	51330.7	20368.2	2.52014	0.117082
481	P23953	Carboxylesterase 1C	Ces1c	554	33242.8	41406.6	41608.3	3239.68	17236.3	3028.19	38752.6	7834.72	4.94627	0.00886148
482	E9Q5J9	Tropomyosin alpha-3 chain	Tpm3	285	153164	142371	138318	13112.8	25227.8	3500.98	144618	13947.2	10.369	0.000145695
483	Q792Z1	MCG140784	Try10	246	67870.4	1696.19	939.109	20121.9	838.705	27847.1	23501.9	16269.2	1.44456	0.782765
484	Q6ZWQ9	MCG5400	Myl12a	172	17561	32947.7	33261.5	10122.3	18014.1	8128.33	27923.4	12088.3	2.30996	0.0721461
485	B1AR69	Protein Myh13	Myh13	1938	113681	71487.4	63197.7	5979.09	8328.92	7582.86	82788.6	7296.96	11.3456	0.0400577
486	Q14AA6	GTP-binding nuclear protein Ran	1700009N14Rik	216	15690.9	24233.7	22191.6	6115.34	1414.7	1155.84	20705.4	2895.29	7.15141	0.00717416
487	A0A0U1RNJ1	Fatty acid synthase	Fasn	2502	10564.9	30874.6	20115	2468.55	1657.84	1133.6	20518.2	1753.33	11.7024	0.0847632
488	P24527	Leukotriene A-4 hydrolase	Lta4h	611	32853.8	61944.8	74612.4	8408.59	3778.11	3767.44	56470.3	5318.05	10.6186	0.0517217
489	Q61171	Peroxiredoxin-2	Prdx2	198	41184.4	79711.9	73876.2	9035.64	15669.9	9225.74	64924.2	11310.4	5.7402	0.0426552
490	Q9JHI4	Solute carrier family 13 member 1	Slc13a1	594	18399.2	26151.9	41886.4	27189.7	39506.9	32626.5	28812.5	33107.7	0.870267	0.619193
491	Q542H2	Proteasome subunit alpha type	Psma7	248	179532	223257	222758	39869.8	52626.6	49492.4	208516	47329.6	4.40561	0.00532257
492	Q3TC45	Protein S100-A10	S100a10	97	21832.3	23769.7	32861.6	4298.94	4713.29	134.047	26154.5	3048.76	8.57875	0.0110566
493	Q99KN1	Arrestin domain-containing protein 1	Arrdc1	434	26935.1	15321.1	12178.3	10951.6	22466.9	16548.7	18144.9	16655.8	1.0894	0.804002
494	Q3UE92	X-prolyl aminopeptidase (Aminopeptidase P) 1, soluble, isoform CRA_b	Xpnpep1	666	61563.1	82443.1	97799.4	2585.25	26583.4	1687.17	80601.9	10285.3	7.83663	0.00723042
495	Q9D8B4	NADH dehydrogenase [ubiquinone] 1 alpha subcomplex subunit 11	Ndufa11	141	47842	29788.4	85084.8	8312.47	2115.3	7532.35	54238.4	5986.71	9.0598	0.0954372
496	Q3UCD9	Cathepsin D	Ctsd	410	99497.9	130502	163864	8729.87	15628.8	7560.5	131288	10639.7	12.3394	0.0213023
497	P54071	Isocitrate dehydrogenase [NADP], mitochondrial	Idh2	452	30925.1	25011.8	58839	17523.1	6921.74	1415.59	38258.6	8620.14	4.43828	0.0874858
498	E9Q3X0	Major vault protein	Mvp	870	17636.6	56045.5	38676.3	1086.98	2323.74	4127.08	37452.8	2512.6	14.906	0.0869774
499	O09117	Synaptophysin-like protein 1	Sypl1	261	42840.6	38617	44871.5	44351.6	49977.9	50219.6	42109.7	48183.1	0.873952	0.0844805
500	Q09098	Prostate and testis expressed protein 4	Pate4	99	63089.1	57869.1	98222.8	946.199	1322.28	1140.89	73060.3	1136.46	64.2877	0.0296557
501	Q9QXX3	Group 10 secretory phospholipase A2	Pla2g10	151	36325.7	30024.4	29041.6	4965.83	16035.3	13921.5	31797.2	11640.9	2.73151	0.0110148
502	Q549D0	Tetraspanin	Cd63	238	17513.8	21824.1	6387.27	54997.5	53891.1	56022.5	15241.7	54970.4	0.277271	0.0120007
503	Q9D1Q5	MCG21235	Serpinb3b	387	72913.9	49188.2	31729.4	23789.1	5369.68	17691.7	51277.2	15616.8	3.28346	0.0784972
504	H3BKH6	S-formylglutathione hydrolase	Esd	295	39160.5	97416	119226	7968.98	11647.5	5868.18	85267.4	8494.89	10.0375	0.0840324
505	Q91XE4	N-acyl-aromatic-L-amino acid amidohydrolase (carboxylate-forming)	Acy3	318	88218.1	81664.1	89546.5	6839.52	3392.53	2759.38	86476.2	4330.48	19.9692	8.02707e-05
506	Q3U367	4-trimethylaminobutyraldehyde dehydrogenase	Aldh9a1	518	77631.5	92722.8	149932	15566.7	184025	8379.33	106762	69323.8	1.54005	0.591925
507	Q64435	UDP-glucuronosyltransferase 1-6	Ugt1a6	531	110313	64384.5	9032.66	1728.84	2887.99	1702.53	61243.4	2106.45	29.0742	0.18082
508	K7Q7T7	RAS-related C3 botulinum substrate 1	Rac1	192	61609.7	73432.4	103774	17626.5	32525	28820.5	79605.5	26324	3.02407	0.0390697
509	A0A140T8M6	Protein Igkv3-5 (Fragment)	Igkv3-5	120	10833.5	3920.24	8341.67	29910.4	38799.9	31112.8	7698.47	33274.3	0.231363	0.00248952
510	Q5I0W0	ATP synthase F(0) complex subunit B1, mitochondrial	Atp5f1	256	47511.8	68253.6	70315.3	3400.54	6625.32	9932.26	62026.9	6652.71	9.32356	0.0125788
511	P28063	Proteasome subunit beta type-8	Psmb8	276	76863.4	99838.2	157397	4020.78	7132.93	3591.18	111366	4914.96	22.6586	0.0468026
512	Q9R1P3	Proteasome subunit beta type-2	Psmb2	201	72832.1	89278.5	106637	760.66	1118.37	6908.6	89582.5	2929.21	30.5825	0.0100858
513	P01639	Ig kappa chain V-V region MOPC 41	Gm5571	130	12714.8	17437	7310.33	50947.6	4894.14	28716	12487.4	28185.9	0.443035	0.359045
514	Q3TJY2	WD repeat domain 1	Wdr1	606	82547	127124	94148.1	27144.2	46432.5	23794.1	101273	32456.9	3.12023	0.0193054
515	A0A075B5K3	Protein Igkv17-121	Igkv17-121	117	176148	120688	131253	78077.1	173645	70726.5	142696	107483	1.32762	0.414624
516	Q9EQ06	Estradiol 17-beta-dehydrogenase 11	Hsd17b11	298	4051.04	8917.32	14013.7	579.13	488.164	1084.8	8994.03	717.365	12.5376	0.101919
517	Q3UV17	Keratin, type II cytoskeletal 2 oral	Krt76	594	7201.82	20587.2	15079.2	72302.6	77463.7	113135	14289.4	87633.6	0.163059	0.02177
518	P42125	Enoyl-CoA delta isomerase 1, mitochondrial	Eci1	289	38979.3	62763.3	78616.9	4915.9	3044.13	4753.97	60119.8	4238	14.1859	0.0396329
519	Q62470	Integrin alpha-3	Itga3	1053	46069	37447	51083.6	21401.3	1168.07	18072.5	44866.6	13547.3	3.31184	0.0190284
520	E9PWZ2	ABPA20	Scgb1b20	93	73941.7	25947.1	38041.1	3497.89	5891.97	3742.8	45976.6	4377.55	10.5028	0.101583
521	Q8VDD5	Myosin-9	Myh9	1960	117611	114339	125124	29701.9	30110.6	5730.72	119024	21847.8	5.4479	0.00279393
522	Q9QWL7	Keratin, type I cytoskeletal 17	Krt17	433	28992.2	40057.1	12149.1	11244	13036.3	39253.1	27066.1	21177.8	1.27804	0.653728
523	G3XA48	Isopentenyl-diphosphate Delta-isomerase 1	Idi1	283	37356.8	39119.3	36058.7	7577.81	6300.6	6464.48	37511.6	6780.96	5.5319	0.000121079
524	P21614	Vitamin D-binding protein	Gc	476	14537.5	33794.9	33801.4	9709.68	1529.92	1636.86	27377.9	4292.15	6.3786	0.0530451
525	G3X9L6	MCG55033	Gm10250	160	52500.1	78815.2	74186	4605.5	10872.8	7101.06	68500.4	7526.46	9.10128	0.013813
526	P62835	Ras-related protein Rap-1A	Rap1a	184	70487.2	27800	74612.5	22901.3	28109.2	27841.4	57633.3	26284	2.19272	0.169637
527	E9PX96	Protein Sva	Sva	165	75249.1	54250.5	96094.9	742.517	2283.28	234.42	75198.1	1086.74	69.1962	0.0252984
528	A2AEP0	Odorant-binding protein 1b	Obp1b	171	53602	24651.4	32462.4	7495.24	1583.26	12269.7	36905.3	7116.06	5.18619	0.0615151
529	A0A0R4J138	Arylsulfatase B	Arsb	534	25877.4	33379.8	30025.4	2090.52	7019.2	21461.4	29760.9	10190.4	2.92049	0.0637574
530	Q5FWJ3	Vimentin	Vim	466	1623.07	18713.4	7912.92	12675	1162.53	543.595	9416.46	4793.7	1.96434	0.509663
531	O08601	Microsomal triglyceride transfer protein large subunit	Mttp	894	15960	21622.5	40343.8	24899.2	10867.3	19785.5	25975.5	18517.3	1.40276	0.439078
532	Q64727	Vinculin	Vcl	1066	38990.4	52652.4	34299.3	6206.21	9626.66	2719.14	41980.7	6184	6.78859	0.0143679
533	A0A075B5Q0	Protein Ighv5-6 (Fragment)	Ighv5-6	117	30787.3	40087.2	40671.7	18288.1	4652.59	20553.7	37182.1	14498.1	2.56461	0.024672
534	P36552	Oxygen-dependent coproporphyrinogen-III oxidase, mitochondrial	Cpox	443	28427.7	31039.4	27963.5	1098.23	5344.38	1557.8	29143.5	2666.8	10.9283	0.000173316
535	Q5SW83	ARP2 actin-related protein 2 homolog (Yeast)	Actr2	394	25145.8	35527.6	41302.9	5296.36	10215	4676.57	33992.1	6729.32	5.05134	0.0188064
536	Q9CZU6	Citrate synthase, mitochondrial	Cs	464	5941.45	19836.5	29226.6	13625.9	10938.1	13657.8	18334.9	12740.6	1.43909	0.495893
537	P56389	Cytidine deaminase	Cda	146	57793.7	86005.4	111213	5809.74	8614.33	11887.8	85004.1	8770.6	9.69193	0.0371149
538	Q6PZE0	Mucin-19	Muc19	7524	13738.8	19453.7	8799.19	53326	58322.3	54615.9	13997.2	55421.4	0.25256	0.00143566
539	Q543B9	Prolyl endopeptidase	Prep	710	49352.7	122166	134074	5816.63	2981.35	12636.6	101864	7144.87	14.257	0.0684138
540	Q08509	Epidermal growth factor receptor kinase substrate 8	Eps8	821	23813	19400.1	31338.9	17718.3	11424.9	25651.9	24850.7	18265	1.36056	0.290801
541	Q544N9	Monocarboxylate transporter 1	Slc16a1	493	16930.1	22905.8	24166.2	502.265	611.286	859.544	21334.1	657.698	32.4375	0.0113143
542	Q5F1Z8	GM2 ganglioside activator protein	Gm2a	193	57424.1	42733.6	3041.28	12219	8136.74	1635.09	34399.6	7330.28	4.69281	0.234872
543	Q8C1P2	Alpha-defensin 21	Defa21	93	363521	424421	455274	40988.6	48690.8	33969.7	414405	41216.4	10.0544	0.00436757
544	Q9ET30	Transmembrane 9 superfamily member 3	Tm9sf3	587	1215.71	9644.95	12645.1	5782.56	6677.14	6885.94	7835.26	6448.55	1.21504	0.725056
545	Q9CXN7	Phenazine biosynthesis-like domain-containing protein 2	Pbld2	288	55747.8	71633.9	82147.6	3937.9	6484.71	494.638	69843.1	3639.08	19.1925	0.0102471
546	A0A0B4J1I3	Protein Igkv4-74 (Fragment)	Igkv4-74	119	19167.8	5487.61	6098.75	10609.4	26102.3	8736.05	10251.4	15149.2	0.676694	0.528909
547	A0A0G2JFE9	Protein Ighv1-76 (Fragment)	Ighv1-76	117	2435.98	14899.7	4897.47	4769.99	10405.1	3002.7	7411.04	6059.27	1.22309	0.778248
548	Q3TX25	Aldehyde dehydrogenase	Aldh3b1	468	2772.84	4229.77	17164.6	3433.51	10478.8	1148.64	8055.73	5020.33	1.60462	0.607673
549	Q3V235	Prohibitin 2	Phb2	299	8013.39	10228.8	13831.9	7592.89	1544.99	703.244	10691.4	3280.37	3.2592	0.0579933
550	Q3ULF7	Actin-related protein 3	Actr3	418	5603.72	7777.88	8430.81	1302.56	1476.71	1204.12	7270.8	1327.8	5.47583	0.0193263
551	Q9DAX2	Phospholipid phosphatase 2	Plpp2	276	39706.8	11179.8	97157.9	16478.7	13977.5	15383.9	49348.2	15280	3.22959	0.310155
552	Q9R1P0	Proteasome subunit alpha type-4	Psma4	261	129594	148502	203108	9471.84	13094.7	14793.9	160401	12453.5	12.88	0.0210315
553	A2AQ99	Protein Duox2	Duox2	1517	19634.1	11426.7	15166.6	695.795	1258.79	6528.91	15409.1	2827.83	5.44909	0.0156892
554	Q8C1N9	Alpha-defensin 2	Gm21002	95	45123.1	49281.6	78428.6	17249	25892.9	12194.7	57611.1	18445.6	3.12331	0.050417
555	D3Z3Y2	MCG12140, isoform CRA_a	Smim24	72	10391.6	13438.9	23161.8	21431.7	37344.5	25009	15664.1	27928.4	0.560866	0.121161
556	Q3TQ70	Beta1 subnuit of GTP-binding protein	Gnb1	340	95494.9	86872.3	123395	10156	13404.2	11974.5	101921	11844.9	8.60463	0.014134
557	Q4FJQ0	MCG130610	Rab7	207	56111.3	61866.3	70176	18156.3	19011.2	20565.8	62717.8	19244.4	3.25901	0.00732085
558	Q3UEK1	Mannose binding lectin (C), isoform CRA_b	Mbl2	244	40108.3	26126.9	28860	4850.15	3384.93	7123.57	31698.4	5119.55	6.19163	0.0197125
559	Q9JMH6	Thioredoxin reductase 1, cytoplasmic	Txnrd1	613	14775.9	35743.5	35734.1	7124.83	13000.9	10639.3	28751.2	10255	2.80362	0.110656
560	P97300	Neuroplastin	Nptn	397	12116.7	10195.3	12590.8	6712.78	6015.69	6247.72	11634.3	6325.4	1.8393	0.0133766
561	Q5ND36	Alpha-2-antiplasmin	Serpinf2	491	40939.7	7714.05	13666.1	21271.5	5783.08	7491.73	20773.3	11515.4	1.80395	0.47658
562	P08752	Guanine nucleotide-binding protein G(i) subunit alpha-2	Gnai2	355	87425.4	109973	136428	13977.4	15937	13981.8	111275	14632.1	7.6049	0.0206169
563	Q4FK49	Inorganic pyrophosphatase	Ppa1	289	27557	54121.8	53247.8	697.019	2922.49	2158.31	44975.6	1925.94	23.3525	0.0379472
564	P62748	Hippocalcin-like protein 1	Hpcal1	193	10683.6	13542.1	1737.53	1250.74	3494.27	1474.58	8654.41	2073.2	4.17442	0.201728
565	Q8VDB9	Sodium- and chloride-dependent transporter XTRP3A	Slc6a20a	592	7691.09	2155.05	4918.03	4173.18	6395.26	3631.51	4921.39	4733.32	1.03973	0.92364
566	Q9DCC4	Pyrroline-5-carboxylate reductase 3	Pycrl	274	24166.2	28103.2	39883.1	5997.05	2336.54	5506.92	30717.5	4613.5	6.65817	0.0257405
567	P99028	Cytochrome b-c1 complex subunit 6, mitochondrial	Uqcrh	89	192162	212109	264519	14094.3	10584.8	13934.5	222930	12871.2	17.3201	0.0102259
568	Q9D0M3	Cytochrome c1, heme protein, mitochondrial	Cyc1	325	142092	162349	220823	1455.62	969.04	4873.68	175088	2432.78	71.9705	0.0179617
569	A0A0R4J077	Pentaxin	Mptx1	219	5315.69	12829.5	5611.44	22925	82862.2	31262.2	7918.86	45683.1	0.173343	0.179584
570	Q9JLI0	Aldo-keto reductase a	Akr1c12	323	70189.7	138543	124583	32687.3	6953.09	26112	111105	21917.5	5.06925	0.037735
571	A0A0B4J1I0	Protein Igkv1-110 (Fragment)	Igkv1-110	120	15011.5	13605.4	26774.9	67085.6	35781.3	16498.2	18463.9	39788.4	0.464054	0.282412
572	B2RXS4	Plexin-B2	Plxnb2	1842	19592	22531.6	19253	3922.35	716.763	1153.07	20458.9	1930.73	10.5965	0.000215565
573	E9PYR1	Protein Fbxl18	Fbxl18	771	6301.99	64139.2	64326.6	232.586	2952.2	1145.76	44922.6	1443.52	31.1203	0.152954
574	Q3UBY5	Cathepsin C, isoform CRA_b	Ctsc	462	145668	159700	167605	7861.63	6632.49	11629.3	157658	8707.79	18.1054	0.00114457
575	Q8K157	Aldose 1-epimerase	Galm	342	350.485	5112	457.492	2192.34	1446.13	1190.85	1973.32	1609.77	1.22584	0.839897
576	P47856	Glutamine--fructose-6-phosphate aminotransferase [isomerizing] 1	Gfpt1	697	21192	31489.6	26399.9	3251.34	3535	390.703	26360.5	2392.35	11.0187	0.00912295
577	Q499X7	Coronin	Coro1c	474	2877.89	5088.55	5941.59	3574.39	5110.45	4352.76	4636.01	4345.87	1.06676	0.794204
578	P09036	Serine protease inhibitor Kazal-type 1	Spink1	80	35653.6	20992.8	23102.5	20664.3	13548.7	9707.77	26582.9	14640.3	1.81574	0.107425
579	Q8C165	Probable carboxypeptidase PM20D1	Pm20d1	503	25651	19265.3	27614	10528.4	11555.7	18205.2	24176.8	13429.7	1.80024	0.0368818
580	Q3TEE8	Thioredoxin domain-containing protein 5	Txndc5	417	3337.17	10370.1	1905.98	1097.74	3720.69	6391.62	5204.42	3736.69	1.39279	0.659069
581	Q8VCW8	Acyl-CoA synthetase family member 2, mitochondrial	Acsf2	615	9388.66	56962.4	46592.1	4477.14	9357.14	7672.18	37647.7	7168.82	5.25159	0.168094
582	P19536	Cytochrome c oxidase subunit 5B, mitochondrial	Cox5b	128	276424	303218	343167	38177.9	37997.7	32297.4	307603	36157.7	8.50727	0.0047278
583	B1AQ75	Keratin, type I cuticular Ha6	Krt36	473	5459.62	3122.35	5122.46	2921.48	209.742	2312.44	4568.14	1814.55	2.5175	0.0671677
584	P08730	Keratin, type I cytoskeletal 13	Krt13	437	8279.17	6043.53	6057.4	2250.45	1992.19	3142.49	6793.36	2461.71	2.75961	0.015208
585	Q9ES97	Reticulon-3	Rtn3	964	16302.3	4693.99	30569.7	53098.8	76364.9	77566.9	17188.7	69010.2	0.249074	0.00910704
586	Q3UVK0	Endoplasmic reticulum metallopeptidase 1	Ermp1	898	37693.8	5143.08	9938.1	9114.66	9538.98	11381.5	17591.7	10011.7	1.75711	0.533126
587	P97792	Coxsackievirus and adenovirus receptor homolog	Cxadr	365	236046	203649	241669	17538.5	24206.1	40473.8	227121	27406.1	8.28725	0.000495181
588	E9Q0N2	Protein Ptprh	Ptprh	971	10383.8	7466.36	10640.3	3620.63	327.471	4275.23	9496.82	2741.11	3.46459	0.0141005
589	O35684	Neuroserpin	Serpini1	410	22056.8	20531.5	681.792	6484.51	6942.48	6468.43	14423.4	6631.81	2.17488	0.375193
590	Q9D2Z1	Protein Ceacam20	Ceacam20	577	41127.3	38855.6	46704.3	8717.74	8096.64	12743.9	42229.1	9852.75	4.28602	0.000761803
591	Q9D871	Carcinoembryonic antigen-related cell adhesion molecule 18	Ceacam18	376	14959.3	20125.6	14501.4	3753.79	4084.81	3946.37	16528.8	3928.32	4.20759	0.0196305
592	Q9D8W7	OCIA domain-containing protein 2	Ociad2	154	32719.4	55163.5	68670.5	2340.11	5838.23	5293.71	52184.5	4490.68	11.6206	0.0437608
593	P04104	Keratin, type II cytoskeletal 1	Krt1	637	93075.9	93734.7	92715.7	99826.8	115630	108579	93175.5	108012	0.862639	0.0826156
594	Q9JKF1	Ras GTPase-activating-like protein IQGAP1	Iqgap1	1657	14051.8	725.582	3243.48	475.962	719.816	1381.81	6006.95	859.196	6.99136	0.334834
595	P70677	Caspase-3	Casp3	277	71156.6	75652.2	88144.3	15515.9	9065.95	6409.43	78317.7	10330.4	7.58127	0.00120926
596	A2ACG7	Dolichyl-diphosphooligosaccharide--protein glycosyltransferase subunit 2	Rpn2	615	15805	20692.7	26916	2902.35	2407.74	1053.6	21137.9	2121.23	9.96491	0.0246465
597	Q8R1E9	ABPBG27	Scgb2b27	112	61276.1	40913.2	38002.8	8789.91	8032.26	8765.07	46730.7	8529.08	5.47898	0.0346891
598	P01820	Ig heavy chain V region PJ14	1		7533.79	3554.87	1909.43	11017.4	7192.85	22186.6	4332.7	13465.6	0.321761	0.169495
599	E9Q0F0	Protein Krt78	Krt78	1068	67132.5	76474.2	46359.2	69194.9	67471.8	84195.4	63322	73620.7	0.860111	0.388204
600	Q9ERV7	p53-induced death domain-containing protein 1	Pidd1	915	10898.4	950.345	6704.99	20528	12648.9	1813.92	6184.6	11663.6	0.530247	0.437267
601	Q3U573	Dolichyl-diphosphooligosaccharide--protein glycosyltransferase subunit STT3A	Stt3a	705	17994.9	10978	20313.4	16723	14859.1	18317.1	16428.8	16633.1	0.987716	0.950425
602	A2AEY2	Four and a half LIM domains 1, isoform CRA_c	Fhl1	323	6543.15	18187.5	8166.88	13150.5	38327.1	3002.43	10965.8	18160	0.603845	0.572389
603	Q8BYF6	Sodium-coupled monocarboxylate transporter 1	Slc5a8	611	12235.9	26584.3	43856.5	14565.9	20629.4	14378.2	27558.9	16524.5	1.66776	0.350497
604	Q3UEK9	Alpha-2-HS-glycoprotein	Ahsg	345	9740.45	22919.6	1435.96	647.972	924.771	434.742	11365.3	669.162	16.9845	0.229332
605	Q8CCH2	NHL repeat-containing protein 3	Nhlrc3	347	5927.45	29642.7	25099.1	17128.3	10004.4	2034.75	20223.1	9722.47	2.08004	0.29671
606	Q63886	UDP-glucuronosyltransferase 1-1	Ugt1a1	535	24080.4	27351.5	39412.3	8932.2	7260.28	8762.32	30281.4	8318.26	3.64035	0.0406755
607	Q6IFX2	Keratin, type I cytoskeletal 42	Krt42	452	21814.1	17455.9	24594.1	3347.55	7349.26	20562.8	21288	10419.9	2.04302	0.160744
608	Q8VED5	Keratin, type II cytoskeletal 79	Krt79	531	104736	123838	119846	130146	114130	182399	116140	142225	0.816595	0.332696
609	P19639	Glutathione S-transferase Mu 3	Gstm3	218	46153.4	68065.5	61986.2	7717.73	12212	4563.49	58735.1	8164.42	7.19402	0.00999018
610	A0A075B5Q4	Protein Ighv5-12 (Fragment)	Ighv5-12	117	37705.7	25468.2	18415.4	46718.1	13543.2	10492.4	27196.5	23584.6	1.15315	0.798246
611	Q91ZP4	MCG3105, isoform CRA_a	Slc5a4b	660	19246.8	21309.4	17317.9	31664.2	39766.7	34148.3	19291.4	35193	0.548158	0.0105234
612	Q61735	Leukocyte surface antigen CD47	Cd47	303	1986.08	11462.8	14025.5	2317.56	3137.82	3440.26	9158.11	2965.21	3.08851	0.232111
613	Q9EQ08	Heparan N-sulfatase	Sgsh	502	6997.38	5955.56	4661.27	1870.06	2635.92	3001.04	5871.4	2502.34	2.34637	0.0220827
614	P97450	ATP synthase-coupling factor 6, mitochondrial	Atp5j	108	42679.6	56077.4	73120.3	10317.6	8735.97	1209.19	57292.4	6754.26	8.48241	0.0209464
615	Q99J57	S-adenosylmethionine synthase	Mat2a	395	31285.9	65122.7	70026.6	3017.38	2285.61	1166.36	55478.4	2156.45	25.7267	0.0481582
616	Q9CZ30	Obg-like ATPase 1	Ola1	396	44324.4	35635.4	38643	1367.87	2651.82	1647.03	39534.3	1888.91	20.9297	0.00385181
617	Q8R3P0	Aspartoacylase	Aspa	312	21841.8	19310.4	16196	1643.28	468.566	5700.55	19116.1	2604.13	7.34067	0.00192139
618	Q7TMR0	Lysosomal Pro-X carboxypeptidase	Prcp	491	30993.5	26690.2	27160.1	5327.07	486.345	2027.16	28281.3	2613.53	10.8211	0.000204446
619	A0A140T8K8	60S ribosomal protein L13	Rpl13-ps3	207	6764.91	6396.27	6289.69	1119.05	805.952	1183.44	6483.62	1036.15	6.25744	1.16861e-05
620	A3KMP2	Tetratricopeptide repeat protein 38	Ttc38	465	1927.64	23196.6	31599.3	4996.36	5563.49	2263.94	18907.9	4274.6	4.42331	0.238236
621	Q3V100	Mannose-6-phosphate isomerase	Mpi	423	8627.73	14739.4	15184.8	4955.59	229.999	319.566	12850.6	1835.05	7.00288	0.0164201
622	O89051	Integral membrane protein 2B	Itm2b	266	7845.31	22346	9947.6	5591.64	5558.29	6436.85	13379.6	5862.26	2.28233	0.238127
623	Q63810	Calcineurin subunit B type 1	Ppp3r1	170	15552.4	2865.76	18679.3	1877.64	8807.07	431.464	12365.8	3705.39	3.33725	0.210645
624	Q3UN54	Secreted seminal-vesicle Ly-6 protein 1	Sslp1	99	391.673	1568.47	1840.08	507.983	964.616	2493.16	1266.74	1321.92	0.958258	0.944943
625	Q2KHK7	Mal, T-cell differentiation protein 2	Mal2	175	131734	123952	149216	122486	105588	138851	134967	122308	1.1035	0.360137
626	A0A075B5K6	Protein Igkv2-109 (Fragment)	Igkv2-109	121	3291.48	10780	26439.6	301.537	18677.3	7340.84	13503.7	8773.22	1.53919	0.615853
627	B8JJA9	Cytochrome c oxidase subunit 7C, mitochondrial	Cox7c	49	219795	325388	640117	110272	113054	144917	395100	122748	3.2188	0.162704
628	Q5NCJ9	Cytochrome b-c1 complex subunit 9	Uqcr10	64	68200.5	79054.8	90531.4	715.124	3198.06	1075.82	79262.2	1663	47.6622	0.00623526
629	A0A0A6YWR2	Ig gamma-1 chain C region secreted form (Fragment)	Ighg1	393	39522.3	51889.2	65324.3	2922.69	8676.63	4948.21	52245.3	5515.84	9.47186	0.0202369
630	Q8C196	Carbamoyl-phosphate synthase [ammonia], mitochondrial	Cps1	1500	6240.42	12213.1	2754.4	1187.63	625.442	390.69	7069.32	734.588	9.62351	0.147819
631	A0A0R4J093	UMP-CMP kinase	Cmpk1	227	33207.6	83391.6	64865.8	1484.62	25838.8	762.289	60488.3	9361.89	6.46113	0.0523701
632	Q9D3P8	Plasminogen receptor (KT)	Plgrkt	147	34865.1	39703.7	50670.6	2241.47	4961.53	6055.57	41746.5	4419.52	9.44592	0.0117095
633	Q49B93	Sodium-coupled monocarboxylate transporter 2	Slc5a12	619	7989.21	20483	8223.16	11114.5	2006.49	10323.8	12231.8	7814.94	1.56518	0.436351
634	P10518	Delta-aminolevulinic acid dehydratase	Alad	330	88729.5	128240	157185	3144.87	8737.56	2157.82	124718	4680.08	26.6487	0.0252155
635	Q61316	Heat shock 70 kDa protein 4	Hspa4	841	3333.95	8369.48	7140.25	3480.34	3233.28	2789.95	6281.22	3167.86	1.9828	0.174303
636	P31650	Sodium- and chloride-dependent GABA transporter 3	Slc6a11	627	14096.3	709.511	2038.82	1064.87	6648.64	9947.71	5614.88	5887.07	0.953765	0.959594
637	A0A0A6YWH6	Protein Ighv9-4 (Fragment)	Ighv9-4	117	1601.31	10896.3	18564.6	14612	13642.2	16878.7	10354.1	15044.3	0.68824	0.440941
638	P40124	Adenylyl cyclase-associated protein 1	Cap1	474	31938.6	39045	54638.4	3321.58	4537.2	5506.12	41874	4454.97	9.39939	0.0296974
639	Q8K0L2	Ectonucleoside triphosphate diphosphohydrolase 8	Entpd8	497	1861.05	6510.52	11447.2	644.404	3977.65	2789.59	6606.24	2470.55	2.674	0.270706
640	P52840	Sulfotransferase 1A1	Sult1a1	291	97671.9	130697	150442	9754.49	38909.6	10715.7	126270	19793.3	6.37946	0.007213
641	O35114	Lysosome membrane protein 2	Scarb2	478	6845.19	14171.3	3637	10168.1	1194.82	7819.07	8217.82	6394	1.28524	0.681026
642	P62315	Small nuclear ribonucleoprotein Sm D1	Snrpd1	119	45750.1	41146.3	50756.9	651.396	1944.69	3186.15	45884.4	1927.41	23.8062	0.0024081
643	Q3U6L3	Glutaredoxin, isoform CRA_a	Glrx	107	104396	142708	169639	26231.6	38754	28953.6	138914	31313.1	4.43631	0.0257646
644	Q91WU0	Carboxylesterase 1F	Ces1f	561	74446.8	80885.1	76802.3	13398	11575.7	5750.84	77378	10241.5	7.55535	3.14495e-05
645	P50431	Serine hydroxymethyltransferase, cytosolic	Shmt1	478	43132.6	61715.8	65548.8	2477.02	2474.85	1227.02	56799.1	2059.63	27.5773	0.0153508
646	Q9R1Z7	6-pyruvoyl tetrahydrobiopterin synthase	Pts	144	93790	139357	96668.1	23929.9	32448	34028.6	109938	30135.5	3.64814	0.02801
647	Q8K385	Ferric-chelate reductase 1	FRRS1	592	101159	82534.3	112622	53794	55020	61075.8	98771.7	56629.9	1.74416	0.033907
648	Q922K9	Tyrosine-protein kinase FRK	Frk	512	6768.37	10523.3	5220.45	321.334	6563	10369.7	7504.04	5751.36	1.30474	0.633898
649	Q14BZ3	Latexin	Lxn	222	54678.1	54063.2	62472.3	6243.26	9328.56	9166.43	57071.2	8246.08	6.92101	0.00112004
650	P29416	Beta-hexosaminidase subunit alpha	Hexa	528	18476.2	17640.2	1748.42	7932.9	7313.75	3253.66	12621.6	6166.77	2.04671	0.357674
651	Q8BW75	Amine oxidase [flavin-containing] B	Maob	520	24447.4	12892.5	1431.58	531.793	8641.25	1093.96	12923.8	3422.33	3.77632	0.287765
652	E9PUA7	Tumor protein D52	Tpd52	194	10562.1	24685.6	23426.8	163.726	1191.07	1130.11	19558.2	828.301	23.6124	0.0527205
653	D3YYY1	ABPBG7	Scgb2b7	112	22698	12718	10804.8	1577.05	1000.23	1640.26	15406.9	1405.85	10.9592	0.062457
654	Q0VEE0	5' nucleotidase, ecto	Nt5e	576	52834.7	53806.9	82522.3	5674.73	9138.12	5125.24	63054.6	6646.03	9.48756	0.0268826
655	Q540D7	Alcohol dehydrogenase [NADP(+)]	Akr1a1	325	9555.51	54760.7	42900.6	7232.93	18982.5	2120.38	35739	9445.25	3.7838	0.182463
656	P01633	Ig kappa chain V19-17	Igk-V19-17	149	89397.1	36946.2	31832.2	15338.6	18135.3	16927.7	52725.1	16800.5	3.1383	0.189842
657	O08677	Kininogen-1	Kng1	661	16941.2	73546.8	60838.6	11511.4	12396.4	5640.6	50442.2	9849.46	5.12132	0.139508
658	Q5DX24	AQP 7	Aqp7	303	1960.1	1309	1845.56	8226.03	7971.42	208.531	1704.89	5468.66	0.311756	0.288539
659	P62305	Small nuclear ribonucleoprotein E	Snrpe	92	56357.9	70279.1	88548.8	1072.57	4088.59	1537.77	71728.6	2232.98	32.1224	0.0167341
660	Q99KK7	Dipeptidyl peptidase 3	Dpp3	738	7467.31	9297.33	24746	5281.75	10418.7	953.74	13836.9	5551.4	2.49251	0.27081
661	J3QP56	Acyl-protein thioesterase 1	Lypla1	224	8207.68	14265.1	26823.8	257.334	5633.76	4146.18	16432.2	3345.76	4.91136	0.130491
662	Q9CQM2	ER lumen protein-retaining receptor 2	Kdelr2	212	4846.26	5717.83	5965.78	17179.3	18571.4	21333.6	5509.96	19028.1	0.289569	0.00516975
663	P59999	Actin-related protein 2/3 complex subunit 4	Arpc4	168	4719.8	9688.15	22147.2	7309.71	7493.32	6330.81	12185	7044.61	1.7297	0.42593
664	Q549X4	RAB27b, member RAS oncogene family, isoform CRA_a	Rab27b	218	5758.52	5984.14	6997.36	5649.3	7862.04	7548.66	6246.67	7020	0.88984	0.397097
665	A8IP69	14-3-3 protein gamma	Ywhag	247	15096.2	26360.4	21879.7	3076.04	4519.42	2923.21	21112.1	3506.22	6.02133	0.0303812
666	P07310	Creatine kinase M-type	Ckm	381	12540.3	18892.2	21024.5	978.518	993.854	1639.47	17485.7	1203.95	14.5236	0.0229539
667	Q76MZ3	Serine/threonine-protein phosphatase 2A 65 kDa regulatory subunit A alpha isoform	Ppp2r1a	589	56783.2	24137.2	10991.9	386.005	2687.07	460.078	30637.4	1177.72	26.0142	0.162492
668	Q91XL1	Leucine-rich HEV glycoprotein	Lrg1	342	38862.2	40871.3	44096.8	192.958	9159.89	7232.55	41276.8	5528.46	7.46623	0.00115343
669	P05784	Keratin, type I cytoskeletal 18	Krt18	423	51207.9	61154.2	80909.4	14221.4	30685.2	8712.67	64423.9	17873.1	3.60452	0.0152717
670	Q4G0D3	Serine (Or cysteine) peptidase inhibitor, clade I, member 2	Serpini2	405	595292	417134	342099	29580.3	39766.2	29253.8	451508	32866.8	13.7375	0.0304678
671	W0UUX7	Angiogenin-4	Ang4	144	25642.8	22352.1	27870.7	1361.69	2903.55	1735.34	25288.5	2000.19	12.643	0.00266815
672	A2BHR0	Protein Obp2b	Obp2b	176	15417.5	9499	10325.7	3137.62	2573.4	2288.25	11747.4	2666.42	4.40567	0.0370307
673	Q5HZK3	Proteasome (Prosome, macropain) 28 subunit, alpha	Psme1	249	19396.1	24036.3	25085.5	2826.67	543.631	432.007	22839.3	1267.44	18.0201	0.00215522
674	Q3UD06	ATP synthase subunit gamma	Atp5c1	298	32291.4	60410.6	18657.4	4654.28	1037.16	2085.36	37119.8	2592.26	14.3195	0.105722
675	P06328	Ig heavy chain V region VH558 B4	1		41713	44168.2	34242.9	44031.6	49592.6	37504.8	40041.4	43709.7	0.916076	0.470374
676	Q3UDY1	Aldose reductase	Akr1b3	316	7165.27	19977.6	14665.9	654.271	3917.94	542.819	13936.3	1705.01	8.17371	0.0708853
677	Q9DB20	ATP synthase subunit O, mitochondrial	Atp5o	213	2195.85	14099	5417.2	3003.79	1940.78	420.143	7237.34	1788.24	4.04719	0.262575
678	Q3TAW7	Beta-galactosidase	Glb1	647	25370.8	25556.6	25721.9	3230.08	646.686	312.56	25549.8	1396.44	18.2963	0.00129715
679	Q9CVB6	Actin-related protein 2/3 complex subunit 2	Arpc2	300	22265	26975.3	21260.8	2020.18	2948.73	3417.18	23500.4	2795.36	8.40691	0.00514893
680	P50543	Protein S100-A11	S100a11	98	17268.7	24230.5	19023.9	1246.53	3299.66	1437.78	20174.4	1994.65	10.1142	0.00815091
681	P11031	Activated RNA polymerase II transcriptional coactivator p15	Sub1	127	95170.7	10536.3	13805.8	850.164	4166.68	6593.1	39837.6	3869.98	10.294	0.323321
682	A2RS22	Coronin	Coro1b	484	115407	126506	130496	12120.4	14872.9	13336.1	124136	13443.1	9.23418	0.00125111
683	A0A075B5R7	Protein Ighv14-2 (Fragment)	Ighv14-2	117	20314.5	34210.3	39918.7	1192.34	16194.5	8186.06	31481.2	8524.3	3.69311	0.0380396
684	Q7TN37	Transient receptor potential cation channel subfamily M member 4	Trpm4	1213	6477.74	11823.6	10145.5	10480.6	8917.12	7174.29	9482.29	8857.34	1.07056	0.755273
685	E9PYH2	Cytosolic acyl coenzyme A thioester hydrolase	Acot7	384	5582.59	18909.2	16443.5	385.046	1912.03	664.724	13645.1	987.266	13.8211	0.0887257
686	Q91WT7	3-alpha-hydroxysteroid dehydrogenase type 1	Akr1c14	323	2356.37	30202.7	31746.9	689.927	5500.36	14743.9	21435.3	6978.05	3.07182	0.267389
687	Q64GA5	Egg and early embryo abundant protein	Pla2g4c	597	12109.9	7706.3	14366.3	1025.1	1500.52	234.381	11394.2	920	12.385	0.0295285
688	Z4YJV4	2-oxoglutarate dehydrogenase, mitochondrial	Ogdh	1019	24309.6	24356.8	4700.53	7061.43	2872.61	5673.02	17789	5202.35	3.41941	0.190851
689	Q9JHU9	Inositol-3-phosphate synthase 1	Isyna1	557	63948.1	55293.2	55752.1	5526.97	1861.69	2142.16	58331.1	3176.94	18.3608	0.000703294
690	P24452	Macrophage-capping protein	Capg	352	6921.87	1391.28	3004.94	514.684	1239.11	168.371	3772.69	640.723	5.88818	0.193139
691	F6WVV1	Aquaporin 8, isoform CRA_b	Aqp8	261	2957.41	4671.27	7360.99	4299.74	2619.51	1758.18	4996.56	2892.47	1.72743	0.245185
692	H3BIZ8	Synaptogyrin 2, isoform CRA_b	Syngr2	177	41005.4	57790.2	47691.4	28611.7	25572.1	33879	48829	29354.3	1.66344	0.0388411
693	Q545G0	Proteasome subunit beta type	Psmb3	205	35303.4	53830.5	64442.5	1223.46	379.239	781.399	51192.1	794.698	64.4171	0.0272934
694	A0A075B5R2	Protein Ighv7-3 (Fragment)	Ighv7-3	120	27287.2	26690.3	36942.9	12487.6	7483.87	15201.4	30306.8	11724.3	2.58496	0.0132467
695	P70168	Importin subunit beta-1	Kpnb1	876	4220.43	6752.41	7511.64	455.211	231.098	234.422	6161.49	306.91	20.0759	0.0271285
696	A2A864	Integrin beta	Itgb4	1802	17171.8	5429.41	21879.8	2650.05	3794.26	1728.81	14827	2724.37	5.44236	0.129788
697	P38647	Stress-70 protein, mitochondrial	Hspa9	679	2576.46	29611.3	29264.6	1658.65	271.812	183.824	20484.1	704.76	29.0653	0.157448
698	Q9EQH2	Endoplasmic reticulum aminopeptidase 1	Erap1	930	11701.3	16536.1	30944.7	805.859	773.579	628.542	19727.4	735.993	26.8037	0.081449
699	Q3U344	ADP-ribosylation factor 3	Arf3	181	47506	76961.8	89216	639.678	6783.89	6136.74	71228	4520.1	15.758	0.0301754
700	P21981	Protein-glutamine gamma-glutamyltransferase 2	Tgm2	686	8446.42	16401.8	17405.6	1078.8	339.442	1001.21	14084.6	806.484	17.4642	0.0418244
701	Q99M73	Keratin, type II cuticular Hb4	Krt84	603	12449.7	10752.1	8559.49	3232.06	263.354	508.272	10587.1	1334.56	7.933	0.00360508
702	Q9JJF9	Signal peptide peptidase-like 2A	Sppl2a	523	66715.7	60513.6	68168.6	36812.2	33930.2	36561.5	65132.6	35768	1.82098	0.00257614
703	Q9QUS9	Protein Reg3d	Reg3d	175	115485	63289.3	48014.7	13812.8	14775.9	11124.2	75596.4	13237.6	5.71072	0.0922074
704	Q545I1	Regenerating islet-derived 3 gamma	Reg3g	174	44002	47059.3	15784.2	276.336	2592.61	1792.64	35615.1	1553.86	22.9204	0.0751588
705	A0A0B4J1I9	Protein Igkv4-55 (Fragment)	Igkv4-55	117	7693.49	10301.9	2188.94	16597.7	33286.4	14528.5	6728.1	21470.8	0.31336	0.116936
706	P54116	Erythrocyte band 7 integral membrane protein	Stom	284	16140.5	2963.26	19330.9	24142.4	13514.5	437.539	12811.6	12698.1	1.00893	0.990035
707	Q545S0	Sulfurtransferase	Tst	297	11854.3	29200.3	33135.1	1623.63	1114.16	1426.05	24729.9	1387.95	17.8176	0.0701954
708	Q9DCS9	NADH dehydrogenase [ubiquinone] 1 beta subcomplex subunit 10	Ndufb10	176	18529.8	18260.1	22357.9	473.425	2422.25	1082.37	19715.9	1326.01	14.8686	0.00163843
709	A2AKX3	Probable helicase senataxin	Setx	2646	8410.17	12653.1	3219.62	579.172	1384.05	3231.92	8094.28	1731.71	4.67415	0.136114
710	A2A6J8	Troponin I, fast skeletal muscle (Fragment)	Tnni2	190	170021	103479	85942.7	23290.5	32023.3	30421.2	119814	28578.3	4.19249	0.0690165
711	E9QJW0	Microsomal glutathione S-transferase 1	Mgst1	229	42324.5	65289.1	54083.1	1754.18	2328.13	4051.16	53898.9	2711.16	19.8804	0.0155609
712	A0A0A6YXC3	Protein Ighv1-52 (Fragment)	Ighv1-52	117	2416.87	1348.25	367.937	5075.57	3828.26	3470.79	1377.69	4124.87	0.333995	0.0244988
713	Q6ZWN5	40S ribosomal protein S9	Rps9	194	29764.9	30216.3	10707.2	7071.35	6233.35	312.552	23562.8	4539.08	5.1911	0.0856507

## Sheet: SPF>GF
Supplementary Table 1 - Host-derived proteins with higher abundance in SPF mice (SPF/GF > 2-fold, p < 0.05, 324 proteins)
No	Uniprot ID	Protein name	Gene name	No. of amino acids	SPF1 area	SPF2 area	SPF3 area	GF1 area	GF2 area	GF3 area	SPF_Average	GF_Average	SPF/GF	P-value SPFvsGF
1	D3YVN7	Elongation factor Tu	Gm9755	452	8.85066e+06	7.57903e+06	6.51749e+06	13362.7	12020.5	23681.5	7.64906e+06	16354.9	467.692	0.00771611
2	Q9D816	Cytochrome P450 2C55	Cyp2c55	490	1.50849e+06	2.12102e+06	3.01612e+06	11987.7	25888.2	31847.7	2.21521e+06	23241.2	95.3139	0.0376249
3	Q14BW6	Deoxyribonuclease	Dnase1	284	456948	504531	541158	6177.33	6568.58	7302.85	500879	6682.92	74.9492	0.00242068
4	Q9D0M3	Cytochrome c1, heme protein, mitochondrial	Cyc1	325	142092	162349	220823	1455.62	969.04	4873.68	175088	2432.78	71.9705	0.0179617
5	E9PX96	Protein Sva	Sva	165	75249.1	54250.5	96094.9	742.517	2283.28	234.42	75198.1	1086.74	69.1962	0.0252984
6	Q9D1A2	Cytosolic non-specific dipeptidase	Cndp2	475	2.30302e+06	2.87393e+06	3.27486e+06	41299.1	54714.4	30319	2.81727e+06	42110.8	66.9013	0.0101309
7	Q545G0	Proteasome subunit beta type	Psmb3	205	35303.4	53830.5	64442.5	1223.46	379.239	781.399	51192.1	794.698	64.4171	0.0272934
8	Q09098	Prostate and testis expressed protein 4	Pate4	99	63089.1	57869.1	98222.8	946.199	1322.28	1140.89	73060.3	1136.46	64.2877	0.0296557
9	Q8CEK3	Serine protease inhibitor kazal-like protein, minor form	Spinkl	90	643151	622209	952011	11748.8	20438.9	9468.64	739124	13885.4	53.2301	0.0208482
10	Q5BKQ4	Inactive pancreatic lipase-related protein 1	Pnliprp1	473	78243.8	46925.4	39774.6	1399.92	664.944	1231.74	54981.3	1098.87	50.0345	0.0448109
11	Q5NCJ9	Cytochrome b-c1 complex subunit 9	Uqcr10	64	68200.5	79054.8	90531.4	715.124	3198.06	1075.82	79262.2	1663	47.6622	0.00623526
12	A7VMV2	Crystallin, lamda 1, isoform CRA_a	Cryl1	319	108438	151426	204308	6106.31	3092.92	1714.82	154724	3638.01	42.5298	0.0318233
13	Q544Z9	Cytochrome b-5, isoform CRA_d	Cyb5a	134	626278	652881	786297	21742.1	14705.2	13327.9	688485	16591.7	41.4957	0.00528371
14	Q8VCN5	Cystathionine gamma-lyase	Cth	398	1.17498e+06	1.15597e+06	1.30562e+06	48670.9	24903.9	17686.2	1.21219e+06	30420.3	39.848	0.00110121
15	Q8K2B3	Succinate dehydrogenase [ubiquinone] flavoprotein subunit, mitochondrial	Sdha	664	505667	462578	507682	15359.4	9863.47	13225.8	491976	12816.2	38.387	0.000833434
16	A2AFW6	Mitochondrial carrier homolog 2	Mtch2	294	40428.2	43786.4	64377.5	1124.51	842.926	2087.45	49530.7	1351.63	36.6452	0.0230692
17	Q9D154	Leukocyte elastase inhibitor A	Serpinb1a	379	1.06009e+06	1.27843e+06	1.61632e+06	37571.3	45848	24839.5	1.31828e+06	36086.2	36.5313	0.0154482
18	Q3TD53	H-2 class II histocompatibility antigen, A-F beta chain	H2-Ab1	265	765694	738506	1.06043e+06	26247.6	30702.6	19977.3	854876	25642.5	33.3382	0.0150352
19	Q544N9	Monocarboxylate transporter 1	Slc16a1	493	16930.1	22905.8	24166.2	502.265	611.286	859.544	21334.1	657.698	32.4375	0.0113143
20	P62305	Small nuclear ribonucleoprotein E	Snrpe	92	56357.9	70279.1	88548.8	1072.57	4088.59	1537.77	71728.6	2232.98	32.1224	0.0167341
21	Q91V76	Ester hydrolase C11orf54 homolog	1		1.12385e+06	1.22396e+06	1.55824e+06	44051.2	50832.4	27884.7	1.30202e+06	40922.8	31.8165	0.0105154
22	Q8QZR3	Pyrethroid hydrolase Ces2a	Ces2a	558	55526.7	70979.7	90830.5	1753.16	3697.6	1591.65	72445.7	2347.47	30.8611	0.0202134
23	Q9R1P3	Proteasome subunit beta type-2	Psmb2	201	72832.1	89278.5	106637	760.66	1118.37	6908.6	89582.5	2929.21	30.5825	0.0100858
24	P14434	H-2 class II histocompatibility antigen, A-B alpha chain	H2-Aa	256	775959	609224	752412	24241.2	19719.6	31782.6	712532	25247.8	28.2215	0.00552498
25	P50431	Serine hydroxymethyltransferase, cytosolic	Shmt1	478	43132.6	61715.8	65548.8	2477.02	2474.85	1227.02	56799.1	2059.63	27.5773	0.0153508
26	A0A0A0MQA3	Alpha-1-antitrypsin 1-1	Serpina1a	436	219851	209984	141911	5436.71	7843.46	7608.93	190582	6963.03	27.3705	0.0172662
27	Q7JJ15	H-2 class I histocompatibility antigen, K-K alpha chain	H2-K1	369	167641	166433	225372	7329.4	7445.83	5767.5	186482	6847.58	27.2333	0.0114714
28	P10518	Delta-aminolevulinic acid dehydratase	Alad	330	88729.5	128240	157185	3144.87	8737.56	2157.82	124718	4680.08	26.6487	0.0252155
29	Q99J57	S-adenosylmethionine synthase	Mat2a	395	31285.9	65122.7	70026.6	3017.38	2285.61	1166.36	55478.4	2156.45	25.7267	0.0481582
30	P61971	Nuclear transport factor 2	Nutf2	127	85188.5	140571	135172	2069.99	3944.86	8470.8	120311	4828.55	24.9165	0.02149
31	Q4KL81	Actin, cytoplasmic 2	Actg1	375	2.88912e+06	3.53304e+06	4.81197e+06	160167	158706	138776	3.74471e+06	152550	24.5475	0.0238497
32	Q9R0H0	Peroxisomal acyl-coenzyme A oxidase 1	Acox1	661	408954	488124	609104	25160.1	13893	22458.9	502061	20504	24.486	0.0140543
33	P62315	Small nuclear ribonucleoprotein Sm D1	Snrpd1	119	45750.1	41146.3	50756.9	651.396	1944.69	3186.15	45884.4	1927.41	23.8062	0.0024081
34	Q9NYQ2	Hydroxyacid oxidase 2	Hao2	353	295739	359255	373392	7277.5	14004.1	22403.6	342795	14561.8	23.5408	0.00418342
35	Q4FK49	Inorganic pyrophosphatase	Ppa1	289	27557	54121.8	53247.8	697.019	2922.49	2158.31	44975.6	1925.94	23.3525	0.0379472
36	Q9DCW4	Electron transfer flavoprotein subunit beta	Etfb	255	261145	325399	366827	15891.4	12429.8	12507.2	317790	13609.4	23.3507	0.00998387
37	P28063	Proteasome subunit beta type-8	Psmb8	276	76863.4	99838.2	157397	4020.78	7132.93	3591.18	111366	4914.96	22.6586	0.0468026
38	P01887	Beta-2-microglobulin	B2m	119	392375	372984	487057	14784	14673.5	26591.1	417472	18682.9	22.3452	0.0071477
39	Q99LC5	Electron transfer flavoprotein subunit alpha, mitochondrial	Etfa	333	276498	377265	362342	15877	15933.8	13746.5	338702	15185.8	22.3039	0.00926035
40	Q8BMS1	Trifunctional enzyme subunit alpha, mitochondrial	Hadha	763	78656.8	138414	147862	4887.49	8141.47	3994.53	121644	5674.5	21.437	0.0328026
41	Q9CZ30	Obg-like ATPase 1	Ola1	396	44324.4	35635.4	38643	1367.87	2651.82	1647.03	39534.3	1888.91	20.9297	0.00385181
42	Q3TS44	Proteasome subunit alpha type	Psma1	263	179983	209934	311507	13348.8	13746.6	6969.08	233808	11354.8	20.591	0.030227
43	Q5EBQ2	MCG7941, isoform CRA_f	Pebp1	187	233883	335892	288825	8931.23	19447.3	14270.2	286200	14216.2	20.1319	0.0109088
44	P70168	Importin subunit beta-1	Kpnb1	876	4220.43	6752.41	7511.64	455.211	231.098	234.422	6161.49	306.91	20.0759	0.0271285
45	Q9DCM0	Persulfide dioxygenase ETHE1, mitochondrial	Ethe1	254	1.45497e+06	1.64379e+06	1.95178e+06	91866.7	86810.5	73208.1	1.68351e+06	83961.8	20.051	0.00802184
46	Q91XE4	N-acyl-aromatic-L-amino acid amidohydrolase (carboxylate-forming)	Acy3	318	88218.1	81664.1	89546.5	6839.52	3392.53	2759.38	86476.2	4330.48	19.9692	8.02707e-05
47	E9QJW0	Microsomal glutathione S-transferase 1	Mgst1	229	42324.5	65289.1	54083.1	1754.18	2328.13	4051.16	53898.9	2711.16	19.8804	0.0155609
48	Q64133	Amine oxidase [flavin-containing] A	Maoa	526	2.14441e+06	2.85371e+06	3.96874e+06	110031	166016	181817	2.98895e+06	152621	19.5841	0.0331162
49	P47791	Glutathione reductase, mitochondrial	Gsr	500	173945	223194	272141	10580	14308	9691.28	223093	11526.4	19.3549	0.0172855
50	Q9CXN7	Phenazine biosynthesis-like domain-containing protein 2	Pbld2	288	55747.8	71633.9	82147.6	3937.9	6484.71	494.638	69843.1	3639.08	19.1925	0.0102471
51	Q9R112	Sulfide:quinone oxidoreductase, mitochondrial	Sqrdl	450	299037	408576	491448	12851.4	22696.2	27760.1	399687	21102.6	18.9402	0.0204478
52	Q3UPK6	Proteasome subunit alpha type	Psma5	241	180354	202994	273856	2304.73	10836.3	21729.1	219068	11623.4	18.8472	0.0150765
53	Q9CZ13	Cytochrome b-c1 complex subunit 1, mitochondrial	Uqcrc1	480	873303	966904	1.09883e+06	45189.7	52668.5	58733.6	979678	52197.3	18.7688	0.00481507
54	Q9CQA3	Succinate dehydrogenase [ubiquinone] iron-sulfur subunit, mitochondrial	Sdhb	282	142221	189134	235429	8350.75	15817.5	6401.91	188928	10190.1	18.5404	0.0209227
55	Q921I1	Serotransferrin	Tf	697	867902	1.49646e+06	1.34654e+06	51396.2	122350	27364.5	1.23697e+06	67037	18.452	0.0231846
56	Q80X90	Filamin-B	Flnb	2602	807039	830020	833714	56881.1	40848.9	36206.3	823591	44645.5	18.4474	4.94591e-07
57	A2ANT5	MCG19332	Mup4	178	79724.8	94695.4	91986.7	8858.78	3812.68	1789.59	88802.3	4820.35	18.4224	0.000703436
58	Q9JHU9	Inositol-3-phosphate synthase 1	Isyna1	557	63948.1	55293.2	55752.1	5526.97	1861.69	2142.16	58331.1	3176.94	18.3608	0.000703294
59	Q3TAW7	Beta-galactosidase	Glb1	647	25370.8	25556.6	25721.9	3230.08	646.686	312.56	25549.8	1396.44	18.2963	0.00129715
60	Q9CR68	Cytochrome b-c1 complex subunit Rieske, mitochondrial	Uqcrfs1	274	830713	913478	1.02076e+06	40473.2	47435.1	64400.8	921650	50769.7	18.1536	0.00350625
61	Q3UBY5	Cathepsin C, isoform CRA_b	Ctsc	462	145668	159700	167605	7861.63	6632.49	11629.3	157658	8707.79	18.1054	0.00114457
62	Q8BFR4	N-acetylglucosamine-6-sulfatase	Gns	544	540072	476339	463857	61006.7	10848.6	10052.9	493423	27302.7	18.0723	0.000169866
63	Q5HZK3	Proteasome (Prosome, macropain) 28 subunit, alpha	Psme1	249	19396.1	24036.3	25085.5	2826.67	543.631	432.007	22839.3	1267.44	18.0201	0.00215522
64	Q64521	Glycerol-3-phosphate dehydrogenase, mitochondrial	Gpd2	727	801069	827308	1.3263e+06	34865.2	62600.6	71349.6	984893	56271.8	17.5024	0.0317796
65	P21981	Protein-glutamine gamma-glutamyltransferase 2	Tgm2	686	8446.42	16401.8	17405.6	1078.8	339.442	1001.21	14084.6	806.484	17.4642	0.0418244
66	P99028	Cytochrome b-c1 complex subunit 6, mitochondrial	Uqcrh	89	192162	212109	264519	14094.3	10584.8	13934.5	222930	12871.2	17.3201	0.0102259
67	Q64442	Sorbitol dehydrogenase	Sord	357	180972	244599	234832	12471.6	15613.4	10088.4	220134	12724.5	17.3001	0.00863948
68	Q545N7	Creatine kinase U-type, mitochondrial	Ckmt1	418	1.46558e+06	1.65689e+06	2.17221e+06	147775	49347.4	109296	1.76489e+06	102139	17.2792	0.0144224
69	Q9DB77	Cytochrome b-c1 complex subunit 2, mitochondrial	Uqcrc2	453	672132	753664	910501	34321.2	52492.9	50183.4	778766	45665.8	17.0536	0.0086386
70	P56480	ATP synthase subunit beta, mitochondrial	Atp5b	529	1.26106e+06	1.81104e+06	2.30399e+06	86626.6	102849	137721	1.79203e+06	109065	16.4308	0.0303053
71	B1ASZ3	Glycerol kinase	Gk	552	376531	412214	566893	33648.9	24902.7	25227.9	451879	27926.5	16.181	0.018269
72	Q3U344	ADP-ribosylation factor 3	Arf3	181	47506	76961.8	89216	639.678	6783.89	6136.74	71228	4520.1	15.758	0.0301754
73	Q5SUV8	Aromatic-L-amino-acid decarboxylase	Ddc	480	109109	117213	144986	14087.6	5601.33	4594.48	123769	8094.46	15.2906	0.00566548
74	O09131	Glutathione S-transferase omega-1	Gsto1	240	74555.6	96553.3	147453	6468.36	7921.65	6452.54	106187	6947.52	15.2842	0.0441425
75	Q71LX8	Heat shock protein 84b	Hsp90ab1	724	51108.9	79140.2	87343.1	3966.36	5233.04	5344.94	72530.7	4848.11	14.9606	0.0251181
76	P55292	Desmocollin-2	Dsc2	902	176048	159857	169302	11454.9	9159.55	13217.2	168402	11277.2	14.9329	0.000472531
77	Q9DCS9	NADH dehydrogenase [ubiquinone] 1 beta subcomplex subunit 10	Ndufb10	176	18529.8	18260.1	22357.9	473.425	2422.25	1082.37	19715.9	1326.01	14.8686	0.00163843
78	A5GZX3	Lactoylglutathione lyase	Glo1	184	378188	425413	456808	23881.9	39710.3	21453.1	420136	28348.4	14.8204	0.00211281
79	Q921G7	Electron transfer flavoprotein-ubiquinone oxidoreductase, mitochondrial	Etfdh	616	88621.8	76540.3	116293	4364.11	4777.43	9934.89	93818.5	6358.81	14.7541	0.0158898
80	A0A0R4J107	Acylamino-acid-releasing enzyme (Fragment)	Apeh	716	696988	721142	846633	62581.5	48582.8	44402.7	754921	51855.6	14.5581	0.0039062
81	P07310	Creatine kinase M-type	Ckm	381	12540.3	18892.2	21024.5	978.518	993.854	1639.47	17485.7	1203.95	14.5236	0.0229539
82	A0A0R4J083	Long-chain-specific acyl-CoA dehydrogenase, mitochondrial	Acadl	430	283010	275064	267909	25231.2	19124.8	13069.5	275328	19141.8	14.3836	2.20738e-06
83	Q9Z0Y2	Phospholipase A2	Pla2g1b	146	8.78104e+06	5.04512e+06	4.94341e+06	322231	436212	553821	6.25652e+06	437421	14.3032	0.0436456
84	P42125	Enoyl-CoA delta isomerase 1, mitochondrial	Eci1	289	38979.3	62763.3	78616.9	4915.9	3044.13	4753.97	60119.8	4238	14.1859	0.0396329
85	Q3TKP4	Fructose bisphosphatase 2	Fbp2	339	102877	162278	178970	13702.2	9047.51	8595.97	148042	10448.6	14.1686	0.0265286
86	Q8R086	Sulfite oxidase, mitochondrial	Suox	546	75712.8	97366.8	139231	3089	13872.1	5158.44	104104	7373.18	14.1192	0.0318912
87	P50544	Very long-chain specific acyl-CoA dehydrogenase, mitochondrial	Acadvl	656	326195	334463	357261	16177.1	22025.7	34571.3	339306	24258	13.9874	5.07167e-05
88	Q4G0D3	Serine (Or cysteine) peptidase inhibitor, clade I, member 2	Serpini2	405	595292	417134	342099	29580.3	39766.2	29253.8	451508	32866.8	13.7375	0.0304678
89	Q06185	ATP synthase subunit e, mitochondrial	Atp5i	71	67985.2	70393.5	51669.4	3766.72	2409.91	7839.93	63349.4	4672.19	13.5588	0.00656095
90	P12787	Cytochrome c oxidase subunit 5A, mitochondrial	Cox5a	146	218786	224472	301258	16696.9	13862.6	24442.6	248172	18334	13.5361	0.0122187
91	Q497E4	Actin, alpha cardiac muscle 1	Actc1	377	2.89168e+06	2.93142e+06	3.27064e+06	197324	244269	231106	3.03125e+06	224233	13.5183	0.00162159
92	Q99PT1	Rho GDP-dissociation inhibitor 1	Arhgdia	204	630949	1.041e+06	1.20786e+06	61182.3	92011.6	60601.7	959937	71265.2	13.4699	0.0348298
93	Q9CRY7	Glycerophosphodiester phosphodiesterase domain-containing protein 1	Gdpd1	314	146513	139753	126233	9799.01	9767.31	11580.8	137499	10382.4	13.2435	0.00200987
94	Q64444	Carbonic anhydrase 4	Ca4	305	100193	107787	123704	10131.3	7732.46	7184.06	110561	8349.27	13.242	0.00403998
95	F8WGL3	Cofilin-1	Cfl1	227	43012.7	47765.3	61273.3	1000.22	4360.37	6157.07	50683.8	3839.22	13.2016	0.00928363
96	Q9Z0K8	Pantetheinase	Vnn1	512	607687	636277	720060	53364	41314.4	55470.8	654675	50049.7	13.0805	0.00270495
97	Q9R1P0	Proteasome subunit alpha type-4	Psma4	261	129594	148502	203108	9471.84	13094.7	14793.9	160401	12453.5	12.88	0.0210315
98	P05213	Tubulin alpha-1B chain	Tuba1b	451	35466	56317	76420.4	3948.13	5193.38	3919.04	56067.8	4353.52	12.8787	0.0483352
99	P09528	Ferritin heavy chain	Fth1	182	1.05437e+06	1.22519e+06	1.35911e+06	103773	96818.7	82018.8	1.21289e+06	94203.6	12.8752	0.00594637
100	W0UUX7	Angiogenin-4	Ang4	144	25642.8	22352.1	27870.7	1361.69	2903.55	1735.34	25288.5	2000.19	12.643	0.00266815
101	Q03265	ATP synthase subunit alpha, mitochondrial	Atp5a1	553	769453	917083	1.02239e+06	57756.8	72612.9	84044.5	902976	71471.4	12.6341	0.00720337
102	Q3ULT2	Actinin alpha 4	Actn4	912	216412	354314	395542	27128.6	36912.7	12789.3	322090	25610.2	12.5766	0.030044
103	P63038	60 kDa heat shock protein, mitochondrial	Hspd1	573	49155.4	74525.2	59822.9	6400.12	4921.22	3320.96	61167.8	4880.77	12.5324	0.0155636
104	Q8VEM8	Phosphate carrier protein, mitochondrial	Slc25a3	357	183036	178852	258569	18234.9	18753.5	13050	206819	16679.5	12.3996	0.0176623
105	Q64GA5	Egg and early embryo abundant protein	Pla2g4c	597	12109.9	7706.3	14366.3	1025.1	1500.52	234.381	11394.2	920	12.385	0.0295285
106	Q3UCD9	Cathepsin D	Ctsd	410	99497.9	130502	163864	8729.87	15628.8	7560.5	131288	10639.7	12.3394	0.0213023
107	E9PZF0	Nucleoside diphosphate kinase	Gm20390	267	508908	629421	680586	52397.1	67395.9	28257.1	606305	49350	12.2858	0.00615865
108	E9PUL3	Protein Clca3b	Clca3b	1044	81577.5	70823.3	73485.3	1553.2	6558.36	10293.1	75295.4	6134.87	12.2733	0.000107128
109	E9PYN9	Amine oxidase	Aoc1	756	411424	401573	436200	33667.5	37314.5	30897.5	416399	33959.8	12.2615	0.000511451
110	P20029	78 kDa glucose-regulated protein	Hspa5	655	199145	239397	217531	8356.35	18310.6	28305.2	218691	18324.1	11.9346	0.000679123
111	Q4FK86	Peptidoglycan-recognition protein	Pglyrp1	182	278163	241982	305128	21559.1	25312.2	23526.7	275091	23466	11.723	0.00511837
112	Q8K0C9	GDP-mannose 4,6 dehydratase	Gmds	372	1.12897e+06	1.44278e+06	2.08666e+06	107536	138993	151893	1.5528e+06	132808	11.6921	0.0369652
113	Q9D8W7	OCIA domain-containing protein 2	Ociad2	154	32719.4	55163.5	68670.5	2340.11	5838.23	5293.71	52184.5	4490.68	11.6206	0.0437608
114	D3YYJ7	Pentaxin	Mptx2	219	2.34334e+06	1.7297e+06	2.3364e+06	138708	242438	176502	2.13648e+06	185883	11.4937	0.00948508
115	O70456	14-3-3 protein sigma	Sfn	248	139575	160730	189996	10816	20588.1	11474.6	163433	14292.9	11.4346	0.00731144
116	B1AR69	Protein Myh13	Myh13	1938	113681	71487.4	63197.7	5979.09	8328.92	7582.86	82788.6	7296.96	11.3456	0.0400577
117	P47856	Glutamine--fructose-6-phosphate aminotransferase [isomerizing] 1	Gfpt1	697	21192	31489.6	26399.9	3251.34	3535	390.703	26360.5	2392.35	11.0187	0.00912295
118	P36552	Oxygen-dependent coproporphyrinogen-III oxidase, mitochondrial	Cpox	443	28427.7	31039.4	27963.5	1098.23	5344.38	1557.8	29143.5	2666.8	10.9283	0.000173316
119	Q7TMR0	Lysosomal Pro-X carboxypeptidase	Prcp	491	30993.5	26690.2	27160.1	5327.07	486.345	2027.16	28281.3	2613.53	10.8211	0.000204446
120	Q62468	Villin-1	Vil1	827	2.14581e+06	2.17606e+06	3.1276e+06	269809	207102	225820	2.48316e+06	234244	10.6007	0.0196488
121	B2RXS4	Plexin-B2	Plxnb2	1842	19592	22531.6	19253	3922.35	716.763	1153.07	20458.9	1930.73	10.5965	0.000215565
122	P51432	1-phosphatidylinositol 4,5-bisphosphate phosphodiesterase beta-3	Plcb3	1234	76904.2	59445.9	106087	10119.2	10615.5	2329.42	80812.3	7688.03	10.5114	0.029027
123	E9Q5J9	Tropomyosin alpha-3 chain	Tpm3	285	153164	142371	138318	13112.8	25227.8	3500.98	144618	13947.2	10.369	0.000145695
124	Q62082	Myosin regulatory light chain 10	Myl10	202	402825	282828	284200	26387.5	34206.5	33146.2	323285	31246.7	10.3462	0.0177423
125	P70158	Acid sphingomyelinase-like phosphodiesterase 3a	Smpdl3a	445	220806	158286	209770	18998.3	14021.8	24580.5	196287	19200.2	10.2232	0.0101956
126	P50543	Protein S100-A11	S100a11	98	17268.7	24230.5	19023.9	1246.53	3299.66	1437.78	20174.4	1994.65	10.1142	0.00815091
127	Q8C1P2	Alpha-defensin 21	Defa21	93	363521	424421	455274	40988.6	48690.8	33969.7	414405	41216.4	10.0544	0.00436757
128	G5E8B4	MCG147827	Scgb2b2	114	795917	532291	429380	49368.7	57834.6	67870.6	585863	58358	10.0391	0.0399575
129	Q8C6C9	Protein LEG1 homolog	Leg1	337	3.19568e+07	2.55222e+07	2.87255e+07	3.18914e+06	2.26896e+06	3.17709e+06	2.87348e+07	2.8784e+06	9.98292	0.00425927
130	A2ACG7	Dolichyl-diphosphooligosaccharide--protein glycosyltransferase subunit 2	Rpn2	615	15805	20692.7	26916	2902.35	2407.74	1053.6	21137.9	2121.23	9.96491	0.0246465
131	Q9CPX4	Ferritin	Ftl1	183	574804	746529	772343	72472.6	75425.8	66470.1	697892	71456.2	9.76671	0.00955298
132	P56389	Cytidine deaminase	Cda	146	57793.7	86005.4	111213	5809.74	8614.33	11887.8	85004.1	8770.6	9.69193	0.0371149
133	Q5SX39	Myosin-4	Myh4	1939	556385	430949	345867	37956.3	48045.1	51992.8	444400	45998.1	9.66127	0.0223258
134	J3QP71	Basigin (Fragment)	Bsg	197	236996	266199	330411	31559	22346.5	32770.1	277869	28891.9	9.61754	0.0111942
135	Q9DBX3	Sushi domain-containing protein 2	Susd2	820	1.18597e+06	1.55128e+06	1.83371e+06	159605	136369	183280	1.52366e+06	159751	9.53768	0.0179569
136	A2CGB6	Major urinary protein 6	Mup6	180	585153	611348	471939	50929.8	54955.4	69323.3	556146	58402.8	9.52259	0.0065742
137	Q9DC50	Peroxisomal carnitine O-octanoyltransferase	Crot	612	53927	57110.2	45138.2	6386.19	1490.5	8557.35	52058.5	5478.01	9.50317	0.00108219
138	Q0VEE0	5' nucleotidase, ecto	Nt5e	576	52834.7	53806.9	82522.3	5674.73	9138.12	5125.24	63054.6	6646.03	9.48756	0.0268826
139	A0A0A6YWR2	Ig gamma-1 chain C region secreted form (Fragment)	Ighg1	393	39522.3	51889.2	65324.3	2922.69	8676.63	4948.21	52245.3	5515.84	9.47186	0.0202369
140	Q9D3P8	Plasminogen receptor (KT)	Plgrkt	147	34865.1	39703.7	50670.6	2241.47	4961.53	6055.57	41746.5	4419.52	9.44592	0.0117095
141	P40124	Adenylyl cyclase-associated protein 1	Cap1	474	31938.6	39045	54638.4	3321.58	4537.2	5506.12	41874	4454.97	9.39939	0.0296974
142	Q5I0W0	ATP synthase F(0) complex subunit B1, mitochondrial	Atp5f1	256	47511.8	68253.6	70315.3	3400.54	6625.32	9932.26	62026.9	6652.71	9.32356	0.0125788
143	A2RS22	Coronin	Coro1b	484	115407	126506	130496	12120.4	14872.9	13336.1	124136	13443.1	9.23418	0.00125111
144	Q91WS0	CDGSH iron-sulfur domain-containing protein 1	Cisd1	108	210422	250768	315047	33529.8	21860.7	29766.5	258745	28385.7	9.11535	0.0160809
145	G3X9L6	MCG55033	Gm10250	160	52500.1	78815.2	74186	4605.5	10872.8	7101.06	68500.4	7526.46	9.10128	0.013813
146	Q792Z7	D(B) glycoprotein	H2-D1	362	214816	138887	183962	16111.1	16748.3	26658.7	179221	19839.4	9.03363	0.0167563
147	Q148B1	Cytochrome P450, family 2, subfamily c, polypeptide 65	Cyp2c65	490	60379.4	91178.7	114401	9639.69	11230.6	8627.5	88653	9832.58	9.01625	0.0369426
148	Q6RI64	Proteasome subunit beta type	Psmb1	240	56779.9	77734.1	114442	3171.34	14448.2	10019.6	82985.3	9213.04	9.00737	0.0439612
149	Q545F0	MCG3124, isoform CRA_b	Mif	115	327644	348556	347431	38001	53615.1	23106.9	341210	38241	8.92263	1.86307e-05
150	D3Z6V6	Protein Enpp7	Enpp7	446	620919	840133	1.1022e+06	121908	103266	68403.5	854418	97859	8.73111	0.0308394
151	G5E8T9	Hydroxyacyl glutathione hydrolase	Hagh	309	762025	773710	951582	104883	69411	111691	829106	95328.6	8.69735	0.00521401
152	Q9R100	Cadherin-17	Cdh17	827	1.11484e+07	1.1852e+07	1.43544e+07	1.71215e+06	1.37675e+06	1.20802e+06	1.24516e+07	1.43231e+06	8.6934	0.00669388
153	Q3TQ70	Beta1 subnuit of GTP-binding protein	Gnb1	340	95494.9	86872.3	123395	10156	13404.2	11974.5	101921	11844.9	8.60463	0.014134
154	O88844	Isocitrate dehydrogenase [NADP] cytoplasmic	Idh1	414	264836	377895	420758	51426.1	47959.9	24263.5	354496	41216.5	8.60082	0.0186098
155	Q3TC45	Protein S100-A10	S100a10	97	21832.3	23769.7	32861.6	4298.94	4713.29	134.047	26154.5	3048.76	8.57875	0.0110566
156	Q5SS40	14-3-3 protein epsilon	Ywhae	255	111873	215174	229570	32371.9	21770.4	10880.6	185539	21674.3	8.56033	0.0441886
157	P24549	Retinal dehydrogenase 1	Aldh1a1	501	788343	1.00915e+06	1.15582e+06	110775	119401	115325	984438	115167	8.54792	0.0147222
158	P19536	Cytochrome c oxidase subunit 5B, mitochondrial	Cox5b	128	276424	303218	343167	38177.9	37997.7	32297.4	307603	36157.7	8.50727	0.0047278
159	P61922	4-aminobutyrate aminotransferase, mitochondrial	Abat	500	36951.2	23418	24649.5	4392.79	2983.74	2627.11	28339.6	3334.55	8.49877	0.0270316
160	P97450	ATP synthase-coupling factor 6, mitochondrial	Atp5j	108	42679.6	56077.4	73120.3	10317.6	8735.97	1209.19	57292.4	6754.26	8.48241	0.0209464
161	P06745	Glucose-6-phosphate isomerase	Gpi	558	242283	349944	402214	32557.3	58941.9	26387.9	331480	39295.7	8.43553	0.0211495
162	Q9WU81	Glucose-6-phosphate exchanger SLC37A2	Slc37a2	501	230851	269351	262552	34645.7	32735.9	23181	254251	30187.6	8.42239	0.00139644
163	Q9CVB6	Actin-related protein 2/3 complex subunit 2	Arpc2	300	22265	26975.3	21260.8	2020.18	2948.73	3417.18	23500.4	2795.36	8.40691	0.00514893
164	P23492	Purine nucleoside phosphorylase	Pnp	289	73382.3	110398	94709.4	16725.3	15150.7	1481.86	92829.9	11119.3	8.34855	0.00778917
165	P09103	Protein disulfide-isomerase	P4hb	509	386654	598590	762645	91654.7	47378.9	71450.7	582630	70161.4	8.30413	0.0406154
166	P97792	Coxsackievirus and adenovirus receptor homolog	Cxadr	365	236046	203649	241669	17538.5	24206.1	40473.8	227121	27406.1	8.28725	0.000495181
167	P68510	14-3-3 protein eta	Ywhah	246	10672.2	15716.1	19320.7	2965.38	856.041	1711.78	15236.3	1844.4	8.26086	0.027652
168	A2AE89	Glutathione S-transferase Mu 1	Gstm1	244	203332	312515	298772	35739.7	39124.4	24195.1	271540	33019.8	8.22355	0.0186764
169	Q11011	Puromycin-sensitive aminopeptidase	Npepps	920	112446	158469	219016	11261.7	26003.8	23415.1	163310	20226.9	8.07392	0.0409439
170	P14152	Malate dehydrogenase, cytoplasmic	Mdh1	334	113028	213586	189182	26366.3	22543.6	14976.9	171932	21295.6	8.07357	0.0367178
171	Q9D0F9	Phosphoglucomutase-1	Pgm1	562	69345.7	112432	121758	9917.36	13651.5	14110.4	101179	12559.7	8.05578	0.0308915
172	Q93092	Transaldolase	Taldo1	337	84370.8	160952	144603	15470.8	11609.8	21401.5	129975	16160.7	8.04265	0.0376742
173	Q8K154	UDP-glucuronosyltransferase	Ugt2b34	532	183332	272325	340506	36195.1	30650.7	33273.7	265388	33373.2	7.95213	0.0362371
174	Q99M73	Keratin, type II cuticular Hb4	Krt84	603	12449.7	10752.1	8559.49	3232.06	263.354	508.272	10587.1	1334.56	7.933	0.00360508
175	P63101	14-3-3 protein zeta/delta	Ywhaz	245	319998	521177	553495	38335.5	84217.7	53869	464890	58807.4	7.9053	0.0275222
176	Q3UE92	X-prolyl aminopeptidase (Aminopeptidase P) 1, soluble, isoform CRA_b	Xpnpep1	666	61563.1	82443.1	97799.4	2585.25	26583.4	1687.17	80601.9	10285.3	7.83663	0.00723042
177	Q91X72	Hemopexin	Hpx	460	95904.9	164785	167936	4950.23	31758.4	18418.2	142875	18375.6	7.77526	0.0246542
178	Q5SW88	Protein Rab1a	Rab1a	202	186563	273434	330593	28171.7	44285.5	29586.4	263530	34014.5	7.74758	0.0301219
179	Q3UZZ6	Sulfotransferase 1 family member D1	Sult1d1	295	116162	210587	214531	26222.2	25249.7	19111.9	180427	23527.9	7.66863	0.0389522
180	P70441	Na(+)/H(+) exchange regulatory cofactor NHE-RF1	Slc9a3r1	355	1.06095e+06	961675	1.26716e+06	145443	149729	135263	1.0966e+06	143478	7.64297	0.00867607
181	P08752	Guanine nucleotide-binding protein G(i) subunit alpha-2	Gnai2	355	87425.4	109973	136428	13977.4	15937	13981.8	111275	14632.1	7.6049	0.0206169
182	P70677	Caspase-3	Casp3	277	71156.6	75652.2	88144.3	15515.9	9065.95	6409.43	78317.7	10330.4	7.58127	0.00120926
183	Q91WU0	Carboxylesterase 1F	Ces1f	561	74446.8	80885.1	76802.3	13398	11575.7	5750.84	77378	10241.5	7.55535	3.14495e-05
184	Q3U0B3	Dehydrogenase/reductase SDR family member 11	Dhrs11	260	41270.6	51636.7	62897.3	10176.5	8529.74	2135.37	51934.9	6947.19	7.47567	0.0104282
185	P10605	Cathepsin B	Ctsb	339	405480	328475	354969	54038.8	56222.3	35560.6	362975	48607.2	7.46751	0.00294192
186	Q91XL1	Leucine-rich HEV glycoprotein	Lrg1	342	38862.2	40871.3	44096.8	192.958	9159.89	7232.55	41276.8	5528.46	7.46623	0.00115343
187	Q99J77	N-acetylneuraminic acid synthase (Sialic acid synthase)	Nans	359	25645.9	54429.1	35784.8	679.691	10998.8	3869.73	38619.9	5182.72	7.45166	0.0451046
188	Q9D3H2	Odorant-binding protein 1a	Obp1a	163	379300	250031	259085	24251.5	48944.9	47422.2	296138	40206.2	7.36549	0.0222389
189	Q8R3P0	Aspartoacylase	Aspa	312	21841.8	19310.4	16196	1643.28	468.566	5700.55	19116.1	2604.13	7.34067	0.00192139
190	Q14BR4	ADP-ribosylation factor 4	Arf4	180	166671	242457	268715	22043.8	37793.6	33964.3	225947	31267.3	7.22633	0.0216907
191	P15626	Glutathione S-transferase Mu 2	Gstm2	218	88589	135416	125615	11690.7	26552.7	10172.8	116540	16138.7	7.22112	0.0117506
192	P19639	Glutathione S-transferase Mu 3	Gstm3	218	46153.4	68065.5	61986.2	7717.73	12212	4563.49	58735.1	8164.42	7.19402	0.00999018
193	Q14AA6	GTP-binding nuclear protein Ran	1700009N14Rik	216	15690.9	24233.7	22191.6	6115.34	1414.7	1155.84	20705.4	2895.29	7.15141	0.00717416
194	Q3V100	Mannose-6-phosphate isomerase	Mpi	423	8627.73	14739.4	15184.8	4955.59	229.999	319.566	12850.6	1835.05	7.00288	0.0164201
195	Q14BZ3	Latexin	Lxn	222	54678.1	54063.2	62472.3	6243.26	9328.56	9166.43	57071.2	8246.08	6.92101	0.00112004
196	Q3V0K9	Plastin-1	Pls1	630	1.26801e+06	1.2436e+06	1.67779e+06	267145	159259	179130	1.39647e+06	201845	6.91852	0.010423
197	Q545A2	ADP/ATP translocase 2	Slc25a5	298	660942	804503	1.17293e+06	115484	137171	133514	879457	128723	6.83217	0.0386314
198	Q64727	Vinculin	Vcl	1066	38990.4	52652.4	34299.3	6206.21	9626.66	2719.14	41980.7	6184	6.78859	0.0143679
199	Q9DCD0	6-phosphogluconate dehydrogenase, decarboxylating	Pgd	483	106089	200806	202648	27626.9	16825.8	31289.1	169848	25247.3	6.72736	0.0430982
200	Q9DCC4	Pyrroline-5-carboxylate reductase 3	Pycrl	274	24166.2	28103.2	39883.1	5997.05	2336.54	5506.92	30717.5	4613.5	6.65817	0.0257405
201	Q07417	Short-chain specific acyl-CoA dehydrogenase, mitochondrial	Acads	412	190803	287906	336651	64282.9	28647.4	31057.7	271787	41329.4	6.57611	0.0263065
202	Q9D312	Keratin, type I cytoskeletal 20	Krt20	431	111141	129094	195477	20553.7	23379.3	24187.7	145237	22706.9	6.39618	0.0409088
203	P52840	Sulfotransferase 1A1	Sult1a1	291	97671.9	130697	150442	9754.49	38909.6	10715.7	126270	19793.3	6.37946	0.007213
204	Q9CZB0	Succinate dehydrogenase cytochrome b560 subunit, mitochondrial	Sdhc	169	99864.6	124506	174985	27702.8	17808.8	17928.2	133119	21146.6	6.29504	0.0344247
205	A0A140T8K8	60S ribosomal protein L13	Rpl13-ps3	207	6764.91	6396.27	6289.69	1119.05	805.952	1183.44	6483.62	1036.15	6.25744	1.16861e-05
206	Q3UEK1	Mannose binding lectin (C), isoform CRA_b	Mbl2	244	40108.3	26126.9	28860	4850.15	3384.93	7123.57	31698.4	5119.55	6.19163	0.0197125
207	B1ATI0	Aldehyde dehydrogenase	Aldh3a2	532	247614	269668	334866	47929.7	39669.8	50608.7	284050	46069.4	6.16569	0.0109529
208	Q4FK74	ATP synthase subunit delta, mitochondrial	Atp5d	168	122961	160748	210670	33260.9	18535.1	28405.9	164793	26734	6.16417	0.0292641
209	Q8BND5	Sulfhydryl oxidase 1	Qsox1	748	91118.2	79050.6	103423	19723.7	22591.1	2086.05	91197.4	14800.3	6.16187	0.00135548
210	Q1RME4	CAR-like soluble protein	Gm1123	390	1.22277e+06	1.11409e+06	1.2028e+06	156511	189914	228519	1.17989e+06	191648	6.15653	6.23669e-05
211	Q3UNI8	D-dopachrome decarboxylase	Ddt	118	532303	614305	581221	89716.3	78847.2	112360	575943	93641.3	6.15053	0.000662197
212	Q60605	Myosin light polypeptide 6	Myl6	151	179492	185856	222599	28296.6	36673.8	31109.9	195982	32026.8	6.11933	0.0053789
213	A8IP69	14-3-3 protein gamma	Ywhag	247	15096.2	26360.4	21879.7	3076.04	4519.42	2923.21	21112.1	3506.22	6.02133	0.0303812
214	P11352	Glutathione peroxidase 1	Gpx1	201	207540	281222	348765	38141.4	37556.3	63874.6	279176	46524.1	6.00066	0.0251682
215	A2RSV8	Cytochrome c oxidase subunit 4 isoform 1, mitochondrial	Cox4i1	169	712668	838649	1.20693e+06	164034	139449	157260	919417	153581	5.98653	0.0352276
216	Q8BK48	Pyrethroid hydrolase Ces2e	Ces2e	559	69615.2	113090	130901	20133.6	15996	16801.5	104535	17643.7	5.92481	0.0406021
217	Q00898	Alpha-1-antitrypsin 1-5	Serpina1e	413	2.1088e+06	1.39033e+06	1.45092e+06	241982	276868	322133	1.65002e+06	280328	5.88602	0.0260707
218	B1B1A8	Myosin light chain kinase, smooth muscle	Mylk	1950	43186	75788	51069.6	4493.02	23682	860.808	56681.2	9678.62	5.85633	0.0212885
219	Q61171	Peroxiredoxin-2	Prdx2	198	41184.4	79711.9	73876.2	9035.64	15669.9	9225.74	64924.2	11310.4	5.7402	0.0426552
220	Q9R0M5	Thiamin pyrophosphokinase 1	Tpk1	243	56124.8	75756.1	84069.3	7042.93	3551.83	27335.2	71983.4	12643.3	5.69339	0.00614229
221	P01647	Ig kappa chain V-V region HP 124E1	1		92763.8	169709	181306	31307.1	22756.7	25646.4	147926	26570.1	5.5674	0.0475844
222	G3XA48	Isopentenyl-diphosphate Delta-isomerase 1	Idi1	283	37356.8	39119.3	36058.7	7577.81	6300.6	6464.48	37511.6	6780.96	5.5319	0.000121079
223	Q8R1E9	ABPBG27	Scgb2b27	112	61276.1	40913.2	38002.8	8789.91	8032.26	8765.07	46730.7	8529.08	5.47898	0.0346891
224	Q3ULF7	Actin-related protein 3	Actr3	418	5603.72	7777.88	8430.81	1302.56	1476.71	1204.12	7270.8	1327.8	5.47583	0.0193263
225	A2AQ99	Protein Duox2	Duox2	1517	19634.1	11426.7	15166.6	695.795	1258.79	6528.91	15409.1	2827.83	5.44909	0.0156892
226	Q8VDD5	Myosin-9	Myh9	1960	117611	114339	125124	29701.9	30110.6	5730.72	119024	21847.8	5.4479	0.00279393
227	P40142	Transketolase	Tkt	623	351102	427505	475955	54887.2	116340	60830.3	418187	77352.4	5.40626	0.00341256
228	P21447	Multidrug resistance protein 1A	Abcb1a	1276	818198	1.01725e+06	1.38333e+06	222059	219046	158168	1.07292e+06	199758	5.37113	0.0323863
229	P27773	Protein disulfide-isomerase A3	Pdia3	505	243534	382018	368658	75536	38918.8	75394.6	331403	63283.1	5.23683	0.019882
230	Q08189	Protein-glutamine gamma-glutamyltransferase E	Tgm3	693	282973	149572	212071	35744.6	42019.7	47581.6	214872	41782	5.14269	0.0451753
231	P48771	Cytochrome c oxidase subunit 7A2, mitochondrial	Cox7a2	83	176962	191152	309983	36005.7	39849.1	56023.4	226033	43959.4	5.14185	0.0470689
232	P51162	Gastrotropin	Fabp6	128	1.40938e+06	1.71751e+06	2.03573e+06	408241	338530	264829	1.72087e+06	337200	5.10342	0.0131865
233	Q8R016	Bleomycin hydrolase	Blmh	455	381727	391301	357353	76973.8	68812.7	76020.1	376793	73935.5	5.09624	0.000591844
234	Q9JLI0	Aldo-keto reductase a	Akr1c12	323	70189.7	138543	124583	32687.3	6953.09	26112	111105	21917.5	5.06925	0.037735
235	Q5SW83	ARP2 actin-related protein 2 homolog (Yeast)	Actr2	394	25145.8	35527.6	41302.9	5296.36	10215	4676.57	33992.1	6729.32	5.05134	0.0188064
236	Q9MD68	Cytochrome c oxidase subunit 1	mt-Co1	514	1.07668e+06	754924	566819	188894	127346	160725	799474	158988	5.02851	0.0481961
237	Q9QYZ9	Serine protease 30	Prss30	310	102772	81416.1	99617.3	20225.8	18308.8	18235.1	94601.8	18923.2	4.99924	0.00720906
238	P23953	Carboxylesterase 1C	Ces1c	554	33242.8	41406.6	41608.3	3239.68	17236.3	3028.19	38752.6	7834.72	4.94627	0.00886148
239	Q3UW56	Carboxylic ester hydrolase	Ces1g	565	74901.1	136001	128847	12151.2	9091.06	47927.4	113250	23056.6	4.91182	0.0230278
240	O08749	Dihydrolipoyl dehydrogenase, mitochondrial	Dld	509	178451	241757	235448	50379.1	38112.2	45075.4	218552	44522.3	4.90882	0.0112319
241	Q7JCZ1	Cytochrome c oxidase subunit 2	mt-Co2	227	1.6732e+06	1.89234e+06	2.34782e+06	391474	384731	432246	1.97112e+06	402817	4.89334	0.0152639
242	P17892	Pancreatic lipase-related protein 2	Pnliprp2	482	1.45552e+06	1.09836e+06	1.25138e+06	236074	265421	280317	1.26842e+06	260604	4.86721	0.0095098
243	D9J349	Intelectin 1	Itln1	313	221675	196024	239379	35491.9	70746.9	30973.9	219026	45737.6	4.78875	0.000622019
244	P09411	Phosphoglycerate kinase 1	Pgk1	417	332467	383576	396471	67196.9	125707	39532	370838	77478.7	4.78632	0.00106044
245	Q61425	Hydroxyacyl-coenzyme A dehydrogenase, mitochondrial	Hadh	314	119500	216059	225065	31784.7	41699.5	44614.2	186874	39366.1	4.74708	0.0470086
246	Q3U7Z6	MCG113582	Pgam1	254	23341.9	45012.4	40397.4	8551.19	13928.5	564.774	36250.5	7681.47	4.71921	0.029322
247	Q9WVA4	Transgelin-2	Tagln2	199	67206.3	132688	97151.2	28526.4	27403.4	7278.78	99015.1	21069.5	4.69945	0.0413624
248	P63017	Heat shock cognate 71 kDa protein	Hspa8	646	388557	660162	646687	102665	164997	93448.4	565135	120370	4.69498	0.0308866
249	Q53YP5	Fatty acid binding protein 2, intestinal	Fabp2	132	434577	430688	386706	93085	94678.5	81567.5	417323	89777	4.64844	0.00119863
250	P11679	Keratin, type II cytoskeletal 8	Krt8	490	1.12819e+06	1.58051e+06	2.11631e+06	302407	480466	264879	1.60834e+06	349251	4.60511	0.0416974
251	Q61838	Pregnancy zone protein	Pzp	1495	286574	311540	266116	72581.1	50209.4	67750.7	288077	63513.7	4.53566	0.000620753
252	Q3U6L3	Glutaredoxin, isoform CRA_a	Glrx	107	104396	142708	169639	26231.6	38754	28953.6	138914	31313.1	4.43631	0.0257646
253	A2BHR0	Protein Obp2b	Obp2b	176	15417.5	9499	10325.7	3137.62	2573.4	2288.25	11747.4	2666.42	4.40567	0.0370307
254	Q542H2	Proteasome subunit alpha type	Psma7	248	179532	223257	222758	39869.8	52626.6	49492.4	208516	47329.6	4.40561	0.00532257
255	A0A0R4J0B6	ATP-binding cassette sub-family G member 2	Abcg2	657	194719	213616	317967	52985.6	65715	48355.5	242101	55685.4	4.34766	0.0376542
256	Q3UER1	Fructose-bisphosphate aldolase	Aldob	364	104342	129580	133232	29168.6	24069.1	32164.8	122385	28467.5	4.2991	0.00634779
257	Q9D2Z1	Protein Ceacam20	Ceacam20	577	41127.3	38855.6	46704.3	8717.74	8096.64	12743.9	42229.1	9852.75	4.28602	0.000761803
258	Q9D871	Carcinoembryonic antigen-related cell adhesion molecule 18	Ceacam18	376	14959.3	20125.6	14501.4	3753.79	4084.81	3946.37	16528.8	3928.32	4.20759	0.0196305
259	Q8CHP8	Glycerol-3-phosphate phosphatase	Pgp	321	32457.4	47412.7	57011.8	15033.1	6599.18	12006.2	45627.3	11212.8	4.0692	0.0298169
260	Q3UPA1	Guanine nucleotide binding protein, alpha 11	Gna11	359	343002	393973	592628	79465.7	145928	111999	443201	112464	3.94082	0.0420981
261	Q9WVC8	Chloride anion exchanger	Slc26a3	757	740877	798139	1.01787e+06	178980	243931	229748	852294	217553	3.91764	0.0135733
262	B1AQ78	Keratin 19	Krt19	403	447881	512318	769546	122451	218194	121835	576582	154160	3.74015	0.0394171
263	Q8BMD8	Calcium-binding mitochondrial carrier protein SCaMC-1	Slc25a24	475	95680.4	76398.3	106822	2415.36	30484	42169.8	92966.8	25023.1	3.71525	0.0119097
264	Q4KML7	Ezrin	Ezr	586	422257	353136	432437	92038	129313	105433	402610	108928	3.69611	0.00252423
265	A0A075B5R7	Protein Ighv14-2 (Fragment)	Ighv14-2	117	20314.5	34210.3	39918.7	1192.34	16194.5	8186.06	31481.2	8524.3	3.69311	0.0380396
266	Q8BWT1	3-ketoacyl-CoA thiolase, mitochondrial	Acaa2	397	60916.8	87133.7	87420.3	30290.8	16010.6	17592.9	78490.3	21298.1	3.68532	0.0103635
267	P19157	Glutathione S-transferase P 1	Gstp1	210	317590	454402	521277	112017	170604	70445	431090	117689	3.66296	0.0197381
268	Q9R1Z7	6-pyruvoyl tetrahydrobiopterin synthase	Pts	144	93790	139357	96668.1	23929.9	32448	34028.6	109938	30135.5	3.64814	0.02801
269	Q63886	UDP-glucuronosyltransferase 1-1	Ugt1a1	535	24080.4	27351.5	39412.3	8932.2	7260.28	8762.32	30281.4	8318.26	3.64035	0.0406755
270	B2MWM9	Calreticulin	Calr	416	41945.2	70492.5	71140.7	19150.2	16466.9	15123.8	61192.8	16913.6	3.61796	0.0423256
271	Q9Z0L8	Gamma-glutamyl hydrolase	Ggh	317	694141	672652	710479	270598	145021	158698	692424	191439	3.61695	0.00389038
272	P05784	Keratin, type I cytoskeletal 18	Krt18	423	51207.9	61154.2	80909.4	14221.4	30685.2	8712.67	64423.9	17873.1	3.60452	0.0152717
273	E9Q0N2	Protein Ptprh	Ptprh	971	10383.8	7466.36	10640.3	3620.63	327.471	4275.23	9496.82	2741.11	3.46459	0.0141005
274	Q9JKA5	Cell surface A33 antigen	Gpa33	319	1.42916e+06	1.63871e+06	1.96015e+06	505992	404821	552960	1.67601e+06	487925	3.43497	0.0116226
275	G3X9Y6	Aldo-keto reductase family 1, member C19	Akr1c19	323	220683	331667	394971	166004	35899.8	75255.7	315774	92386.4	3.41797	0.0280082
276	Q6NSR8	Probable aminopeptidase NPEPL1	Npepl1	524	222052	215378	304326	60784	69507.9	86881.5	247252	72391.1	3.4155	0.0199202
277	B2RXY7	Carbonyl reductase 1	Cbr1	277	188617	273981	236764	54011.4	91972.2	59439.7	233121	68474.4	3.40449	0.0104296
278	E9Q7P9	Cadherin-related family member 2	Cdhr2	1308	7.32965e+06	7.5835e+06	9.81268e+06	2.19648e+06	2.60943e+06	2.47932e+06	8.24194e+06	2.42841e+06	3.39397	0.0161186
279	Q62470	Integrin alpha-3	Itga3	1053	46069	37447	51083.6	21401.3	1168.07	18072.5	44866.6	13547.3	3.31184	0.0190284
280	P09055	Integrin beta-1	Itgb1	798	298846	345748	462247	128451	144939	64501	368947	112630	3.27574	0.018697
281	Q4FJQ0	MCG130610	Rab7	207	56111.3	61866.3	70176	18156.3	19011.2	20565.8	62717.8	19244.4	3.25901	0.00732085
282	Q4VAE6	Ras family member A	Rhoa	193	180405	172247	188127	55397.8	67497.2	43044.3	180260	55313.1	3.2589	0.000310071
283	P97449	Aminopeptidase N	Anpep	966	2.01447e+07	1.64532e+07	2.21163e+07	4.86178e+06	7.05641e+06	6.11418e+06	1.95714e+07	6.01079e+06	3.25604	0.00781818
284	Q8BT60	Copine-3	Cpne3	533	134226	111212	136968	55212.9	25515.5	37692.1	127469	39473.5	3.22922	0.00178903
285	Q60604	Adseverin	Scin	715	86380.2	111511	144247	43770.5	39616.3	24255	114046	35880.6	3.17849	0.0316406
286	Q3TJY2	WD repeat domain 1	Wdr1	606	82547	127124	94148.1	27144.2	46432.5	23794.1	101273	32456.9	3.12023	0.0193054
287	A0A0R4J1V0	Na(+)/H(+) exchange regulatory cofactor NHE-RF3	Pdzk1	519	83771	79725.4	124479	30672.3	35243.7	27413.9	95991.9	31110	3.08557	0.0422556
288	Q5SVY2	Peptidyl-prolyl cis-trans isomerase	Ppia	164	665228	1.18308e+06	1.19379e+06	284208	529700	190845	1.01403e+06	334918	3.02771	0.0393147
289	K7Q7T7	RAS-related C3 botulinum substrate 1	Rac1	192	61609.7	73432.4	103774	17626.5	32525	28820.5	79605.5	26324	3.02407	0.0390697
290	P28665	Murinoglobulin-1	Mug1	1476	816898	761454	797999	220707	278266	298912	792117	265962	2.97831	0.000113934
291	E9Q616	Protein Ahnak	Ahnak	5656	187299	184418	188328	56628.7	77235.9	59034.2	186682	64299.6	2.90331	0.00217112
292	E9QKR0	Guanine nucleotide-binding protein G(I)/G(S)/G(T) subunit beta-2	Gnb2	382	52041.2	57225.1	36750.8	11602	22941.3	15854.9	48672.4	16799.4	2.89726	0.0187462
293	Q542G9	Annexin	Anxa2	339	494475	463300	644753	221364	154677	180148	534176	185396	2.88127	0.0164465
294	Q6P069	Sorcin	Sri	198	163617	177122	196330	62895.3	58949	65030.3	179023	62291.5	2.87396	0.00523763
295	Q06138	Calcium-binding protein 39	Cab39	341	55073.8	61939.8	85281.1	21646.5	28443.8	23062.1	67431.6	24384.1	2.76539	0.0367229
296	P08730	Keratin, type I cytoskeletal 13	Krt13	437	8279.17	6043.53	6057.4	2250.45	1992.19	3142.49	6793.36	2461.71	2.75961	0.015208
297	Q8R0F8	Acylpyruvase FAHD1, mitochondrial	Fahd1	227	629203	590908	731829	172985	252101	284519	650646	236535	2.75074	0.00186761
298	Q9QXX3	Group 10 secretory phospholipase A2	Pla2g10	151	36325.7	30024.4	29041.6	4965.83	16035.3	13921.5	31797.2	11640.9	2.73151	0.0110148
299	B2RTM0	Histone H4	Hist2h4	103	1.90333e+06	1.90066e+06	2.49528e+06	598809	865218	855277	2.09975e+06	773101	2.71602	0.0111578
300	Q8K1H9	Odorant-binding protein 2a	Obp2a	176	1.26288e+06	985180	1.15435e+06	456844	389075	436068	1.13414e+06	427329	2.65402	0.00947394
301	Q9WVJ3	Carboxypeptidase Q	Cpq	470	136898	157835	209300	59129.1	67796.2	64431.4	168011	63785.6	2.63399	0.0384519
302	A0A0A0MQF6	Glyceraldehyde-3-phosphate dehydrogenase	Gapdh	359	606788	846709	655044	398514	271428	135013	702847	268318	2.61945	0.0147282
303	A0A075B5R2	Protein Ighv7-3 (Fragment)	Ighv7-3	120	27287.2	26690.3	36942.9	12487.6	7483.87	15201.4	30306.8	11724.3	2.58496	0.0132467
304	A0A075B5Q0	Protein Ighv5-6 (Fragment)	Ighv5-6	117	30787.3	40087.2	40671.7	18288.1	4652.59	20553.7	37182.1	14498.1	2.56461	0.024672
305	Q9DBP0	Sodium-dependent phosphate transport protein 2B	Slc34a2	697	174965	169688	248872	38699.7	95150.5	97896.9	197842	77249	2.56109	0.0224216
306	A0A0G2JE99	Protein Iglc1 (Fragment)	Iglc1	106	51058.6	32206.5	43555.5	17423.5	11929.8	20527.2	42273.5	16626.8	2.54249	0.0271843
307	Q3TA96	Lysosomal membrane glycoprotein 1, isoform CRA_c	Lamp1	406	524043	569651	724963	258594	202961	256546	606219	239367	2.53259	0.0193909
308	Q07797	Galectin-3-binding protein	Lgals3bp	577	1.27694e+06	1.02638e+06	1.20827e+06	481572	439081	483387	1.17053e+06	468013	2.50106	0.00913143
309	Q00897	Alpha-1-antitrypsin 1-4	Serpina1d	413	1.18506e+06	1.28709e+06	1.68293e+06	452779	580168	632280	1.38502e+06	555076	2.4952	0.0221064
310	P57716	Nicastrin	Ncstn	708	171280	165366	194344	67461.2	64592.3	82358.3	176997	71470.6	2.4765	0.00125712
311	Q9D7U0	Prostate stem cell antigen	Psca	123	1.48279e+06	1.13714e+06	1.23161e+06	465916	451711	637775	1.28385e+06	518467	2.47624	0.00623311
312	Q78IQ7	Zinc transporter ZIP4	Slc39a4	660	33939.2	33673.4	46121.5	14029.6	16854.4	15172.8	37911.4	15352.3	2.46943	0.0276617
313	Q5NC41	Protein 1810065E05Rik	1810065E05Rik	235	1.17267e+06	1.19191e+06	1.31707e+06	458027	523866	524420	1.22721e+06	502105	2.44414	0.000870669
314	Q3UWA6	Heat-stable enterotoxin receptor	Gucy2c	1072	163290	193413	214137	66162	92718.6	74912.8	190280	77931.1	2.44164	0.00643789
315	Q9Z0G9	Claudin-3	Cldn3	219	97707.7	108017	91205.1	42237.9	35032.9	44991.4	98976.5	40754.1	2.42863	0.00133485
316	A0A0R4IZW5	Cadherin 1, isoform CRA_b	Cdh1	884	2.25935e+06	2.18355e+06	2.36631e+06	997965	845269	965901	2.26974e+06	936378	2.42395	5.22068e-05
317	A0A0R4J0B2	Phospholipase B-like 1	Plbd1	550	260397	283303	370261	118833	122955	142079	304654	127956	2.38094	0.0294759
318	Q91WR8	Glutathione peroxidase 6	Gpx6	221	66421.2	65114.1	96683.6	37769.3	21991.1	37033.2	76073	32264.6	2.35779	0.0331811
319	Q9EQ08	Heparan N-sulfatase	Sgsh	502	6997.38	5955.56	4661.27	1870.06	2635.92	3001.04	5871.4	2502.34	2.34637	0.0220827
320	Q3UL35	Galectin	Lgals4	326	1.42967e+06	1.70346e+06	2.23992e+06	769789	950119	613677	1.79101e+06	777862	2.30249	0.0364053
321	A0A075B5R9	Protein Ighv14-3 (Fragment)	Ighv14-3	117	128166	164229	144158	72106.9	51218	68666.9	145518	63997.3	2.27381	0.00493815
322	O09159	Lysosomal alpha-mannosidase	Man2b1	1013	204533	311222	251306	125652	93540.3	127272	255687	115488	2.21396	0.0335848
323	P22599	Alpha-1-antitrypsin 1-2	Serpina1b	413	847661	624693	760855	345938	328427	383785	744403	352717	2.11048	0.0210583
324	Q4FJX9	Superoxide dismutase	Sod2	222	208982	260289	302461	103645	134376	135007	257244	124343	2.06883	0.0268689

## Sheet: GF>SPF
Supplementary Table 1 - Host-derived proteins with higher abundance in GF mice (GF/SPF > 2-fold, p < 0.05, 45 proteins)
No	Uniprot ID	Protein name	Gene name	No. of amino acids	SPF1 area	SPF2 area	SPF3 area	GF1 area	GF2 area	GF3 area	SPF_Average	GF_Average	GF/SPF	P-value SPFvsGF
1	P09470	Angiotensin-converting enzyme	Ace	1312	480878	684414	797947	6.86604e+06	6.71404e+06	7.01625e+06	654413	6.86544e+06	10.491	1.10211e-06
2	A0A0J9YVE6	Protein Mgam	Mgam	1200	1.00639e+06	1.71047e+06	2.72302e+06	1.67293e+07	1.55202e+07	1.60791e+07	1.81329e+06	1.61095e+07	8.88412	4.68302e-05
3	Q9D3Q9	Protein 2010106E10Rik	2010106E10Rik	269	109177	115349	146414	454335	432063	428728	123647	438375	3.54538	5.66933e-05
4	Q8QZW3	Protein FAM151A	Fam151a	608	82312.2	99713.5	120028	358023	388957	359785	100685	368922	3.66413	5.7453e-05
5	E9PWP7	Protein Muc3	Muc3	378	218895	150233	141799	1.07164e+06	1.08783e+06	1.10955e+06	170309	1.08967e+06	6.39821	9.79072e-05
6	Q5M9K1	Transthyretin	Ttr	147	439151	623322	753202	8.93067e+06	8.50921e+06	9.28714e+06	605225	8.909e+06	14.7202	0.000143216
7	Q7M758	N-acetylated-alpha-linked acidic dipeptidase-like protein	Naaladl1	745	3.77009e+06	3.60393e+06	5.63791e+06	1.64846e+07	1.67044e+07	1.80207e+07	4.33731e+06	1.70699e+07	3.93559	0.000166661
8	Q07456	Protein AMBP	Ambp	349	26740.5	29171.7	31296.9	77989	71524.8	77892	29069.7	75801.9	2.60759	0.000177387
9	Q9JJ00	Phospholipid scramblase 1	Plscr1	328	103065	58246.5	108449	591004	577104	567777	89920	578628	6.43492	0.000205277
10	B5THE2	Maltase-glucoamylase	Mgam	1827	2.34991e+06	3.20824e+06	4.22273e+06	1.39659e+07	1.28592e+07	1.3543e+07	3.26029e+06	1.3456e+07	4.12724	0.00031611
11	F8VPQ6	Alkaline phosphatase	Alpi	554	672888	1.04759e+06	1.28714e+06	6.47954e+06	5.95464e+06	6.98968e+06	1.00254e+06	6.47462e+06	6.45821	0.000342321
12	F8VQM0	Alkaline phosphatase	Akp3	559	882510	1.00967e+06	918143	6.92535e+06	6.7995e+06	7.38098e+06	936774	7.03528e+06	7.51011	0.000520457
13	Q9CQ52	Chymotrypsin-like elastase family member 3B	Cela3b	269	2.0028e+07	1.31409e+07	1.39288e+07	1.15652e+08	1.29021e+08	1.12997e+08	1.56992e+07	1.19223e+08	7.59422	0.000532869
14	Q9QX97	Trefoil Factor 2/Spasmolytic polypeptide protein	Tff2	129	73124.6	83601.5	51687.7	2.45405e+06	2.22467e+06	2.4537e+06	69471.3	2.37747e+06	34.2224	0.000941059
15	E9QPG8	Deleted in malignant brain tumors 1 protein	Dmbt1	1946	3.03682e+06	2.028e+06	2.50268e+06	6.48811e+07	5.90645e+07	6.61059e+07	2.5225e+06	6.33505e+07	25.1142	0.00106964
16	Q8R0I0	Angiotensin-converting enzyme 2	Ace2	805	444975	538204	584179	2.82289e+06	2.58386e+06	2.99245e+06	522453	2.79973e+06	5.35883	0.00108067
17	Q9D7S0	Ly6/PLAUR domain-containing protein 8	Lypd8	255	42130.6	38678.5	48273.4	122768	105111	111790	43027.5	113223	2.63141	0.00108311
18	E9Q9C6	Protein Fcgbp	Fcgbp	2583	1.9734e+07	1.83067e+07	2.25717e+07	6.44547e+07	5.60312e+07	5.67225e+07	2.02041e+07	5.90695e+07	2.92363	0.00130761
19	Q6PZE0	Mucin-19	Muc19	7524	13738.8	19453.7	8799.19	53326	58322.3	54615.9	13997.2	55421.4	3.95945	0.00143566
20	D3YX03	Protein Gm7849	Gm7849	116	36754.2	41050.9	36149.2	1.02249e+06	1.06722e+06	935114	37984.8	1.00828e+06	26.5442	0.00157145
21	Q3TMT3	Transmembrane 4 L6 family member 4	Tm4sf4	202	46043.3	46724	51162.8	837499	757769	873611	47976.7	822960	17.1533	0.00190667
22	A0A140T8M6	Protein Igkv3-5 (Fragment)	Igkv3-5	120	10833.5	3920.24	8341.67	29910.4	38799.9	31112.8	7698.47	33274.3	4.3222	0.00248952
23	Q6YI28	EP1	2210407C18Rik	220	863828	738383	746907	1.73746e+06	1.72856e+06	2.00705e+06	783039	1.82436e+06	2.32984	0.00271147
24	Q9D7P9	Serpin B12	Serpinb12	423	219207	175261	243346	643028	566801	710673	212605	640167	3.01107	0.00314747
25	Q91XF2	Protein Tm4sf5	Tm4sf5	196	45760.3	86781.8	43024.4	505893	380759	442283	58522.1	442979	7.56942	0.00390806
26	Q9CQY8	Transmembrane 4 L6 family member 20	Tm4sf20	226	16570.2	7781.13	20922.2	50178.5	64052.4	48058.9	15091.2	54096.6	3.58465	0.0043233
27	Q62395	Trefoil factor 3	Tff3	81	4.66686e+06	4.58482e+06	4.58251e+06	1.42828e+07	1.22794e+07	1.30368e+07	4.6114e+06	1.31997e+07	2.8624	0.00451929
28	Q3UAI3	CD36 antigen, isoform CRA_a	Cd36	472	89720.1	156894	230250	459356	433794	527936	158955	473695	2.98007	0.00457307
29	Q9CQM2	ER lumen protein-retaining receptor 2	Kdelr2	212	4846.26	5717.83	5965.78	17179.3	18571.4	21333.6	5509.96	19028.1	3.4534	0.00516975
30	A0A075B5T2	Protein Ighv6-3 (Fragment)	Ighv6-3	119	38772.2	24734.6	53203.2	93050.9	124515	125172	38903.3	114246	2.93666	0.005896
31	G3X9V8	MCG129038	Serpinb3a	387	635048	470054	605611	1.79293e+06	1.92478e+06	2.29669e+06	570237	2.0048e+06	3.51573	0.00616928
32	Q792Y6	Anionic trypsin-2	Prss2	246	3.30516e+06	2.87752e+06	3.1499e+06	4.0869e+07	3.19578e+07	3.48337e+07	3.11086e+06	3.58868e+07	11.536	0.00626369
33	A0A140T8P9	Protein Igkv14-111 (Fragment)	Igkv14-111	118	12362.3	29457.5	42123.8	138791	188077	138456	27981.2	155108	5.54329	0.00628996
34	F6WR04	Cathepsin S	Ctss	341	199587	252484	282282	590360	469085	477205	244784	512217	2.09252	0.00752972
35	Q9ES97	Reticulon-3	Rtn3	964	16302.3	4693.99	30569.7	53098.8	76364.9	77566.9	17188.7	69010.2	4.01487	0.00910704
36	Q9Z0J0	Epididymal secretory protein E1	Npc2	149	130620	88057.4	113794	628586	813825	868938	110824	770450	6.95204	0.0102633
37	Q549D0	Tetraspanin	Cd63	238	17513.8	21824.1	6387.27	54997.5	53891.1	56022.5	15241.7	54970.4	3.60658	0.0120007
38	Q9ES88	Solute carrier family 13 member 2	Slc13a2	586	20468.8	30898.3	61410.9	146690	144346	147908	37592.7	146315	3.89211	0.0120647
39	Q91XA9	Acidic mammalian chitinase	Chia	473	3.07306e+06	2.49062e+06	3.68528e+06	3.20249e+07	2.11568e+07	2.28983e+07	3.08298e+06	2.536e+07	8.22579	0.0212046
40	G3X8T9	Serine (Or cysteine) peptidase inhibitor, clade A, member 3N, isoform CRA_a	Serpina3n	418	57273.1	35312.3	78102.2	139103	139085	139677	56895.9	139288	2.44813	0.0217284
41	Q3UV17	Keratin, type II cytoskeletal 2 oral	Krt76	594	7201.82	20587.2	15079.2	72302.6	77463.7	113135	14289.4	87633.6	6.13276	0.02177
42	A0A0A6YXC3	Protein Ighv1-52 (Fragment)	Ighv1-52	117	2416.87	1348.25	367.937	5075.57	3828.26	3470.79	1377.69	4124.87	2.99406	0.0244988
43	Q3V2F7	Fatty acid binding protein 1, liver	Fabp1	127	41298.3	162917	246498	480378	911947	886675	150238	759667	5.05643	0.0337291
44	A0A075B5X3	Protein Ighv1-64 (Fragment)	Ighv1-64	117	4254.68	3063.8	1311.16	14073.7	9219.62	18618.1	2876.55	13970.5	4.85667	0.0445024
45	A0A140T8M0	Protein Igkv1-117 (Fragment)	Igkv1-117	120	1399.59	9006.9	9980.27	16626.8	19980.7	13272.4	6795.59	16626.6	2.44668	0.0475587
